# Supplementary material for: DEPDC1 Promotes Thyroid Cancer Migration, Invasion, and Proliferation, and Correlates with Poor Prognosis
Source: Preprints.org preprint supplement (doi:10.20944/preprints202311.1621.v1), 2023-11-28
Supplement: Supplementary file 1 [file Supplementary Material 1.xlsx]

## Sheet: Sheet1
Gene	logFC	AveExpr	t	P.Value	adj.P.Val	B
2023-03-01	1.30213	4.79627	6.02525	5.65488e-08	2.62282e-07	7.6401
AADACP1	-2.02432	5.39195	-7.4241	1.39519e-10	9.71749e-10	13.5575
ABAT	-2.52675	8.45604	-13.1176	3.37946e-21	2.26751e-19	37.8224
ABCA8	-1.26605	5.05148	-14.7308	5.91379e-24	1.00976e-21	44.1232
ABCC5	1.06547	5.88901	16.6093	5.52496e-27	2.34095e-24	51.0336
ABCC6	-1.01486	5.95786	-8.81004	3.12886e-13	3.43843e-12	19.5998
ABHD10	-1.05527	8.89828	-11.0885	1.54844e-17	4.03054e-16	29.4462
ABHD12	-1.28814	8.71182	-10.1846	7.58281e-16	1.38574e-14	25.5795
ABHD14A	-1.49799	8.67548	-11.0863	1.56299e-17	4.05916e-16	29.4369
ABLIM1	-2.15754	8.54503	-12.5192	3.8663e-20	1.93895e-18	35.4014
ABR	1.03872	6.90302	10.0239	1.5249e-15	2.62329e-14	24.8854
ACAD8	-1.38161	7.76354	-8.99187	1.40421e-13	1.65015e-12	20.3947
ACADL	-3.11404	7.09507	-15.117	1.35875e-24	2.77573e-22	45.5815
ACADSB	-1.22068	6.90305	-11.7848	8.15127e-19	2.86044e-17	32.3723
ACOT7	1.82549	6.16018	11.3632	4.81727e-18	1.39872e-16	30.6066
ACOX2	-1.82497	7.76785	-10.2298	6.2329e-16	1.16036e-14	25.7743
ACP5	2.29823	6.65928	6.39372	1.19613e-08	6.14447e-08	9.16667
ACSF2	-1.58954	8.61604	-12.3061	9.30532e-20	4.26665e-18	34.5288
ACSS3	-1.10239	7.14123	-6.99043	9.22237e-10	5.6616e-09	11.692
ACTN1	1.73401	7.91874	15.5596	2.57825e-25	6.62812e-23	47.2287
ACTR3C	-1.00862	5.80519	-8.16109	5.47336e-12	4.87278e-11	16.7625
ADA	1.71526	6.07696	7.75754	3.2337e-11	2.52257e-10	15.0036
ADAM12	2.22272	4.54656	17.3387	4.14836e-28	2.56525e-25	53.5938
ADAM19	1.0208	5.31648	10.4601	2.29932e-16	4.71403e-15	26.7651
ADAMTS12	1.30624	5.57608	17.8547	6.90872e-29	6.87268e-26	55.3645
ADAMTS2	1.62751	5.49133	14.7337	5.84938e-24	1.00627e-21	44.1341
ADAMTS6	1.27913	3.7976	9.79116	4.2079e-15	6.64436e-14	23.8772
ADAP2	1.61201	6.81635	11.2506	7.76886e-18	2.14676e-16	30.1317
ADD3	-1.68167	10.973	-14.7154	6.27421e-24	1.04784e-21	44.0645
ADH1B	-2.15509	5.61551	-12.6937	1.89129e-20	1.02299e-18	36.1118
ADHFE1	-1.08794	7.05905	-12.0092	3.18961e-19	1.25608e-17	33.3047
ADIRF	-3.27362	9.7602	-15.5893	2.3081e-25	6.00106e-23	47.3383
ADM	2.90425	8.95134	15.4083	4.53734e-25	1.05933e-22	46.6686
ADORA2B	2.4348	4.83557	14.9043	3.04738e-24	5.76233e-22	44.7807
ADORA3	1.80795	5.04775	12.4572	4.98796e-20	2.40769e-18	35.1483
AF070581	-1.05523	6.73037	-4.13367	9.1188e-05	0.000255998	0.460785
AF131215.8	-1.41433	5.56129	-8.94217	1.74782e-13	2.00956e-12	20.1775
AFAP1L2	-3.24543	8.2522	-17.9224	5.47531e-29	5.69433e-26	55.5941
AGPAT9	-2.08674	7.96331	-9.44327	1.92997e-14	2.66815e-13	22.3646
AGR3	-2.31852	5.23993	-7.18682	3.9296e-10	2.56884e-09	12.5343
AHCYL2	-1.39232	7.35583	-12.0234	3.0068e-19	1.19645e-17	33.3633
AHNAK2	1.5502	5.29389	11.8778	5.52048e-19	2.04868e-17	32.7595
AIF1	1.364	7.20707	8.1622	5.44663e-12	4.85383e-11	16.7674
AIF1L	-2.91622	8.19936	-19.4263	3.5705e-31	7.42663e-28	60.5562
AIM1	1.31254	7.70445	8.12491	6.41974e-12	5.6342e-11	16.6045
AIM2	2.31494	6.04183	6.25074	2.19219e-08	1.08074e-07	8.5709
AJ011981	1.09443	4.47191	11.5653	2.05093e-18	6.53554e-17	31.4553
AK021804	1.03268	7.85041	3.9097	0.000199518	0.000525858	-0.287356
AK021977	1.11712	5.43829	5.80655	1.40313e-07	6.13134e-07	6.7489
AK026714	1.87993	5.10972	6.8783	1.49817e-09	8.88728e-09	11.2133
AK026905	1.04982	5.0071	9.90101	2.60497e-15	4.27252e-14	24.3535
AK4	1.10303	6.58982	8.0693	8.20211e-12	7.08702e-11	16.3618
AK5	1.22939	4.66543	6.364	1.35708e-08	6.91226e-08	9.04248
AL132709.8	1.55209	3.71013	6.88017	1.48608e-09	8.82242e-09	11.2213
AL832909	-1.35832	8.67094	-9.32906	3.18637e-14	4.2398e-13	21.8668
ALDH1A1	-3.71046	10.3109	-16.846	2.36748e-27	1.10547e-24	51.8719
ALDH1A3	1.53091	5.04104	11.6702	1.3187e-18	4.38544e-17	31.8942
ALDH2	-1.52516	10.2412	-11.0763	1.63162e-17	4.21557e-16	29.3942
ALDH3A2	-1.55054	9.23006	-11.3862	4.37033e-18	1.29023e-16	30.7034
ALDH5A1	-1.59481	6.7673	-11.7327	1.01396e-18	3.44717e-17	32.1553
ALDH6A1	-1.16161	7.28507	-8.8998	2.1066e-13	2.38609e-12	19.9922
ALDH9A1	-1.37504	11.7447	-14.04	8.60952e-23	9.48275e-21	41.4661
ALOX5	1.3646	5.37396	6.89449	1.39691e-09	8.32976e-09	11.2823
ALOX5AP	2.28969	7.65901	8.00337	1.09659e-11	9.24806e-11	16.0742
AMIGO1	-1.22955	6.6189	-10.3064	4.47087e-16	8.58166e-15	26.1044
AMOTL2	-1.12124	9.07031	-6.58248	5.3471e-09	2.89497e-08	9.95922
AMPH	1.1188	4.84524	6.38399	1.24662e-08	6.3795e-08	9.12599
ANGPT2	1.10441	5.85153	6.74113	2.7066e-09	1.53551e-08	10.6301
ANGPTL1	-3.50509	7.75566	-20.3444	1.87604e-32	7.15395e-29	63.4542
ANGPTL2	1.4695	6.43264	12.6596	2.17416e-20	1.16226e-18	35.9733
ANGPTL4	1.28631	6.42486	6.60152	4.92852e-09	2.68168e-08	10.0395
ANK3	-1.26281	7.04296	-9.78679	4.28894e-15	6.75368e-14	23.8582
ANKRD22	1.86233	6.01463	7.4319	1.3484e-10	9.42605e-10	13.5912
ANLN	4.2413	4.72389	16.2236	2.23145e-26	7.62025e-24	49.6521
ANO5	-2.15249	6.38439	-12.2117	1.37487e-19	6.01472e-18	34.1409
ANPEP	1.09198	4.35333	13.6601	3.85417e-22	3.40476e-20	39.9783
ANTXR2	1.37088	5.71716	10.3782	3.27567e-16	6.50949e-15	26.4135
ANXA3	-3.10233	9.46619	-10.2139	6.67605e-16	1.23283e-14	25.706
ANXA9	-2.26422	6.56701	-13.2191	2.24507e-21	1.62578e-19	38.2286
AOX1	-1.3006	7.2943	-5.47707	5.39781e-07	2.16404e-06	5.43065
AP000525.9	2.87603	5.94107	15.4489	3.89849e-25	9.29139e-23	46.819
AP1M2	-1.93442	7.95698	-10.8806	3.76617e-17	9.10613e-16	28.5629
AP1S2	1.07399	8.0132	7.74593	3.40302e-11	2.64744e-10	14.9531
AP1S3	-1.4953	5.54797	-10.3737	3.34019e-16	6.61675e-15	26.3941
AP2S1	1.21451	9.20211	12.2257	1.29757e-19	5.68742e-18	34.1984
APCDD1L	1.8553	5.0379	7.81303	2.53393e-11	2.00818e-10	15.245
APMAP	-1.02847	11.2304	-10.7443	6.75679e-17	1.53368e-15	27.9821
APOBEC3B	2.23143	6.23315	7.39531	1.58234e-10	1.09311e-09	13.4331
APOC1	1.30894	7.9769	4.67928	1.23197e-05	4.00846e-05	2.38847
APOD	-1.85143	7.84135	-5.99573	6.39672e-08	2.94185e-07	7.51914
APOE	1.16323	7.98723	4.26791	5.63932e-05	0.000163928	0.921784
APTR	-1.75868	6.96581	-12.9566	6.48449e-21	4.06041e-19	37.1751
AQP4	-1.87657	5.42555	-8.26107	3.52234e-12	3.25753e-11	17.1993
AQP9	1.69659	5.94072	9.20487	5.49971e-14	6.98298e-13	21.325
AR	-1.05257	6.49386	-8.33417	2.55176e-12	2.4076e-11	17.5187
ARG2	-1.28723	8.27144	-7.79723	2.71614e-11	2.14294e-10	15.1762
ARHGAP11B	1.03601	3.64478	7.1652	4.31727e-10	2.80065e-09	12.4413
ARHGAP20	-1.20463	6.40631	-11.7857	8.11798e-19	2.85753e-17	32.3763
ARHGAP24	-1.16076	7.13645	-9.16662	6.50723e-14	8.13582e-13	21.158
ARHGAP44	-1.10363	6.32555	-10.5889	1.31881e-16	2.85471e-15	27.3175
ARHGAP6	-1.50533	6.75321	-13.2007	2.41823e-21	1.69202e-19	38.1548
ARHGAP8	-1.18341	5.83455	-8.67955	5.56223e-13	5.84583e-12	19.0291
ARHGAP9	1.08699	5.93148	3.76849	0.000322742	0.00081939	-0.744841
ARHGEF5	-1.25446	7.67474	-7.7265	3.70627e-11	2.87067e-10	14.8686
ARHGEF6	1.02404	7.3587	4.68165	1.22096e-05	3.97715e-05	2.39715
ARL4C	2.04636	6.41705	9.72023	5.73701e-15	8.80368e-14	23.5693
ARL4D	-1.06729	6.1241	-11.495	2.75896e-18	8.49596e-17	31.1605
ARMCX2	-1.23668	10.4248	-10.5176	1.79352e-16	3.78908e-15	27.012
ARMCX5-GPRASP2	-1.87954	9.60505	-12.6782	2.01461e-20	1.08203e-18	36.049
ARNTL2	2.32962	5.01131	12.3466	7.87073e-20	3.67515e-18	34.6951
ARPC1B	1.06182	9.79192	6.79364	2.15882e-09	1.24449e-08	10.853
ARRB2	1.06309	6.06431	8.53188	1.06685e-12	1.06872e-11	18.3832
ARRDC3	-1.06051	10.2883	-7.31386	2.25852e-10	1.52614e-09	13.0814
ARRDC4	-1.4392	9.53044	-7.66288	4.90058e-11	3.71153e-10	14.5922
ARSJ	2.18749	4.52501	10.5152	1.81207e-16	3.82122e-15	27.0018
ART4	-1.45357	4.93442	-8.61577	7.36918e-13	7.60175e-12	18.7501
AS3MT	-1.29127	6.20167	-7.67645	4.61718e-11	3.51434e-10	14.6512
ASAH1	-1.06786	9.75936	-12.754	1.47857e-20	8.25115e-19	36.3563
ASAP1	1.15978	7.42738	10.3068	4.4634e-16	8.57452e-15	26.1061
ASAP1-IT1	1.09761	4.97506	9.77988	4.42038e-15	6.95586e-14	23.8283
ASAP3	-1.00205	7.37016	-10.0399	1.42229e-15	2.45229e-14	24.9547
ASF1A	-1.06795	8.56742	-8.68836	5.35035e-13	5.64649e-12	19.0676
ASF1B	1.35584	5.91802	9.18395	6.02966e-14	7.59684e-13	21.2337
ASMTL	-1.05117	8.77163	-9.89367	2.68978e-15	4.40216e-14	24.3217
ASPHD2	1.1441	5.74536	7.02044	8.0975e-10	5.01817e-09	11.8204
ASPM	2.35988	4.19925	12.3651	7.29233e-20	3.4331e-18	34.771
ASS1	-2.71066	9.73422	-12.9344	7.09375e-21	4.3748e-19	37.0859
ATAD2	1.53693	5.88969	10.2524	5.64958e-16	1.06652e-14	25.8719
ATF3	-1.39105	6.99861	-5.98916	6.57466e-08	3.01944e-07	7.49221
ATF7IP2	-1.18956	7.13637	-11.0306	1.98253e-17	5.05126e-16	29.2006
ATOH8	-1.42923	6.52107	-9.86497	3.04859e-15	4.93992e-14	24.1973
ATP13A4	-1.67306	5.92277	-12.1719	1.62154e-19	6.97385e-18	33.9769
ATP1A1	-1.55415	11.5741	-11.7368	9.96725e-19	3.40374e-17	32.1724
ATP1B1	-2.14736	11.6807	-10.8478	4.33335e-17	1.02442e-15	28.4235
ATP2C2	-1.27045	5.70105	-13.9653	1.15433e-22	1.19507e-20	41.1751
ATP6V0E2	-2.12753	9.21005	-9.59041	1.01259e-14	1.47029e-13	23.0051
ATP6V0E2-AS1	-1.68379	6.58723	-7.99104	1.15776e-11	9.71739e-11	16.0205
ATP8A1	-1.87979	6.48218	-16.287	1.7719e-26	6.28545e-24	49.8804
ATXN7L3B	-1.05438	8.51795	-10.5411	1.62038e-16	3.45842e-15	27.1129
AUH	-1.44411	9.10992	-12.8021	1.2149e-20	7.01943e-19	36.5515
AUNIP	1.27484	4.63986	13.544	6.11389e-22	5.20022e-20	39.5202
AURKA	2.09653	5.45976	12.0549	2.63703e-19	1.06599e-17	33.4937
AURKB	1.20618	4.64919	7.6132	6.09412e-11	4.53442e-10	14.3766
AVEN	1.13317	7.25172	10.7531	6.50702e-17	1.48435e-15	28.0195
AVPR1A	-1.29188	5.70176	-12.0219	3.02611e-19	1.19996e-17	33.357
AX746755	-2.87603	7.83705	-14.3912	2.18985e-23	3.01829e-21	42.8246
AX746823	2.52041	4.27574	16.344	1.44057e-26	5.31617e-24	50.0853
B3GALNT1	-1.60376	7.49996	-8.46425	1.43766e-12	1.41906e-11	18.0875
B3GALT2	-1.09816	3.71582	-6.25716	2.13356e-08	1.05434e-07	8.59755
B4GALT5	1.10371	8.0135	11.1216	1.34472e-17	3.5569e-16	29.5864
BAG1	-1.04362	8.14064	-12.3311	8.39207e-20	3.90266e-18	34.6314
BAMBI	1.38939	5.36153	6.07771	4.54013e-08	2.13697e-07	7.85564
BANK1	-1.85731	7.36324	-10.6236	1.13546e-16	2.49802e-15	27.4663
BATF3	1.23193	5.89425	7.92295	1.5624e-11	1.28266e-10	15.7237
BBOX1	-2.97711	7.17274	-10.6161	1.17311e-16	2.5685e-15	27.4338
BBS12	-1.58621	7.95461	-10.2607	5.45055e-16	1.03236e-14	25.9075
BC017398	4.91094	4.66944	22.6659	1.62265e-35	1.85631e-31	70.3681
BC022047	-1.11494	7.78789	-10.0685	1.256e-15	2.19201e-14	25.0782
BC034319	1.91664	5.11218	10.9654	2.6192e-17	6.49971e-16	28.9239
BCAM	-1.03491	6.9795	-10.1967	7.19497e-16	1.31802e-14	25.6317
BCAT1	2.91847	6.22927	14.249	3.80504e-23	4.73148e-21	42.2764
BCL2	-1.35039	6.60015	-21.0819	1.87978e-33	1.07523e-29	65.7134
BCL2A1	2.46357	5.73087	5.51537	4.62213e-07	1.87375e-06	5.58224
BDH2	-1.78815	8.41359	-12.7666	1.40424e-20	7.91354e-19	36.4076
BEND6	1.13575	3.7076	9.8065	3.93512e-15	6.26989e-14	23.9438
BEX1	-4.45969	9.79482	-18.5435	6.63523e-30	8.93023e-27	57.6765
BEX2	-4.01041	10.4235	-14.3081	3.02271e-23	3.95198e-21	42.5048
BEX4	-2.64075	10.2594	-15.8703	8.14701e-26	2.38979e-23	48.3699
BEX5	-3.35405	9.31186	-14.0207	9.28863e-23	1.00367e-20	41.3908
BGN	1.61273	7.54072	9.04495	1.11152e-13	1.32664e-12	20.6267
BHLHE40	1.55513	7.54072	8.32726	2.63073e-12	2.47802e-11	17.4885
BID	1.59361	6.38344	9.44746	1.89479e-14	2.62109e-13	22.3829
BIRC3	1.29454	6.18691	4.1552	8.44684e-05	0.000238362	0.534126
BIRC5	2.17711	5.45791	12.6018	2.7542e-20	1.4257e-18	35.7384
BLM	1.40321	6.06534	8.51326	1.15818e-12	1.15464e-11	18.3018
BMP2	-1.85912	8.47577	-7.08617	6.08751e-10	3.85716e-09	12.102
BMP7	-1.79739	6.93431	-13.7357	2.85539e-22	2.61326e-20	40.2761
BMP8A	-1.20199	6.94642	-8.84931	2.63159e-13	2.92854e-12	19.7715
BMPR1A	-1.22531	7.75503	-12.7506	1.49881e-20	8.34375e-19	36.3428
BNC1	1.57129	3.71145	6.47463	8.47647e-09	4.45536e-08	9.50557
BRD2	-1.03273	9.02981	-9.61512	9.08712e-15	1.33449e-13	23.1126
BRIP1	1.63125	3.88149	9.70157	6.22499e-15	9.49519e-14	23.4882
BSPRY	-2.91404	8.09381	-12.7842	1.30683e-20	7.46469e-19	36.479
BST2	1.27811	7.63841	4.96521	4.1156e-06	1.43456e-05	3.45143
BTBD11	-2.25658	7.45148	-9.26563	4.21043e-14	5.47356e-13	21.5902
BTC	-1.02398	5.59649	-7.07777	6.31366e-10	3.98831e-09	12.066
BTG2	-1.49909	8.51921	-7.47701	1.10685e-10	7.85994e-10	13.7864
BTK	1.13003	5.54629	4.58013	1.78886e-05	5.66806e-05	2.02791
BUB1	1.18889	3.87933	11.8399	6.47074e-19	2.3315e-17	32.6017
BUB1B	3.43796	5.99239	11.8939	5.16236e-19	1.92683e-17	32.8262
BZRAP1	-1.12686	6.29514	-12.0038	3.26263e-19	1.28263e-17	33.2822
C10orf32	-1.6153	9.89525	-12.6333	2.42112e-20	1.27934e-18	35.8664
C11orf52	-3.31268	7.8285	-14.2307	4.08537e-23	4.99857e-21	42.2059
C11orf71	-1.18767	7.27229	-13.7398	2.80945e-22	2.59194e-20	40.2922
C11orf74	-1.65406	8.39376	-8.73349	4.38492e-13	4.70356e-12	19.265
C11orf80	1.35934	4.90223	9.79263	4.18094e-15	6.61091e-14	23.8836
C12orf75	2.60445	6.62708	8.40329	1.88123e-12	1.81672e-11	17.8209
C15orf48	1.6815	7.30188	5.40764	7.14351e-07	2.80349e-06	5.15698
C15orf56	-1.23233	5.58335	-10.8239	4.8022e-17	1.11888e-15	28.3214
C16orf46	-1.36524	6.91388	-15.3466	5.71935e-25	1.29135e-22	46.4392
C16orf89	-5.10899	10.1812	-17.0775	1.04049e-27	5.66817e-25	52.6848
C17orf97	-1.75357	7.40028	-10.8392	4.4965e-17	1.05626e-15	28.3868
C1orf106	1.1075	5.24694	5.32642	9.89689e-07	3.81149e-06	4.83883
C1orf112	1.25623	5.01122	8.07374	8.04317e-12	6.9681e-11	16.3812
C1orf115	-1.10661	6.10147	-10.6233	1.13708e-16	2.49917e-15	27.4648
C1orf116	-1.32245	5.91406	-6.10336	4.07716e-08	1.92898e-07	7.96125
C1orf162	1.84178	7.07359	6.4961	7.73449e-09	4.09357e-08	9.59574
C1orf192	-1.14837	5.04383	-7.17461	4.14415e-10	2.69753e-09	12.4818
C1orf210	-1.21989	6.08844	-7.82328	2.42223e-11	1.925e-10	15.2896
C1orf213	-1.06704	7.1072	-7.68988	4.35289e-11	3.32313e-10	14.7095
C1orf216	1.14834	7.17224	13.0068	5.28975e-21	3.37129e-19	37.3774
C1orf54	1.08351	8.7252	6.89332	1.40399e-09	8.36325e-09	11.2773
C1QA	2.5309	8.13313	8.35278	2.35073e-12	2.22618e-11	17.6
C1QB	2.63848	7.47008	7.57397	7.23811e-11	5.30795e-10	14.2064
C1QC	2.64251	7.8301	8.6619	6.01263e-13	6.28743e-12	18.9519
C1QTNF7	-1.17667	4.84777	-8.2549	3.61949e-12	3.34062e-11	17.1723
C2	1.11894	4.77086	8.5452	1.00598e-12	1.01217e-11	18.4415
C2CD4A	1.19754	3.85215	4.8958	5.38514e-06	1.84477e-05	3.19038
C2orf40	-5.96723	9.93512	-18.6844	4.13731e-30	6.76155e-27	58.1423
C3AR1	2.29019	7.6107	9.54232	1.25005e-14	1.78757e-13	22.7959
C3orf33	-1.78153	5.16212	-9.96428	1.97706e-15	3.33592e-14	24.6275
C3orf52	-1.11221	6.76496	-4.97335	3.98736e-06	1.39177e-05	3.48218
C3orf55	-1.05216	5.60326	-6.37639	1.28751e-08	6.57876e-08	9.09424
C3orf80	1.75487	3.33598	9.35687	2.81996e-14	3.7931e-13	21.9881
C4A	-1.2474	7.60264	-6.24341	2.26117e-08	1.11307e-07	8.54045
C4orf47	-1.13996	6.31184	-8.94868	1.69847e-13	1.95971e-12	20.2059
C4orf48	1.40738	7.28856	8.157	5.57305e-12	4.94998e-11	16.7446
C5AR1	2.33197	6.08417	11.3723	4.63463e-18	1.35428e-16	30.645
C5orf34	1.01818	5.50634	7.82842	2.36814e-11	1.88332e-10	15.3119
C5orf46	1.32327	4.89412	8.47729	1.35733e-12	1.34499e-11	18.1445
C6orf132	-1.78767	5.99563	-10.9849	2.40975e-17	6.03227e-16	29.0067
C7	-1.35396	6.49781	-6.66951	3.68211e-09	2.03987e-08	10.3268
C7orf31	-1.05088	6.38417	-8.05243	8.83497e-12	7.57945e-11	16.2882
C7orf55	-1.30931	8.98132	-8.27823	3.26568e-12	3.03611e-11	17.2742
C8orf31	-1.57443	6.12427	-10.9455	2.85221e-17	7.03977e-16	28.8392
C8orf4	1.19578	7.20128	4.07616	0.000111747	0.00030864	0.266148
C8orf48	-1.27611	6.52304	-7.8573	2.08568e-11	1.67617e-10	15.4377
C9orf116	-1.05007	6.44878	-9.94812	2.1213e-15	3.55571e-14	24.5575
C9orf40	1.07541	6.23195	8.21782	4.26233e-12	3.89154e-11	17.0103
C9orf66	-1.08485	5.15763	-8.38897	2.00388e-12	1.92561e-11	17.7583
CA12	1.16338	6.0745	6.30192	1.76556e-08	8.83745e-08	8.78368
CA2	1.49661	6.58271	5.37691	8.08289e-07	3.15054e-06	5.03639
CA4	-2.48261	7.27936	-12.81	1.17661e-20	6.85011e-19	36.5833
CAAP1	-1.53357	8.62476	-12.1401	1.85044e-19	7.8842e-18	33.8457
CACNA1D	-1.00744	5.3025	-9.87105	2.96879e-15	4.82772e-14	24.2236
CADM1	-1.62806	7.60835	-8.9271	1.86783e-13	2.13041e-12	20.1116
CAMK2N1	1.06048	6.34867	5.07342	2.69735e-06	9.66417e-06	3.86213
CAPN7	-1.38074	8.67986	-12.5471	3.44824e-20	1.75715e-18	35.5151
CAPS	-1.32605	6.58743	-14.1365	5.90219e-23	6.87987e-21	41.8408
CAPSL	-2.59952	6.91741	-11.592	1.83254e-18	5.90544e-17	31.5672
CARD16	1.52326	5.03468	8.63464	6.7807e-13	7.02956e-12	18.8326
CARKD	-1.24306	9.57404	-13.7709	2.48435e-22	2.32008e-20	40.4143
CASC1	-2.67253	5.51427	-15.861	8.43224e-26	2.434e-23	48.3358
CASC3	-1.07592	8.71061	-12.3802	6.85027e-20	3.24501e-18	34.8331
CASC5	1.05117	3.54271	10.3328	3.98802e-16	7.75241e-15	26.218
CASP1	1.74405	6.74729	6.34663	1.46085e-08	7.41112e-08	8.97
CASP4	1.52031	6.07685	8.95042	1.68551e-13	1.9477e-12	20.2135
CAT	-1.11191	8.14209	-13.2923	1.67322e-21	1.25519e-19	38.5205
CAV2	-1.24636	8.75792	-11.259	7.49574e-18	2.0763e-16	30.1672
CBX7	-2.13632	8.76308	-14.6195	9.06745e-24	1.43078e-21	43.6993
CCBE1	1.16982	4.22846	8.28304	3.19719e-12	2.97849e-11	17.2952
CCDC104	-1.23621	9.02744	-8.92991	1.84487e-13	2.10736e-12	20.1239
CCDC109B	1.63433	7.56296	7.19336	3.81922e-10	2.49811e-09	12.5624
CCDC110	-1.52374	5.24496	-8.53985	1.03e-12	1.03407e-11	18.4181
CCDC113	-1.61063	5.73339	-8.42355	1.7204e-12	1.6734e-11	17.9095
CCDC121	-1.41641	4.80867	-9.32457	3.24985e-14	4.31303e-13	21.8472
CCDC146	-2.75851	7.67353	-16.2849	1.78564e-26	6.28545e-24	49.8727
CCDC170	-1.10699	5.86658	-8.90694	2.04135e-13	2.31447e-12	20.0235
CCDC186	-1.01722	6.20434	-11.6168	1.65084e-18	5.37286e-17	31.6709
CCDC28A	-1.4865	9.60971	-13.3321	1.42607e-21	1.09492e-19	38.6792
CCDC8	-1.54077	7.10261	-10.0032	1.66894e-15	2.84965e-14	24.7958
CCDC85A	-1.89929	6.49347	-17.1	9.61134e-28	5.49769e-25	52.7633
CCDC86	1.19725	7.69747	10.2593	5.48365e-16	1.03777e-14	25.9015
CCL13	1.8889	5.07529	10.6718	9.22867e-17	2.05401e-15	27.6723
CCL18	2.42497	7.58529	5.58023	3.5508e-07	1.46356e-06	5.84002
CCL20	2.98857	4.786	11.0098	2.16669e-17	5.48383e-16	29.1124
CCL21	-3.00363	8.86296	-9.96155	2.00074e-15	3.37092e-14	24.6157
CCL28	-2.17977	7.04966	-14.452	1.7305e-23	2.49018e-21	43.0582
CCL3	1.60594	6.66862	4.21344	6.86022e-05	0.000196768	0.733636
CCL8	1.98714	7.07725	6.03993	5.31829e-08	2.47725e-07	7.70034
CCNA1	1.2386	4.13215	5.52723	4.40484e-07	1.79265e-06	5.62931
CCNA2	2.51975	5.25326	9.68761	6.6167e-15	1.00126e-13	23.4276
CCNB1	1.70572	7.48433	8.1943	4.728e-12	4.27575e-11	16.9076
CCNB2	1.11905	4.95812	12	3.31481e-19	1.29646e-17	33.2664
CCNE2	2.05753	4.5319	10.5358	1.65797e-16	3.5255e-15	27.0901
CCNYL2	1.15595	3.53657	7.00267	8.74586e-10	5.38496e-09	11.7444
CCR1	2.65553	5.9336	11.5182	2.50178e-18	7.78785e-17	31.2578
CCR5	1.00273	7.72344	3.80535	0.000284943	0.000730723	-0.62652
CCRL2	1.36051	5.34647	7.6782	4.58177e-11	3.48855e-10	14.6588
CD109	1.72762	5.48458	10.8775	3.81639e-17	9.19148e-16	28.5498
CD14	2.00282	8.83509	8.92619	1.87533e-13	2.1379e-12	20.1076
CD163	2.56774	6.64692	9.77051	4.60504e-15	7.21172e-14	23.7876
CD163L1	1.52584	5.84313	8.59552	8.05761e-13	8.25977e-12	18.6615
CD1A	1.06738	5.059	6.1245	3.73104e-08	1.77587e-07	8.04838
CD200	-1.06019	7.8327	-7.73004	3.64901e-11	2.82823e-10	14.884
CD24	-3.96879	11.5507	-11.1359	1.26519e-17	3.36599e-16	29.647
CD274	1.11279	5.96301	5.02537	3.25568e-06	1.15502e-05	3.67919
CD300A	1.01916	5.02458	7.52512	8.96601e-11	6.48159e-10	13.9947
CD300LF	1.45149	5.63939	7.60915	6.20325e-11	4.60364e-10	14.359
CD302	-1.62518	9.69417	-10.9374	2.95317e-17	7.2811e-16	28.8046
CD33	1.41298	5.24253	10.6266	1.12115e-16	2.4689e-15	27.4789
CD68	1.45989	5.75088	11.5314	2.3663e-18	7.43695e-17	31.3131
CD84	1.02749	5.16373	6.4142	1.09636e-08	5.66631e-08	9.25236
CD86	1.71725	5.55671	7.42452	1.39261e-10	9.70545e-10	13.5593
CD93	1.26447	8.20861	9.34215	3.00832e-14	4.01578e-13	21.9239
CDADC1	-1.08304	6.76385	-8.42758	1.69011e-12	1.64692e-11	17.9271
CDC20	3.45106	6.45877	11.5309	2.37132e-18	7.4425e-17	31.311
CDC37L1	-1.23776	6.77172	-12.5343	3.63369e-20	1.8353e-18	35.4631
CDC42EP3	1.54753	6.99972	12.7263	1.65527e-20	9.03879e-19	36.2442
CDC45	1.95347	5.61245	10.8962	3.52222e-17	8.58236e-16	28.6295
CDC6	2.18656	4.36998	11.3149	5.9136e-18	1.66834e-16	30.4029
CDC7	2.15343	5.62562	11.0214	2.06191e-17	5.23601e-16	29.1616
CDCA2	1.67539	4.80551	10.0941	1.12375e-15	1.98696e-14	25.1887
CDCA3	1.71845	5.84849	9.30689	3.51228e-14	4.62643e-13	21.7702
CDCA4	1.34969	7.63227	9.86868	2.9996e-15	4.86744e-14	24.2134
CDCA5	2.20567	6.69626	12.3082	9.222e-20	4.24546e-18	34.5377
CDCA7	1.60069	4.86731	6.83928	1.7731e-09	1.03712e-08	11.0471
CDCA8	1.45989	6.59988	9.74649	5.11486e-15	7.94456e-14	23.6833
CDH1	-4.06069	9.00566	-12.8233	1.11449e-20	6.50496e-19	36.6372
CDH11	2.46981	6.17127	11.8522	6.14448e-19	2.23507e-17	32.6531
CDH13	1.88648	5.7085	10.2322	6.16694e-16	1.14996e-14	25.7849
CDH16	-3.16361	7.99308	-17.0094	1.32431e-27	6.64545e-25	52.4464
CDH2	1.67272	6.29542	7.71218	3.94679e-11	3.03947e-10	14.8064
CDK1	2.10498	6.03446	9.70108	6.23823e-15	9.50905e-14	23.4861
CDKL2	-1.14046	5.56993	-7.88158	1.87438e-11	1.51754e-10	15.5434
CDKN1A	1.12002	8.51195	4.80159	7.73584e-06	2.59259e-05	2.83908
CDKN2A	1.52741	4.81032	9.12646	7.76458e-14	9.5977e-13	20.9827
CDKN2B	1.27765	3.97205	10.6224	1.14142e-16	2.50631e-15	27.4611
CDKN2C	1.00083	7.32177	6.94497	1.12292e-09	6.78617e-09	11.4977
CDKN3	3.29806	5.33253	10.5834	1.35018e-16	2.9171e-15	27.2941
CDNF	-1.07553	4.77491	-9.4982	1.51675e-14	2.14086e-13	22.6038
CDO1	-1.10928	5.95318	-7.21322	3.50279e-10	2.30497e-09	12.6478
CDON	-1.36182	5.41098	-14.7955	4.61601e-24	8.12419e-22	44.3689
CDR2	-1.12522	9.54474	-12.1378	1.86885e-19	7.9478e-18	33.8359
CDS1	-2.07272	7.42334	-12.2369	1.23892e-19	5.4723e-18	34.2443
CDT1	1.13442	5.41284	9.31121	3.44629e-14	4.54998e-13	21.789
CELSR2	-2.13491	7.99087	-11.7946	7.82227e-19	2.77478e-17	32.4132
CEMIP	1.55816	5.46872	9.30705	3.50984e-14	4.62587e-13	21.7708
CENPA	2.02556	5.38599	10.3012	4.57323e-16	8.76343e-15	26.0819
CENPE	2.35699	4.93865	10.719	7.53245e-17	1.70131e-15	27.8741
CENPF	2.16492	4.79353	14.6898	6.92162e-24	1.13933e-21	43.9671
CENPH	1.68224	5.6428	8.79377	3.36151e-13	3.67294e-12	19.5286
CENPK	3.41401	4.53862	10.5025	1.91411e-16	4.0142e-15	26.9473
CENPL	1.19176	5.36031	8.58972	8.26622e-13	8.43206e-12	18.6362
CENPM	1.85954	5.9623	8.38216	2.06495e-12	1.97883e-11	17.7285
CENPN	1.41526	5.44747	13.1767	2.66284e-21	1.84624e-19	38.0591
CENPU	1.56649	5.33735	8.83284	2.82972e-13	3.13075e-12	19.6995
CENPW	2.64023	6.58417	11.1802	1.04782e-17	2.83381e-16	29.8344
CEP55	3.89638	5.1926	12.175	1.60118e-19	6.91227e-18	33.9895
CEP70	-1.12928	6.68222	-9.32623	3.22628e-14	4.28672e-13	21.8545
CERS4	-1.46845	6.54988	-11.3621	4.83941e-18	1.40337e-16	30.6021
CES1	-1.38515	6.73411	-5.32709	9.87015e-07	3.80248e-06	4.84147
CES2	-1.1745	8.51808	-9.74956	5.04655e-15	7.858e-14	23.6967
CFD	-2.29572	9.39795	-11.205	9.42963e-18	2.57458e-16	29.9391
CGNL1	-1.93403	7.21846	-13.8724	1.66392e-22	1.63393e-20	40.8122
CH25H	1.98401	5.60962	7.93402	1.48815e-11	1.22522e-10	15.7719
CHAC2	1.16987	5.94117	5.77029	1.62958e-07	7.05348e-07	6.60232
CHCHD10	-1.39279	9.98439	-8.19413	4.73161e-12	4.27733e-11	16.9068
CHEK1	1.63458	5.04721	11.8281	6.79907e-19	2.43829e-17	32.5525
CHEK2	1.06649	6.66432	9.69737	6.34038e-15	9.64202e-14	23.47
CHI3L1	1.5153	5.19659	4.39084	3.60607e-05	0.00010859	1.35181
CHMP1B	-1.12438	8.85265	-7.56949	7.3817e-11	5.40805e-10	14.187
CHMP4C	-2.62826	8.14065	-8.97875	1.48771e-13	1.73934e-12	20.3374
CHN1	1.41175	8.46485	7.4967	1.01543e-10	7.25353e-10	13.8716
CHODL	-1.07546	5.47791	-7.50871	9.63394e-11	6.91419e-10	13.9237
CHRDL1	-2.80134	8.62186	-7.7768	2.97132e-11	2.32742e-10	15.0874
CHRFAM7A	-1.06222	6.47375	-6.51427	7.15753e-09	3.80847e-08	9.67207
CHST11	1.43812	6.08181	8.92356	1.89723e-13	2.16178e-12	20.0961
CHSY1	1.25571	9.49742	12.5089	4.03287e-20	1.98862e-18	35.3595
CHSY3	1.42288	5.6109	8.21429	4.3292e-12	3.94315e-11	16.9949
CIPC	-1.34479	7.70225	-11.3059	6.14206e-18	1.72008e-16	30.3652
CITED2	-1.67158	8.34314	-12.9655	6.2533e-21	3.93065e-19	37.2112
CKAP2L	1.96211	5.39804	11.3313	5.5163e-18	1.57373e-16	30.472
CKB	-1.73606	9.12449	-7.03653	7.55155e-10	4.7002e-09	11.8893
CKS2	2.8832	8.45038	9.88894	2.74587e-15	4.48433e-14	24.3012
CLCNKA	-1.92508	6.16386	-11.3231	5.7097e-18	1.61881e-16	30.4377
CLCNKB	-1.70656	7.01427	-11.6448	1.46736e-18	4.85161e-17	31.788
CLDN1	1.42333	6.5976	4.09731	0.000103718	0.000288238	0.337503
CLDN3	-3.5684	9.03694	-13.3628	1.26106e-21	9.81394e-20	38.8014
CLDN7	-1.47372	8.58236	-7.49051	1.04335e-10	7.43672e-10	13.8448
CLDN8	-4.06619	8.33651	-15.541	2.76353e-25	7.02549e-23	47.1599
CLEC11A	1.15483	7.02976	6.84887	1.70121e-09	9.99326e-09	11.0879
CLEC2B	1.0119	6.42857	5.24059	1.3938e-06	5.24079e-06	4.50497
CLEC3B	-2.44429	8.33293	-13.8827	1.598e-22	1.59656e-20	40.8523
CLEC4A	2.42288	5.93078	9.44891	1.88284e-14	2.60771e-13	22.3892
CLEC5A	2.41541	4.76806	10.6319	1.09591e-16	2.41797e-15	27.5015
CLEC7A	1.29327	4.43501	10.4924	2.00004e-16	4.17527e-15	26.9037
CLGN	2.19743	3.83894	6.36778	1.33548e-08	6.80983e-08	9.05826
CLIC3	-5.26845	10.2795	-18.4858	8.05784e-30	1.02424e-26	57.485
CLIC4	1.90513	7.73591	10.8562	4.18081e-17	9.96425e-16	28.4591
CLIC6	-1.49132	7.1694	-7.01304	8.36135e-10	5.1635e-09	11.7887
CLIP2	1.64261	5.77294	10.1999	7.09521e-16	1.30183e-14	25.6455
CLMP	2.40939	5.62697	11.3224	5.72678e-18	1.62164e-16	30.4348
CLN5	-1.95563	9.2492	-14.449	1.75063e-23	2.5034e-21	43.0467
CLU	-2.22906	8.76354	-10.4935	1.99048e-16	4.15909e-15	26.9085
CLUL1	-1.87237	5.97727	-11.3734	4.61392e-18	1.35168e-16	30.6495
CMTM4	-1.78041	8.78227	-11.4182	3.8164e-18	1.13739e-16	30.8381
CNRIP1	1.31819	8.32123	8.15061	5.73229e-12	5.07037e-11	16.7167
CNTN3	-2.63016	6.50022	-10.8918	3.58887e-17	8.72617e-16	28.6108
CNTN4	-2.11935	6.2505	-10.8343	4.59208e-17	1.0754e-15	28.3659
CNTN6	-1.5438	6.30128	-8.54783	9.9441e-13	1.00242e-11	18.453
COBL	-1.76499	6.63475	-9.35503	2.84284e-14	3.82163e-13	21.9801
COL10A1	2.41367	4.64696	9.29076	3.77031e-14	4.94637e-13	21.6998
COL11A1	3.10635	3.93816	12.5811	2.99812e-20	1.54151e-18	35.6541
COL12A1	1.82777	5.29108	14.6073	9.50264e-24	1.48918e-21	43.6528
COL13A1	1.31505	5.7434	11.8603	5.94027e-19	2.16768e-17	32.6867
COL15A1	1.59268	8.53072	7.91681	1.6052e-11	1.3145e-10	15.6969
COL1A1	2.28325	7.8954	13.8779	1.62866e-22	1.60619e-20	40.8334
COL1A2	2.9862	9.7162	16.1134	3.33622e-26	1.09047e-23	49.254
COL23A1	-3.28578	8.26202	-17.6287	1.50913e-28	1.32804e-25	54.5928
COL3A1	2.61901	9.74902	12.2771	1.04893e-19	4.74301e-18	34.4098
COL4A1	1.49582	9.2727	10.4894	2.02567e-16	4.21723e-15	26.891
COL4A2	1.05981	8.80878	7.24253	3.08286e-10	2.04333e-09	12.774
COL4A3BP	-1.24325	9.16033	-10.7644	6.1993e-17	1.41982e-15	28.0676
COL4A4	-1.1095	5.73449	-9.39165	2.42066e-14	3.30064e-13	22.1397
COL5A1	3.22459	6.9406	16.3386	1.46875e-26	5.33414e-24	50.0661
COL5A2	3.17684	7.7977	17.0316	1.22411e-27	6.36539e-25	52.5241
COL5A3	1.7751	6.1403	10.5859	1.33592e-16	2.88903e-15	27.3047
COL6A2	1.72351	7.71183	11.4805	2.93269e-18	9.00399e-17	31.0999
COL6A3	2.61267	10.1878	13.2057	2.36962e-21	1.67508e-19	38.175
COL7A1	1.55005	5.93763	12.1076	2.1178e-19	8.88659e-18	33.7116
COL9A3	-3.33701	7.8622	-9.16297	6.6126e-14	8.25853e-13	21.1421
COLCA2	-1.93935	5.97912	-11.8477	6.2619e-19	2.27416e-17	32.6343
COLEC11	-1.58394	7.10044	-11.3642	4.79756e-18	1.39477e-16	30.6107
COLGALT1	1.47595	6.81893	14.3383	2.68809e-23	3.55512e-21	42.6212
COMP	1.85678	5.13545	7.13352	4.95517e-10	3.18467e-09	12.3053
CORO1C	2.16801	8.61134	14.1387	5.85112e-23	6.87987e-21	41.8494
CORO6	-1.16609	6.92971	-4.62764	1.49685e-05	4.80876e-05	2.20013
COX7A1	-1.81228	9.05571	-9.90379	2.5736e-15	4.22914e-14	24.3655
CPA3	2.37155	4.90629	8.59165	8.19631e-13	8.38318e-12	18.6446
CPE	-1.9719	10.452	-10.2436	5.86994e-16	1.10357e-14	25.8339
CPEB3	-1.38195	6.01366	-14.5838	1.04052e-23	1.58714e-21	43.5628
CPEB4	-1.07805	7.32486	-8.69309	5.23997e-13	5.54279e-12	19.0883
CPQ	-2.32538	10.5014	-16.352	1.39937e-26	5.24878e-24	50.114
CPVL	-1.45308	10.1183	-9.82125	3.68962e-15	5.89927e-14	24.0077
CPXM1	-1.60465	7.92153	-6.69776	3.26148e-09	1.82508e-08	10.4463
CRABP1	-2.04438	6.14078	-15.3616	5.4053e-25	1.23673e-22	46.4951
CREB3L1	1.04125	5.5887	12.0487	2.70665e-19	1.09029e-17	33.4678
CREBL2	-1.08511	9.57901	-11.93	4.43917e-19	1.68999e-17	32.9762
CREBRF	-1.3861	8.25344	-13.8552	1.78077e-22	1.73379e-20	40.7448
CRELD1	-1.05411	7.74435	-9.45067	1.86835e-14	2.59079e-13	22.3968
CRISPLD1	-1.66848	7.99654	-6.00875	6.05844e-08	2.79978e-07	7.57245
CRNDE	2.61034	6.04032	11.3024	6.23555e-18	1.74412e-16	30.3502
CROT	-1.10494	6.57295	-9.60008	9.70572e-15	1.41534e-13	23.0472
CRY2	-1.42621	8.12391	-13.9487	1.23242e-22	1.26447e-20	41.1101
CRYAB	-2.4396	10.0699	-10.0034	1.66695e-15	2.84838e-14	24.797
CRYBG3	-1.79357	9.73158	-11.9285	4.46749e-19	1.69794e-17	32.9698
CRYGN	-1.9751	7.07966	-13.0165	5.08708e-21	3.26029e-19	37.4162
CRYL1	-1.07726	8.21861	-9.18299	6.05522e-14	7.62065e-13	21.2295
CRYZ	-1.07776	10.073	-6.81677	1.95394e-09	1.13494e-08	10.9514
CSF1R	2.25874	7.54602	11.6448	1.46723e-18	4.85161e-17	31.7881
CSF2RB	1.67728	6.93539	4.44236	2.9841e-05	9.12296e-05	1.53417
CSGALNACT1	-3.06952	10.1661	-17.3454	4.05296e-28	2.56525e-25	53.6168
CSPG4	1.64142	4.80175	8.39688	1.93518e-12	1.8643e-11	17.7929
CST6	-1.84757	7.67292	-6.54213	6.35445e-09	3.40571e-08	9.78925
CSTA	2.37678	6.74659	5.55078	4.003e-07	1.63697e-06	5.72282
CTAGE4	-1.09928	7.31901	-8.23655	3.92456e-12	3.6004e-11	17.0921
CTC-428G20.3	-1.10051	7.23579	-9.84172	3.37422e-15	5.4253e-14	24.0965
CTC-429P9.3	-1.21626	7.56016	-12.6032	2.7393e-20	1.42121e-18	35.7438
CTD-2292M16.8	-1.38661	7.57545	-7.08074	6.2329e-10	3.94273e-09	12.0787
CTD-2554C21.3	-1.37916	5.70995	-11.1058	1.43842e-17	3.7742e-16	29.5195
CTHRC1	4.08998	8.69319	17.0069	1.33606e-27	6.64545e-25	52.4376
CTNNAL1	-1.27072	10.3929	-8.77858	3.5943e-13	3.90863e-12	19.4622
CTPS1	1.90036	6.62117	11.7624	8.95209e-19	3.09401e-17	32.2791
CTSA	1.31744	9.07142	12.0947	2.23531e-19	9.282e-18	33.6579
CTSC	1.89991	7.56351	9.81132	3.85317e-15	6.15217e-14	23.9647
CTSF	-1.01105	8.50093	-10.439	2.51827e-16	5.10347e-15	26.6747
CTSK	1.62537	8.83275	5.97447	6.98989e-08	3.19666e-07	7.43212
CTSO	-1.40893	8.74249	-11.8225	6.96021e-19	2.49217e-17	32.5292
CTSS	1.45443	7.77086	5.22751	1.46814e-06	5.50222e-06	4.45434
CTTNBP2	-1.41812	5.88322	-8.38013	2.08357e-12	1.99465e-11	17.7196
CUX2	-1.29493	5.01223	-8.08791	7.55639e-12	6.56769e-11	16.4431
CWH43	-3.02421	6.99793	-12.7696	1.38705e-20	7.85535e-19	36.4198
CXADR	-2.73439	8.24094	-11.8444	6.34878e-19	2.29479e-17	32.6206
CXCL1	2.30671	4.52951	9.39529	2.3823e-14	3.25222e-13	22.1556
CXCL16	1.16321	7.54279	7.61399	6.07313e-11	4.52027e-10	14.38
CXCL3	1.82709	4.90419	7.18565	3.94972e-10	2.57904e-09	12.5292
CXCL5	2.42277	3.57874	10.2682	5.27536e-16	1.00333e-14	25.94
CXCL6	1.896	3.38336	6.11323	3.91173e-08	1.85608e-07	8.00193
CXCL8	3.16511	5.55349	9.82651	3.6058e-15	5.78141e-14	24.0306
CYB5D1	-1.84882	8.38312	-14.1909	4.77108e-23	5.80651e-21	42.0519
CYB5D2	-1.48398	8.23863	-14.5869	1.0281e-23	1.58017e-21	43.5747
CYBRD1	-1.72255	10.1062	-11.6539	1.41185e-18	4.6816e-17	31.8264
CYP1B1	1.24258	5.98747	5.32308	1.00302e-06	3.85697e-06	4.82578
CYP39A1	-1.8214	6.1296	-11.1676	1.10554e-17	2.97586e-16	29.7811
CYP4B1	-1.28475	6.42745	-5.91777	8.85035e-08	3.97753e-07	7.20064
CYP4X1	-1.75182	5.45905	-8.89329	2.16787e-13	2.44942e-12	19.9638
CYR61	-1.03422	10.9183	-3.85738	0.000238714	0.000620304	-0.458164
CYS1	-1.81996	7.12556	-5.12105	2.23688e-06	8.12895e-06	4.04426
CYTL1	1.00255	4.92143	4.60082	1.65543e-05	5.2804e-05	2.1028
DAB2	1.11677	6.79676	10.2707	5.21834e-16	9.93307e-15	25.9508
DAPK2	-1.73635	7.30571	-7.6958	4.24123e-11	3.24763e-10	14.7352
DAPL1	-1.62618	7.30056	-4.70814	1.10441e-05	3.61968e-05	2.49424
DBF4	1.39721	6.98289	7.78038	2.92494e-11	2.29423e-10	15.1029
DCAF12L1	-1.00039	4.59334	-7.78709	2.83989e-11	2.23364e-10	15.1321
DCAF17	-1.06272	6.34659	-9.21906	5.16689e-14	6.58312e-13	21.387
DCLRE1B	1.09139	6.37657	11.8182	7.08544e-19	2.52123e-17	32.5115
DCSTAMP	1.22289	4.4818	4.08192	0.000109503	0.000302847	0.285556
DDAH2	-1.07839	8.76566	-9.47688	1.6654e-14	2.32912e-13	22.511
DDB2	1.27668	6.41385	8.76336	3.84369e-13	4.16005e-12	19.3957
DDIAS	2.13231	5.1069	11.4422	3.44793e-18	1.03801e-16	30.939
DDIT4	2.04523	8.94494	7.64447	5.31287e-11	3.99469e-10	14.5123
DDR1	-1.96339	9.5423	-9.92131	2.38436e-15	3.94748e-14	24.4414
DDX19B	-1.11986	7.19692	-11.9629	3.86908e-19	1.48531e-17	33.1128
DDX25	-2.33373	6.66127	-13.9339	1.3063e-22	1.33429e-20	41.0524
DDX39A	1.3037	8.77453	7.86479	2.01808e-11	1.62618e-10	15.4703
DEPDC1	2.94563	4.33999	12.0138	3.12977e-19	1.23464e-17	33.3235
DEPDC1B	2.38197	3.85792	9.72159	5.70294e-15	8.77493e-14	23.5752
DEPDC7	2.26626	3.88422	10.7657	6.1646e-17	1.41329e-15	28.0732
DEPTOR	-1.84529	7.02003	-12.4945	4.27888e-20	2.0919e-18	35.3007
DGKI	-3.35469	7.34206	-12.7994	1.22848e-20	7.06219e-19	36.5404
DHCR24	1.22919	7.14021	6.6789	3.53672e-09	1.9679e-08	10.3664
DHRS11	-1.16664	6.5642	-6.60187	4.92119e-09	2.67896e-08	10.041
DHRS3	-1.30257	8.54748	-9.74296	5.19433e-15	8.04646e-14	23.668
DHRS7	-1.0504	7.38828	-12.6287	2.46706e-20	1.30061e-18	35.8478
DHRS7B	-1.02266	8.39823	-9.70979	6.00513e-15	9.17205e-14	23.524
DIAPH3	1.38483	4.22135	12.6801	1.99942e-20	1.07639e-18	36.0566
DIO1	-6.17323	10.2543	-14.1368	5.89401e-23	6.87987e-21	41.8422
DIO2	-2.94562	8.98578	-15.5181	3.0101e-25	7.56826e-23	47.0752
DIRAS2	-1.61535	4.96649	-8.81101	3.11548e-13	3.42538e-12	19.604
DISP1	-1.00233	6.66751	-7.27104	2.72253e-10	1.81714e-09	12.8968
DKFZP434I0714	-1.03345	7.88771	-8.10935	6.87537e-12	6.01102e-11	16.5366
DKK1	3.08885	4.99831	7.71191	3.9515e-11	3.04207e-10	14.8052
DKK3	1.07559	6.00276	5.89512	9.72359e-08	4.34523e-07	7.10837
DLEU2	1.05617	4.15699	10.0704	1.24558e-15	2.17548e-14	25.0865
DLG2	-2.52653	6.09313	-14.8475	3.78498e-24	6.81892e-22	44.5657
DLGAP5	4.25599	5.26959	11.704	1.14408e-18	3.86657e-17	32.0353
DMKN	-2.61087	7.69764	-10.4217	2.71405e-16	5.46151e-15	26.6004
DMRT3	-1.08146	5.52622	-7.18531	3.95558e-10	2.58213e-09	12.5278
DMXL2	1.04347	6.50014	11.8414	6.42876e-19	2.32003e-17	32.6082
DNA2	1.19271	5.33735	8.01325	1.04988e-11	8.87377e-11	16.1173
DNAJB2	-1.08569	8.28327	-10.8037	5.23727e-17	1.20917e-15	28.2352
DNAJB4	-1.29926	8.70573	-6.98222	9.55641e-10	5.8494e-09	11.6569
DNAJB9	-1.33238	9.43625	-10.8872	3.66026e-17	8.87148e-16	28.5913
DNAJC12	1.1121	4.27262	7.67286	4.69055e-11	3.56307e-10	14.6356
DNAJC3	-1.09757	8.74698	-8.95476	1.6536e-13	1.91663e-12	20.2325
DNAJC3-AS1	-1.29543	5.23423	-13.9106	1.43173e-22	1.44309e-20	40.9613
DNALI1	-2.74101	7.00797	-19.1877	7.79686e-31	1.4866e-27	59.787
DNER	1.42848	3.61594	4.9923	3.70388e-06	1.29877e-05	3.55384
DNM1	1.49138	5.40278	9.43122	2.0348e-14	2.79784e-13	22.3121
DNM3OS	1.11858	4.48681	6.82955	1.84917e-09	1.07849e-08	11.0057
DNMT1	1.3954	8.46635	9.92022	2.39572e-15	3.96055e-14	24.4367
DOCK10	1.38639	4.69135	7.59106	6.71559e-11	4.94856e-10	14.2805
DOCK3	-1.83929	6.46003	-9.22444	5.0462e-14	6.44651e-13	21.4104
DOCK4	1.18969	5.08011	11.629	1.56832e-18	5.12615e-17	31.7219
DOK2	1.27415	5.88079	8.71712	4.71299e-13	5.02719e-12	19.1934
DOK3	1.01011	5.37362	5.84396	1.20206e-07	5.30744e-07	6.90047
DONSON	1.68527	6.36231	9.66058	7.44754e-15	1.11372e-13	23.3102
DPP4	1.57217	5.64792	6.8737	1.52822e-09	9.04441e-09	11.1937
DPP6	-2.22035	6.76302	-14.1135	6.45625e-23	7.42964e-21	41.7518
DPT	-2.22108	7.99784	-9.77854	4.44623e-15	6.99173e-14	23.8225
DPY19L2	-1.64086	6.46402	-7.87089	1.9646e-11	1.58559e-10	15.4969
DPY19L2P2	-1.03114	5.74442	-6.22889	2.40411e-08	1.17862e-07	8.48019
DPYSL3	1.24028	6.22519	9.38959	2.44266e-14	3.32271e-13	22.1307
DQ592230	-1.61576	6.73286	-6.21666	2.53136e-08	1.23623e-07	8.42951
DQ597730	-1.16474	7.2065	-8.21856	4.2485e-12	3.88178e-11	17.0135
DRAM1	1.27744	7.62226	6.30235	1.76237e-08	8.8234e-08	8.78546
DSN1	1.11596	6.44705	10.1725	7.99101e-16	1.45222e-14	25.5274
DSP	-2.25814	10.9855	-7.6522	5.13563e-11	3.86779e-10	14.5459
DTL	2.39108	5.83447	11.0691	1.68183e-17	4.32362e-16	29.3641
DUOX1	-1.27598	5.60357	-10.4628	2.2727e-16	4.66781e-15	26.7767
DUOX2	-5.1269	8.88967	-17.2037	6.6653e-28	4.01321e-25	53.1251
DUOXA1	-1.94715	7.15116	-13.9659	1.15165e-22	1.19507e-20	41.1774
DUOXA2	-2.38456	7.31753	-14.024	9.16734e-23	9.98803e-21	41.4038
DUSP1	-1.19122	8.79059	-7.32714	2.13127e-10	1.44313e-09	13.1387
DUSP14	-1.7299	9.42598	-10.5539	1.53361e-16	3.28549e-15	27.1676
DUSP4	1.47562	5.77408	7.00528	8.64757e-10	5.32588e-09	11.7555
DUSP5	1.05838	7.63539	3.99671	0.000147613	0.000398417	8.53118e-05
DUXAP10	2.92001	3.96053	13.8619	1.73444e-22	1.6959e-20	40.771
DYNLRB2	-2.39261	6.41278	-14.0024	9.97883e-23	1.06193e-20	41.3197
DYX1C1	-1.36759	6.68609	-10.1336	9.46283e-16	1.69945e-14	25.3595
DZIP1	1.56114	5.1135	9.34333	2.99273e-14	3.9973e-13	21.9291
DZIP3	-1.16407	7.10774	-10.7456	6.71931e-17	1.52669e-15	27.9876
E2F5	-1.08872	7.3525	-7.76573	3.1195e-11	2.43598e-10	15.0392
E2F7	2.12721	4.44277	14.0276	9.03738e-23	9.89355e-21	41.418
E2F8	1.98811	3.93845	8.33836	2.50501e-12	2.36544e-11	17.537
EBAG9	-1.42788	9.72745	-12.7482	1.51346e-20	8.40485e-19	36.3332
EBF4	-1.02618	6.44148	-8.50005	1.22769e-12	1.22022e-11	18.244
EBLN3	-1.01111	9.26374	-9.68564	6.67409e-15	1.00861e-13	23.4191
ECHDC2	-1.36806	8.67751	-7.18619	3.94038e-10	2.57441e-09	12.5316
ECHDC3	-1.72267	8.62472	-10.8546	4.21026e-17	1.0024e-15	28.4522
ECI1	-1.67404	9.21474	-11.6106	1.6945e-18	5.49931e-17	31.645
ECM1	2.19162	6.60588	8.3691	2.18744e-12	2.08536e-11	17.6714
ECT2	1.32111	4.87835	12.1069	2.12455e-19	8.88659e-18	33.7084
EDIL3	1.50093	5.14184	10.2991	4.61387e-16	8.82654e-15	26.0731
EDN3	-2.681	6.31033	-13.2148	2.2848e-21	1.64909e-19	38.2112
EDNRA	1.91317	6.92949	8.76203	3.86637e-13	4.18064e-12	19.3898
EDNRB	-1.40723	7.41319	-9.44181	1.94239e-14	2.68208e-13	22.3582
EFCAB2	-1.0365	6.15905	-8.50262	1.21383e-12	1.20802e-11	18.2553
EFEMP1	-1.54719	8.28042	-8.40322	1.88183e-12	1.81672e-11	17.8206
EFNA1	-1.33638	9.08292	-6.77769	2.31239e-09	1.32468e-08	10.7853
EGFL6	2.08365	4.30307	9.96846	1.94142e-15	3.28791e-14	24.6456
EGLN3	1.33161	4.80857	7.67548	4.63698e-11	3.52707e-10	14.6469
EGR1	-1.42571	10.7786	-7.6185	5.95415e-11	4.44038e-10	14.3996
EGR2	-2.56962	9.57532	-8.66016	6.05893e-13	6.32717e-12	18.9443
EGR3	-1.53865	8.31041	-4.34397	4.27972e-05	0.000127218	1.18698
EIF3J-AS1	-1.35081	7.55292	-10.235	6.09228e-16	1.13975e-14	25.797
EIF4A1	1.00169	9.76423	8.54959	9.8672e-13	9.95421e-12	18.4606
EIF4E3	-1.49062	7.28657	-12.2262	1.29497e-19	5.68742e-18	34.2004
EIF4EBP1	2.52898	6.60458	16.0192	4.71115e-26	1.45664e-23	48.9123
ELAC1	-1.27708	6.25628	-13.1257	3.27067e-21	2.2065e-19	37.8549
ELF4	1.71124	5.97484	9.95124	2.09269e-15	3.51806e-14	24.571
ELMO1	-2.3682	8.19412	-13.0842	3.86743e-21	2.55742e-19	37.6884
ELMO3	-1.61275	6.78528	-9.77474	4.52071e-15	7.08936e-14	23.806
ELOVL4	1.25167	4.54222	7.461	1.18718e-10	8.38871e-10	13.7171
ELOVL6	1.86216	4.75029	16.2171	2.28518e-26	7.68897e-24	49.6286
ELOVL7	-2.77766	7.91527	-9.1049	8.53736e-14	1.04906e-12	20.8885
ELTD1	1.12171	7.88028	5.30343	1.08498e-06	4.15192e-06	4.74916
EMCN	-1.91801	7.85513	-12.5379	3.57994e-20	1.81616e-18	35.4779
EMILIN1	1.8248	5.58824	10.2077	6.85887e-16	1.26353e-14	25.6792
EML6	-1.5721	5.7094	-14.1522	5.54926e-23	6.64749e-21	41.902
EMP3	1.72392	8.61959	9.00843	1.30547e-13	1.54124e-12	20.4671
EMR1	1.4782	5.4367	9.30642	3.51954e-14	4.63332e-13	21.7681
EMR2	1.22378	4.12032	9.65539	7.61855e-15	1.13559e-13	23.2876
ENC1	1.48339	6.52889	10.2951	4.6951e-16	8.97443e-15	26.0558
ENO1	1.02743	7.97558	11.5172	2.51181e-18	7.80237e-17	31.2538
ENOSF1	-1.10859	8.13263	-8.12701	6.36047e-12	5.58862e-11	16.6137
ENOX1	1.02968	4.76449	9.64604	7.93701e-15	1.17845e-13	23.2469
ENPP2	1.60303	8.24908	6.07	4.68921e-08	2.20125e-07	7.82392
ENPP4	-1.35814	7.78058	-8.16732	5.32528e-12	4.75576e-11	16.7897
ENPP5	-3.48585	7.73895	-10.9803	2.4583e-17	6.14037e-16	28.9869
ENTPD1	1.33466	6.53398	6.19937	2.72286e-08	1.32102e-07	8.35784
EOGT	1.33954	6.75076	7.93821	1.46092e-11	1.2054e-10	15.7902
EPB41L4A-AS2	-1.10568	5.56369	-9.04091	1.13147e-13	1.34763e-12	20.609
EPB41L4B	-1.72045	6.20873	-15.5078	3.12725e-25	7.69372e-23	47.0374
EPB41L5	-1.9442	6.68872	-14.9976	2.13652e-24	4.14268e-22	45.1328
EPC2	-1.09436	8.56301	-10.3942	3.05733e-16	6.09305e-15	26.482
EPCAM	-4.25887	11.2949	-10.1869	7.50801e-16	1.37317e-14	25.5894
EPHA3	-1.14858	5.04358	-11.0166	2.10512e-17	5.33981e-16	29.141
EPHA4	-1.63067	6.62895	-9.60793	9.37796e-15	1.37279e-13	23.0813
EPHB1	-1.33028	6.9745	-6.86346	1.59732e-09	9.41927e-09	11.1501
EPHB6	-1.61356	7.30617	-11.448	3.36537e-18	1.01717e-16	30.9631
EPHX1	-1.1668	8.61921	-7.31742	2.22366e-10	1.50436e-09	13.0968
EPHX2	-2.95974	7.36064	-17.965	4.73013e-29	5.44507e-26	55.7385
EPS8L1	-1.00116	6.83054	-9.26721	4.18134e-14	5.43883e-13	21.5971
EPSTI1	1.00006	6.73244	3.71228	0.000389727	0.000974958	-0.923755
EPYC	1.20024	3.09804	4.26588	5.68073e-05	0.000165048	0.914756
ERCC6L	1.46621	4.30485	9.46702	1.73902e-14	2.42614e-13	22.4681
ERLIN2	-1.55256	7.89475	-13.0456	4.52192e-21	2.95056e-19	37.5332
ERMP1	-1.21076	8.84088	-9.1868	5.95449e-14	7.51041e-13	21.2461
ERO1L	1.19229	8.1448	9.58364	1.04304e-14	1.50947e-13	22.9757
ERO1LB	-1.7475	7.03218	-12.9238	7.40623e-21	4.50677e-19	37.0431
ERP27	-1.59735	7.04048	-6.22594	2.43419e-08	1.19234e-07	8.46798
ESAM	-1.66764	8.59813	-11.6228	1.60942e-18	5.25299e-17	31.6962
ESM1	2.3267	5.31424	11.066	1.70493e-17	4.37808e-16	29.3505
ESPL1	1.35923	5.66578	11.9147	4.73172e-19	1.78945e-17	32.9127
ESRP1	-2.74164	8.11696	-9.5809	1.05563e-14	1.52673e-13	22.9637
ESRP2	-1.75294	6.97592	-9.08342	9.38397e-14	1.14144e-12	20.7947
ESRRG	-2.6878	6.76712	-14.7441	5.621e-24	9.74307e-22	44.1736
ETHE1	1.00261	8.33837	7.27771	2.64436e-10	1.77049e-09	12.9256
EVA1A	2.28878	5.75804	11.5156	2.52925e-18	7.83993e-17	31.2469
EVI2A	2.15515	6.82484	5.23044	1.45116e-06	5.44482e-06	4.46567
EVI2B	1.5642	7.26366	3.82857	0.00026334	0.000679128	-0.551565
EXO1	1.49945	5.09631	10.4499	2.40255e-16	4.89496e-15	26.7215
EXOC6	-1.27683	6.75186	-12.4631	4.8701e-20	2.36212e-18	35.1721
EYA2	-1.8538	7.06609	-10.2281	6.27849e-16	1.1679e-14	25.767
EZH2	2.695	5.14096	8.92249	1.90619e-13	2.17091e-12	20.0914
F11R	-1.14612	8.46485	-7.99947	1.11557e-11	9.38732e-11	16.0572
F13A1	2.38587	8.05764	10.0813	1.18807e-15	2.0814e-14	25.1334
F2R	1.15511	6.50972	11.9686	3.77913e-19	1.45567e-17	33.1361
F2RL2	1.1047	3.51016	9.24739	4.5619e-14	5.88367e-13	21.5106
FAAH	-1.77072	7.07743	-13.5259	6.57029e-22	5.56771e-20	39.4487
FABP4	-1.57173	6.76805	-7.27767	2.64489e-10	1.77049e-09	12.9254
FABP5	1.47042	9.45871	7.17173	4.19644e-10	2.72846e-09	12.4694
FADS1	1.75034	6.82399	14.2573	3.68387e-23	4.63116e-21	42.3086
FAIM	-1.17686	8.44405	-8.11705	6.6458e-12	5.81921e-11	16.5702
FAM107A	-1.2822	7.17502	-6.76523	2.43988e-09	1.39387e-08	10.7324
FAM110C	-3.09823	7.24602	-10.97	2.56856e-17	6.39484e-16	28.9433
FAM117A	-1.58972	8.33197	-13.4764	8.00688e-22	6.61362e-20	39.2524
FAM122A	-1.00081	7.21494	-13.139	3.10088e-21	2.10528e-19	37.9078
FAM126A	1.16143	5.73861	10.828	4.71738e-17	1.10249e-15	28.3391
FAM129A	1.11038	7.78818	6.12071	3.79091e-08	1.80287e-07	8.03274
FAM133A	1.11408	3.88415	4.21027	6.93863e-05	0.000198768	0.722732
FAM13A	-1.07784	7.79192	-10.2445	5.84645e-16	1.10006e-14	25.8379
FAM13B	-1.27527	9.07854	-13.6954	3.34988e-22	3.0057e-20	40.1175
FAM155A	1.04179	4.08882	6.06022	4.88529e-08	2.28626e-07	7.7837
FAM155B	-1.72227	7.21045	-8.98954	1.41869e-13	1.6663e-12	20.3845
FAM167A	-1.72191	7.69409	-11.6178	1.64415e-18	5.3587e-17	31.675
FAM169A	-2.74296	7.27799	-13.4332	9.51524e-22	7.7329e-20	39.081
FAM174B	-1.75544	8.20424	-13.7318	2.90002e-22	2.64352e-20	40.2607
FAM189A1	-1.24976	5.792	-6.89637	1.38563e-09	8.27114e-09	11.2903
FAM189A2	-3.91776	9.105	-15.7437	1.30101e-25	3.5864e-23	47.9063
FAM198B	1.00565	6.90151	7.04631	7.23756e-10	4.52694e-09	11.9312
FAM20A	1.13434	5.33849	5.38393	7.85813e-07	3.06816e-06	5.06391
FAM213A	-1.4013	9.30801	-8.8777	2.32209e-13	2.61206e-12	19.8956
FAM214A	-1.53438	7.71393	-12.5672	3.17501e-20	1.6288e-18	35.5971
FAM218A	-1.01987	5.34928	-7.36425	1.81237e-10	1.24302e-09	13.2989
FAM225A	1.15421	4.56733	9.18933	5.8887e-14	7.43973e-13	21.2572
FAM226A	-1.2796	4.83964	-9.03732	1.14952e-13	1.36771e-12	20.5933
FAM24B	1.0843	5.56255	7.27536	2.67163e-10	1.78786e-09	12.9154
FAM26F	1.17622	5.67765	4.66683	1.2913e-05	4.18779e-05	2.34297
FAM3B	-2.22165	7.23616	-7.45085	1.24109e-10	8.72656e-10	13.6732
FAM46B	-1.04923	6.56293	-4.86666	6.0258e-06	2.05072e-05	3.08132
FAM46C	-2.24158	7.95284	-13.3814	1.1704e-21	9.20234e-20	38.8754
FAM49A	-1.3606	8.17006	-9.97301	1.90327e-15	3.22569e-14	24.6653
FAM50B	-1.09372	8.09944	-10.3715	3.37263e-16	6.67524e-15	26.3845
FAM64A	1.38563	5.02783	13.7386	2.8232e-22	2.59417e-20	40.2874
FAM72A	3.54777	5.77835	10.217	6.58668e-16	1.21731e-14	25.7194
FAM81B	-1.84177	4.88394	-9.04509	1.11088e-13	1.32656e-12	20.6272
FAM83B	-1.10032	4.95205	-7.41461	1.45431e-10	1.00893e-09	13.5165
FAM83D	3.4366	5.27481	13.159	2.86051e-21	1.96542e-19	37.988
FAM8A1	-1.42671	10.1179	-12.5522	3.37559e-20	1.72396e-18	35.5363
FANCI	1.95482	5.08581	11.5188	2.49479e-18	7.7873e-17	31.2606
FANK1	-1.64956	6.67673	-10.0574	1.31794e-15	2.29486e-14	25.0303
FAP	3.33602	6.581	16.7575	3.24829e-27	1.48642e-24	51.559
FAR2P2	-2.4121	7.33493	-11.9058	4.91132e-19	1.84215e-17	32.8757
FAT4	-1.17095	7.53689	-8.95134	1.67868e-13	1.94162e-12	20.2175
FAXDC2	-1.15586	8.24821	-11.4105	3.94365e-18	1.17335e-16	30.8055
FBLN2	-1.16562	7.50998	-6.73309	2.80187e-09	1.58641e-08	10.596
FBLN5	-2.03161	7.7793	-9.22916	4.94258e-14	6.32473e-13	21.431
FBXL16	-1.29083	6.08946	-12.4969	4.23692e-20	2.08027e-18	35.3105
FBXL2	-1.0719	7.93692	-7.31755	2.22242e-10	1.50397e-09	13.0973
FBXL4	-1.12089	6.67531	-10.3308	4.02196e-16	7.79192e-15	26.2095
FBXO15	-1.01225	6.6923	-7.96669	1.2888e-11	1.07319e-10	15.9143
FBXO16	-1.06871	7.24943	-8.46501	1.43286e-12	1.41493e-11	18.0908
FBXO30	-1.01541	7.35008	-9.80313	3.99338e-15	6.35828e-14	23.9292
FBXO34	-1.04334	9.40022	-10.0422	1.40838e-15	2.43014e-14	24.9644
FBXW4	-1.03256	8.32618	-9.45581	1.82664e-14	2.53601e-13	22.4192
FCER1G	2.8362	6.87449	9.34519	2.96841e-14	3.96944e-13	21.9372
FCGBP	-4.42218	10.9105	-14.4424	1.79552e-23	2.55165e-21	43.0216
FCGR1A	1.13235	4.97167	7.8412	2.23863e-11	1.79091e-10	15.3676
FCGR1B	1.86912	6.42166	7.16478	4.32519e-10	2.805e-09	12.4395
FCGR2A	1.19618	4.70793	11.0433	1.87831e-17	4.80176e-16	29.2543
FCGR2B	2.01216	6.18164	7.88538	1.84331e-11	1.4945e-10	15.56
FCGR2C	1.47419	6.08279	10.4722	2.18236e-16	4.49438e-15	26.817
FCGR3A	2.4196	5.71334	7.63425	5.55663e-11	4.16293e-10	14.4679
FCGR3B	2.06043	5.92419	9.48778	1.58771e-14	2.23137e-13	22.5584
FCN1	1.01599	5.25744	4.37855	3.77203e-05	0.000113097	1.30849
FDX1	-1.14663	8.8797	-11.5081	2.61e-18	8.06983e-17	31.2157
FEN1	1.59944	7.01704	10.0741	1.22548e-15	2.14246e-14	25.1026
FERMT3	1.29551	6.79637	5.18192	1.75904e-06	6.51242e-06	4.27823
FGF13	-1.26133	7.3742	-4.42348	3.1989e-05	9.72376e-05	1.4672
FGF14-AS2	-2.02452	6.0148	-17.0795	1.03321e-27	5.66817e-25	52.6918
FGFBP3	-1.02177	5.38777	-8.25703	3.58564e-12	3.31205e-11	17.1816
FGFR2	-1.19993	5.68756	-14.5056	1.40671e-23	2.05003e-21	43.2637
FGR	1.09729	6.47613	6.75596	2.53924e-09	1.44558e-08	10.693
FHDC1	-2.6274	8.88793	-16.8782	2.11134e-27	1.0064e-24	51.9851
FHIT	-1.34328	6.8481	-10.8089	5.12099e-17	1.18352e-15	28.2575
FHL1	-2.2994	10.0563	-13.0659	4.16457e-21	2.73809e-19	37.6149
FHL3	1.02266	6.57011	10.8366	4.54808e-17	1.06619e-15	28.3755
FHOD3	1.03084	6.16593	5.38456	7.83827e-07	3.06093e-06	5.06638
FJX1	2.59444	6.47144	14.5594	1.14286e-23	1.69741e-21	43.4697
FKBP14	1.53279	6.42757	11.2343	8.32675e-18	2.29261e-16	30.0628
FKBP1A-SDCBP2	-1.00189	7.96594	-9.91981	2.39998e-15	3.96187e-14	24.4349
FKBP2	-1.21248	9.79517	-11.1009	1.46866e-17	3.84898e-16	29.4988
FLJ32255	1.19864	4.46126	5.71331	2.06015e-07	8.80391e-07	6.37272
FLNA	1.56365	8.51375	9.76527	4.71184e-15	7.36889e-14	23.7648
FLRT1	-1.56461	6.53785	-10.7505	6.57967e-17	1.49794e-15	28.0085
FLRT3	-1.83462	7.21215	-6.68697	3.41626e-09	1.90597e-08	10.4006
FMO2	-1.18466	6.68484	-5.97231	7.05318e-08	3.22175e-07	7.42328
FMOD	-2.3386	9.77886	-15.2867	7.1627e-25	1.57579e-22	46.2161
FN1	3.17639	8.4094	17.5184	2.21396e-28	1.7566e-25	54.2142
FNBP1L	-1.23227	9.70367	-6.99709	8.96007e-10	5.50944e-09	11.7205
FNDC1	-2.84619	9.03697	-10.6514	1.00769e-16	2.22762e-15	27.5849
FOLH1	1.00812	4.53282	10.2202	6.49773e-16	1.20184e-14	25.7329
FOLR1	-3.31801	8.4519	-13.3052	1.58849e-21	1.19554e-19	38.5721
FOS	-2.67954	10.4228	-8.06656	8.30163e-12	7.16759e-11	16.3499
FOSB	-3.23934	9.00702	-7.78211	2.90277e-11	2.27919e-10	15.1105
FOSL1	2.16359	5.49168	8.67679	5.63029e-13	5.91193e-12	19.017
FOXD1	3.14709	4.90963	13.2191	2.2454e-21	1.62578e-19	38.2284
FOXE1	-2.42551	6.80384	-13.7778	2.41778e-22	2.26716e-20	40.4412
FOXM1	2.76749	4.96889	12.4854	4.44181e-20	2.16692e-18	35.2635
FOXO1	-1.21555	6.56034	-12.037	2.84157e-19	1.13862e-17	33.4195
FOXO6	-1.26383	8.50653	-8.88538	2.24479e-13	2.53133e-12	19.9292
FOXQ1	-1.36274	8.09086	-4.17178	7.96256e-05	0.000225978	0.590719
FPR1	1.15295	5.00581	9.74509	5.14612e-15	7.9826e-14	23.6773
FPR3	1.87501	5.70253	7.72334	3.75799e-11	2.90679e-10	14.8549
FREM2	-3.64794	7.25554	-12.0589	2.59429e-19	1.05419e-17	33.5099
FRMD3	-1.09472	7.17941	-4.19253	7.39378e-05	0.000210935	0.661785
FRMD5	1.49085	4.72991	9.50111	1.49758e-14	2.11772e-13	22.6165
FRMD6	1.81979	8.7602	10.838	4.52042e-17	1.06079e-15	28.3815
FSCN1	1.21106	6.60397	8.96511	1.57986e-13	1.83674e-12	20.2778
FST	1.48713	5.4461	6.53244	6.62297e-09	3.54216e-08	9.74849
FXYD5	1.95919	7.88194	8.7619	3.86853e-13	4.18101e-12	19.3893
FXYD6	-1.83049	8.88449	-10.2641	5.36957e-16	1.01894e-14	25.9224
FZD1	-1.2483	7.80507	-7.15817	4.45148e-10	2.88428e-09	12.4111
FZD3	-1.94097	7.28212	-10.4622	2.27819e-16	4.67488e-15	26.7743
FZD5	-1.63494	7.23136	-15.4274	4.22476e-25	9.96521e-23	46.7393
G0S2	1.40723	7.58294	4.57172	1.84605e-05	5.84037e-05	1.99752
GABARAPL1	-1.22977	8.62698	-10.4779	2.12893e-16	4.3962e-15	26.8416
GABRB3	-1.27475	5.49863	-7.2905	2.5009e-10	1.68197e-09	12.9807
GAL3ST3	-1.00005	7.11439	-10.8791	3.79055e-17	9.14849e-16	28.5565
GALNT11	-1.01082	9.75392	-10.1265	9.75953e-16	1.74452e-14	25.3288
GALNT12	-2.0681	7.72997	-10.0528	1.34449e-15	2.33398e-14	25.0105
GALNT18	-1.30503	6.0811	-15.0927	1.4894e-24	2.96325e-22	45.4905
GALNT6	1.53118	5.56713	8.98124	1.47154e-13	1.72131e-12	20.3482
GAPDHP73	1.05977	6.75564	9.32076	3.3047e-14	4.37566e-13	21.8306
GARS	1.0901	9.98687	12.496	4.25371e-20	2.08405e-18	35.3065
GAS2L3	2.24783	5.32993	16.162	2.79358e-26	9.26334e-24	49.4297
GCAT	-1.17766	8.18533	-9.81929	3.72137e-15	5.94587e-14	23.9992
GCSH	-1.73333	10.4561	-14.0511	8.24404e-23	9.23672e-21	41.5092
GDF10	-2.08949	5.53305	-11.3783	4.51959e-18	1.32915e-16	30.67
GFPT2	1.46624	6.74129	8.61692	7.33167e-13	7.56989e-12	18.7552
GFRA2	-1.63387	6.93326	-14.4404	1.80981e-23	2.55608e-21	43.0137
GGH	2.71288	7.15547	11.4294	3.63962e-18	1.08998e-16	30.8852
GHR	-1.99869	6.87504	-8.6672	5.87368e-13	6.14774e-12	18.9751
GINS1	2.95826	6.12514	12.0595	2.58742e-19	1.05338e-17	33.5126
GJB2	2.38931	6.05682	6.83987	1.76856e-09	1.03517e-08	11.0496
GJB6	-2.8125	6.84688	-7.49884	1.00594e-10	7.19473e-10	13.8809
GJC1	1.33997	5.0774	10.3515	3.67809e-16	7.22358e-15	26.2983
GKAP1	-1.65085	6.66206	-14.6272	8.80168e-24	1.39849e-21	43.7288
GLB1L2	-1.13079	7.5902	-7.19437	3.80252e-10	2.4879e-09	12.5667
GLCCI1	-1.49538	7.5061	-13.8506	1.8136e-22	1.75827e-20	40.7267
GLDC	-1.5283	6.97724	-4.76062	9.04631e-06	3.00449e-05	2.68745
GLIPR1	1.9362	6.86431	7.7801	2.92856e-11	2.29628e-10	15.1017
GLIS3	-1.9975	8.2792	-11.0959	1.50035e-17	3.91871e-16	29.4776
GLRX	1.22121	8.46655	6.7264	2.88362e-09	1.63108e-08	10.5676
GLT8D2	-1.21708	9.15995	-5.9899	6.55437e-08	3.01193e-07	7.49524
GLTSCR1L	-1.08507	8.08155	-11.6835	1.24683e-18	4.17162e-17	31.9499
GNA14	-2.24151	6.69752	-15.6324	1.96596e-25	5.23038e-23	47.4973
GNA15	2.13254	5.77975	11.3765	4.5545e-18	1.3377e-16	30.6624
GNAL	-1.48762	6.11684	-9.37407	2.6149e-14	3.53808e-13	22.0631
GNB4	1.42596	7.12378	11.9173	4.68116e-19	1.77326e-17	32.9234
GOLGA8CP	-1.1973	8.71857	-8.19106	4.796e-12	4.32699e-11	16.8934
GOLGA8N	-1.99643	11.0416	-10.5704	1.4281e-16	3.07384e-15	27.2384
GPC6	1.22297	6.61542	5.9829	6.74845e-08	3.09304e-07	7.46661
GPD1L	-1.97432	9.80727	-11.6838	1.24533e-18	4.17162e-17	31.9511
GPER1	-1.17828	6.06665	-10.0285	1.49486e-15	2.57354e-14	24.9052
GPM6A	-3.04959	6.92966	-19.5783	2.17859e-31	4.98462e-28	61.0425
GPNMB	1.87197	7.45485	7.96806	1.28106e-11	1.06739e-10	15.9202
GPR110	-1.64462	5.45414	-9.93223	2.27343e-15	3.78024e-14	24.4887
GPR133	-2.85748	6.92717	-14.3679	2.39705e-23	3.22614e-21	42.7349
GPR176	1.18516	6.07388	10.4901	2.0199e-16	4.21287e-15	26.8939
GPR27	-1.23234	7.24014	-9.39128	2.42456e-14	3.30399e-13	22.1381
GPR34	1.8449	6.59716	6.06315	4.82565e-08	2.25928e-07	7.79576
GPR37	1.14257	3.18927	5.76099	1.69323e-07	7.31241e-07	6.56479
GPR56	-1.57569	8.60683	-9.24871	4.53549e-14	5.85951e-13	21.5164
GPR65	1.55694	6.0781	5.08086	2.61977e-06	9.39946e-06	3.89052
GPR83	-2.78016	6.76713	-11.8798	5.47447e-19	2.03668e-17	32.7678
GPR84	2.06836	4.63268	11.9307	4.42542e-19	1.68756e-17	32.9793
GPR87	1.24893	3.23801	5.52931	4.36789e-07	1.77856e-06	5.63754
GPRASP1	-3.28046	8.66364	-14.8312	4.02777e-24	7.19964e-22	44.5041
GPRC5A	-1.89815	7.9384	-10.0808	1.19045e-15	2.08398e-14	25.1314
GPRC5C	-1.13204	7.16548	-10.3678	3.42745e-16	6.77788e-15	26.3685
GPSM2	1.58548	5.66652	11.4	4.12284e-18	1.22348e-16	30.7613
GPX3	-3.17975	12.6484	-12.51	4.01541e-20	1.98429e-18	35.3638
GRAMD1C	-1.28533	6.9897	-6.38675	1.23209e-08	6.31359e-08	9.13753
GRAMD2	-1.46657	6.93929	-9.60192	9.62809e-15	1.40492e-13	23.0551
GRAMD3	-1.13626	7.71463	-5.39956	7.37953e-07	2.89264e-06	5.12525
GRB14	-1.81724	6.08078	-7.17825	4.07889e-10	2.65808e-09	12.4974
GREM1	3.27667	5.04657	10.351	3.68474e-16	7.23043e-15	26.2966
GRHL2	-1.27279	7.62063	-8.41518	1.78511e-12	1.72992e-11	17.8729
GS1-259H13.2	-1.01402	6.07802	-7.47468	1.11822e-10	7.93577e-10	13.7763
GSTM3	-2.27367	8.67359	-11.5575	2.11968e-18	6.73588e-17	31.4225
GSTM4	-1.08807	6.76408	-8.04945	8.95153e-12	7.6681e-11	16.2752
GSTO2	-1.43183	7.07758	-9.85896	3.12963e-15	5.05351e-14	24.1712
GTSE1	1.38316	5.22317	11.6808	1.26124e-18	4.20658e-17	31.9385
GUCY1B3	1.12976	6.66758	7.14722	4.66873e-10	3.01668e-09	12.3641
GZMB	1.50654	5.5581	4.32874	4.52369e-05	0.00013407	1.13365
HAPLN1	1.28137	4.05602	6.34372	1.47899e-08	7.49653e-08	8.95786
HAS2	2.56803	4.82954	8.52757	1.08733e-12	1.08828e-11	18.3644
HAS3	-1.2532	5.80735	-8.505	1.20118e-12	1.19595e-11	18.2656
HAVCR2	1.08073	5.12682	8.86613	2.44357e-13	2.73795e-12	19.845
HBA1	-1.56961	10.6644	-4.7081	1.10458e-05	3.61971e-05	2.49409
HBB	-1.08651	9.74569	-4.38106	3.73754e-05	0.000112195	1.31733
HCAR3	1.88995	4.77039	7.14391	4.73632e-10	3.0569e-09	12.3499
HCG11	-1.68656	4.8749	-10.0919	1.13417e-15	1.99768e-14	25.1795
HCG4	-1.45879	5.65963	-7.89799	1.74385e-11	1.41788e-10	15.6149
HCK	1.98465	6.32466	7.64143	5.38425e-11	4.04305e-10	14.4991
HCLS1	1.46812	7.5101	4.20137	7.16358e-05	0.000204955	0.692124
HDHD2	-1.27767	10.0999	-11.7887	8.01833e-19	2.83116e-17	32.3886
HDHD3	-1.44489	7.08981	-10.3987	2.99763e-16	5.99002e-15	26.5016
HEATR3	1.55323	5.22107	13.4086	1.04966e-21	8.42678e-20	38.9836
HEBP1	-1.26338	10.9813	-11.6768	1.28256e-18	4.27148e-17	31.9218
HEIH	-1.36959	9.56573	-14.2503	3.78588e-23	4.73148e-21	42.2814
HELLS	1.33916	4.57591	10.4938	1.98748e-16	4.15662e-15	26.91
HEY1	1.41294	8.02851	9.45509	1.83248e-14	2.54258e-13	22.4161
HGD	-2.58931	7.16241	-15.0456	1.78052e-24	3.51192e-22	45.3135
HGF	1.01681	4.41108	5.96378	7.30835e-08	3.32965e-07	7.38841
HHAT	-1.35416	6.3788	-9.78804	4.26562e-15	6.72621e-14	23.8637
HHATL	-2.47256	7.49123	-7.26674	2.77397e-10	1.85093e-09	12.8783
HHEX	-3.33242	9.7488	-15.8585	8.51048e-26	2.434e-23	48.3266
HIBCH	-1.03392	8.92295	-8.26544	3.45518e-12	3.20188e-11	17.2183
HILPDA	1.21995	7.33219	6.34935	1.44409e-08	7.33261e-08	8.98135
HIRA	-1.10329	6.31665	-11.8767	5.54595e-19	2.04994e-17	32.755
HIST2H2BE	-1.18894	7.7508	-7.59589	6.57493e-11	4.85272e-10	14.3015
HJURP	2.14915	5.4843	13.197	2.45453e-21	1.71218e-19	38.14
HK3	1.08119	5.97268	9.7159	5.84685e-15	8.95421e-14	23.5505
HLF	-3.55798	7.26236	-17.9632	4.75968e-29	5.44507e-26	55.7323
HLX	1.10408	6.87521	8.51726	1.13793e-12	1.13644e-11	18.3193
HMGA1	1.00032	6.72746	6.83197	1.82989e-09	1.06779e-08	11.016
HMGCR	-1.12507	8.9183	-7.3779	1.7075e-10	1.17461e-09	13.3578
HMMR	2.76306	5.73009	9.26155	4.28665e-14	5.56632e-13	21.5724
HMOX1	1.79954	6.81039	8.44886	1.53869e-12	1.5116e-11	18.0201
HN1	1.77477	7.76165	12.0863	2.31448e-19	9.50722e-18	33.6234
HOMER1	-1.53727	8.64257	-9.62374	8.75066e-15	1.28922e-13	23.15
HOOK1	-2.6186	7.21329	-11.0032	2.22853e-17	5.60933e-16	29.0844
HOOK2	-1.31969	7.53438	-9.49922	1.50999e-14	2.13263e-13	22.6083
HOPX	-1.15573	6.74644	-9.16733	6.4869e-14	8.11483e-13	21.1611
HOTAIRM1	1.07488	4.39026	12.0852	2.32491e-19	9.53295e-18	33.6189
HOXA1	1.1177	4.06095	8.30274	2.93108e-12	2.73839e-11	17.3814
HOXA10	1.25262	4.87198	9.25112	4.48776e-14	5.80441e-13	21.5269
HOXB2	1.0364	7.11604	7.48003	1.0923e-10	7.7687e-10	13.7995
HOXB7	1.67908	4.70092	10.5772	1.38708e-16	2.994e-15	27.2673
HOXC6	2.47756	5.80239	11.7583	9.10704e-19	3.13809e-17	32.2621
HPGDS	1.60862	4.92661	9.59037	1.01275e-14	1.47029e-13	23.0049
HPSE	2.04915	5.09993	10.411	2.8425e-16	5.69995e-15	26.5544
HRASLS	-1.3005	6.00629	-5.89928	9.5571e-08	4.27417e-07	7.1253
HRH1	2.07804	5.44792	14.8689	3.48828e-24	6.48876e-22	44.6467
HS3ST3A1	3.11445	4.34062	9.6491	7.83135e-15	1.16503e-13	23.2603
HSD11B1	1.28152	5.82114	5.04345	3.03348e-06	1.08076e-05	3.74792
HSD11B2	-1.32254	5.47191	-7.17714	4.0988e-10	2.67029e-09	12.4926
HSD17B14	-1.02725	6.78853	-7.57935	7.06939e-11	5.19254e-10	14.2298
HSD17B6	-4.07272	8.72508	-13.3294	1.44177e-21	1.10239e-19	38.6684
HSD17B8	-2.13715	8.91158	-17.386	3.5151e-28	2.36546e-25	53.7575
HSP90B1	-1.0807	10.9163	-11.6907	1.20949e-18	4.07557e-17	31.9801
HSPA5	-1.53819	11.1527	-13.9882	1.05524e-22	1.11262e-20	41.2642
HSPA6	1.86257	6.13084	7.42179	1.40936e-10	9.80422e-10	13.5475
HSPB8	-1.08512	6.94355	-7.07612	6.35926e-10	4.01379e-09	12.0589
HTRA1	1.09721	9.09335	7.60086	6.43319e-11	4.75578e-10	14.323
IBSP	2.30582	4.37951	6.7506	2.59851e-09	1.47675e-08	10.6703
ICAM1	1.55596	6.25576	8.18601	4.90395e-12	4.41047e-11	16.8714
ID1	-2.62927	11.256	-13.2296	2.15263e-21	1.57355e-19	38.2703
ID2	-1.03356	8.94176	-7.22692	3.29991e-10	2.17711e-09	12.7068
ID3	-1.8424	10.7626	-10.3059	4.47975e-16	8.59151e-15	26.1024
ID4	-3.68325	9.01377	-16.4967	8.29064e-27	3.38732e-24	50.632
IER2	-1.17671	11.5239	-6.22164	2.47877e-08	1.21312e-07	8.45014
IER5	1.30757	8.85342	9.35281	2.87079e-14	3.85015e-13	21.9704
IFI16	1.46865	8.64377	6.8767	1.50857e-09	8.93734e-09	11.2065
IFI27	1.44294	8.30598	5.71594	2.03805e-07	8.71602e-07	6.38327
IFI30	1.71783	10.1292	7.52069	9.1415e-11	6.59822e-10	13.9755
IFI44	1.18825	6.50595	5.9457	7.87998e-08	3.56947e-07	7.31454
IFIT3	1.12388	7.70321	5.25201	1.3319e-06	5.02787e-06	4.54925
IFITM1	1.07738	10.0917	4.99199	3.70843e-06	1.30017e-05	3.55264
IFT57	-1.40117	7.84683	-13.2373	2.08643e-21	1.53005e-19	38.3014
IFT74	-1.29348	5.86518	-10.3126	4.35242e-16	8.38244e-15	26.1311
IFT88	-1.41995	8.88294	-12.8006	1.2225e-20	7.04552e-19	36.5453
IGF2BP2	1.09255	6.17062	12.2451	1.19765e-19	5.32084e-18	34.278
IGF2BP3	1.65688	4.58868	11.3261	5.6385e-18	1.60061e-16	30.4502
IGFBP3	1.58439	8.41218	7.46479	1.16767e-10	8.26619e-10	13.7335
IGFBPL1	-3.37534	8.02211	-14.2897	3.24776e-23	4.17465e-21	42.4336
IGIP	-1.57219	8.43229	-11.7541	9.26883e-19	3.18425e-17	32.2446
IGSF10	-1.16859	5.95663	-7.77955	2.9356e-11	2.30101e-10	15.0993
IGSF21	1.10154	4.51522	8.44526	1.56333e-12	1.53317e-11	18.0044
IGSF6	1.61631	4.50948	7.34292	1.98936e-10	1.35385e-09	13.2068
IL10RA	1.18287	7.25121	4.4819	2.57859e-05	7.96304e-05	1.67498
IL15RA	1.07739	6.86703	6.9784	9.71601e-10	5.94074e-09	11.6406
IL17D	-1.21585	6.01179	-7.77904	2.94222e-11	2.30541e-10	15.0971
IL18	1.19984	5.28498	4.65197	1.36579e-05	4.40876e-05	2.28872
IL18R1	1.10375	4.89523	5.8074	1.39819e-07	6.11208e-07	6.75235
IL1R2	1.80114	5.22163	8.41599	1.77878e-12	1.72525e-11	17.8764
IL1RAP	1.34102	5.61621	12.0887	2.29181e-19	9.46508e-18	33.6331
IL2RA	1.59839	5.11693	9.52701	1.3368e-14	1.9033e-13	22.7292
IL32	1.06755	7.18566	3.76082	0.00033118	0.000839693	-0.769341
IL33	-1.3883	6.41936	-5.13806	2.09184e-06	7.65169e-06	4.10951
IL4R	1.09205	7.81138	6.79133	2.18038e-09	1.25597e-08	10.8432
IL7R	1.50362	7.15777	3.93006	0.000185999	0.000493925	-0.220477
ILDR1	-1.35116	6.13869	-12.2893	9.97413e-20	4.54598e-18	34.4598
ILF3-AS1	-1.48998	7.92734	-8.77655	3.62667e-13	3.94008e-12	19.4533
IMPA2	-2.01722	8.42796	-9.06367	1.02361e-13	1.23719e-12	20.7084
INHBA	2.0091	5.93378	11.0655	1.70815e-17	4.38144e-16	29.3487
INMT	-1.56527	7.14751	-12.5172	3.89827e-20	1.94743e-18	35.3932
INPP5J	-2.15761	8.48672	-13.3687	1.23137e-21	9.64856e-20	38.825
INSC	1.20684	3.91422	5.10795	2.35523e-06	8.52789e-06	3.99409
IP6K3	-2.51384	6.40931	-12.622	2.53559e-20	1.3306e-18	35.8205
IPCEF1	-4.22781	9.22016	-21.228	1.2001e-33	9.15272e-30	66.1536
IPW	-1.3054	5.76915	-11.8777	5.52463e-19	2.04868e-17	32.7588
IQCA1	-1.08704	4.98283	-12.8085	1.1837e-20	6.87384e-19	36.5773
IQCH-AS1	-1.01026	6.4219	-10.2326	6.15633e-16	1.14891e-14	25.7866
IQCJ-SCHIP1	2.54749	6.31006	14.6813	7.1514e-24	1.16874e-21	43.9347
IRAK1BP1	-1.51127	5.98705	-10.3767	3.29725e-16	6.54303e-15	26.407
IRF6	-1.44616	6.57619	-8.44362	1.57467e-12	1.54352e-11	17.9972
IRS1	-1.56897	8.20433	-10.2051	6.93784e-16	1.27603e-14	25.6678
IRX3	1.5159	7.62352	6.00371	6.18729e-08	2.85298e-07	7.5518
ISG15	1.56275	8.46833	6.94963	1.10051e-09	6.66126e-09	11.5176
ISLR	-1.0554	8.16603	-6.23953	2.29853e-08	1.12879e-07	8.52434
ISM1	-1.65353	6.78158	-9.1707	6.39129e-14	8.00398e-13	21.1759
ITGA10	1.08415	6.10488	5.6401	2.78109e-07	1.16541e-06	6.07903
ITGA2	1.93733	6.48224	13.1931	2.49293e-21	1.73369e-19	38.1246
ITGA4	1.64373	4.86572	5.49723	4.97472e-07	2.00815e-06	5.5104
ITGA5	2.0022	7.58538	14.5419	1.22292e-23	1.79361e-21	43.4026
ITGA9	-1.09585	6.12663	-10.5072	1.87586e-16	3.93758e-15	26.9674
ITGAM	1.95593	6.67637	8.01579	1.03822e-11	8.79146e-11	16.1284
ITGB2	1.35211	7.00602	5.37096	8.27856e-07	3.22296e-06	5.01304
ITGB5	1.11277	7.0245	11.5657	2.0471e-18	6.53244e-17	31.4571
ITGBL1	1.17726	5.73092	5.77606	1.59125e-07	6.89411e-07	6.62564
ITIH5	-1.85584	7.08233	-16.4221	1.08562e-26	4.13983e-24	50.3652
ITM2A	-2.0479	9.83495	-13.1459	3.01494e-21	2.05916e-19	37.9358
ITPR1	-1.60195	7.87742	-12.7646	1.41571e-20	7.95859e-19	36.3995
IVD	-1.19515	7.35711	-11.8183	7.08252e-19	2.52123e-17	32.5119
IYD	-4.85537	9.63041	-12.7013	1.8336e-20	9.94144e-19	36.1426
JADE1	-1.53641	8.38418	-13.5799	5.2994e-22	4.54121e-20	39.6622
JMY	-1.0939	7.58818	-8.81177	3.10505e-13	3.41556e-12	19.6074
JUN	-1.51587	9.63929	-8.24825	3.7273e-12	3.43458e-11	17.1432
KANSL1L	-1.06336	6.38661	-9.05385	1.06883e-13	1.28372e-12	20.6655
KB-431C1.4	-1.78785	6.69118	-11.345	5.20429e-18	1.49779e-16	30.5298
KBTBD11	-1.44667	6.58655	-7.62961	5.67089e-11	4.23881e-10	14.4478
KBTBD7	-1.83675	6.90451	-12.4445	5.25699e-20	2.52689e-18	35.0961
KCNAB1	-1.85001	6.7741	-12.7307	1.62607e-20	8.94133e-19	36.2619
KCNIP4	-1.6998	6.76529	-11.6667	1.33802e-18	4.44324e-17	31.8797
KCNJ13	-1.89205	5.19215	-9.04941	1.08991e-13	1.30629e-12	20.6461
KCNJ15	-2.25717	8.4141	-9.24878	4.53407e-14	5.85951e-13	21.5167
KCNJ16	-4.13926	8.82843	-14.3525	2.54392e-23	3.384e-21	42.6759
KCNJ2	2.10769	6.44	8.05871	8.59397e-12	7.39767e-11	16.3156
KCNK2	-1.06283	5.29526	-6.08637	4.37825e-08	2.06503e-07	7.89129
KCNK6	1.00514	4.17904	8.32134	2.70029e-12	2.53936e-11	17.4626
KCNN4	1.80481	5.84635	9.79321	4.17033e-15	6.60088e-14	23.8861
KCNQ1	-1.45124	8.52307	-13.2248	2.19439e-21	1.59897e-19	38.2513
KCNS3	1.23347	6.7093	6.4321	1.016e-08	5.276e-08	9.32727
KCTD14	-1.12436	7.55648	-6.37425	1.29927e-08	6.63706e-08	9.08529
KDELC1	1.65307	6.65266	12.9417	6.88784e-21	4.25929e-19	37.1152
KDELC2	1.01278	7.57332	9.06143	1.03377e-13	1.24816e-12	20.6986
KDELR3	1.82325	6.72151	11.339	5.3387e-18	1.53262e-16	30.5045
KDF1	-1.68871	6.48625	-12.0003	3.31042e-19	1.29646e-17	33.2677
KDM1B	-1.09706	5.58274	-9.54755	1.22174e-14	1.74928e-13	22.8186
KGFLP2	-1.64765	6.54483	-11.751	9.39293e-19	3.22204e-17	32.2314
KHDRBS2	-1.67951	5.40078	-12.1805	1.56499e-19	6.79451e-18	34.0122
KIAA0101	2.39863	6.96761	11.4803	2.93574e-18	9.00399e-17	31.0988
KIAA0232	-1.18112	8.10726	-10.8235	4.81045e-17	1.11966e-15	28.3197
KIAA1324	-1.55551	6.17404	-9.05491	1.06383e-13	1.27839e-12	20.6702
KIAA1407	-1.17484	7.0526	-10.5692	1.43564e-16	3.08717e-15	27.2332
KIAA1456	-1.35076	5.31384	-14.0397	8.62069e-23	9.48275e-21	41.4649
KIAA1524	1.29086	3.80169	9.82779	3.58571e-15	5.75322e-14	24.0361
KIAA1549L	1.31227	4.31887	11.142	1.2328e-17	3.28745e-16	29.6728
KIF11	2.47486	5.32363	8.72426	4.56687e-13	4.8736e-12	19.2247
KIF14	3.12755	4.42046	14.9463	2.59706e-24	4.95173e-22	44.9392
KIF15	3.24749	4.57307	13.647	4.05917e-22	3.57207e-20	39.9269
KIF18A	1.24702	5.60142	7.32935	2.11082e-10	1.43013e-09	13.1483
KIF18B	2.60639	5.65114	13.0987	3.64753e-21	2.43311e-19	37.7466
KIF20A	3.49675	5.20241	13.5474	6.0331e-22	5.15064e-20	39.5334
KIF23	2.45068	3.75346	14.7236	6.0786e-24	1.02264e-21	44.0959
KIF2C	2.34552	5.99788	11.8283	6.79077e-19	2.43829e-17	32.5537
KIF4A	3.06996	5.49249	13.5245	6.60772e-22	5.57877e-20	39.4431
KISS1R	1.30933	4.38304	5.84227	1.2105e-07	5.34159e-07	6.89362
KIT	-3.45803	9.22987	-15.0296	1.8921e-24	3.7001e-22	45.2532
KLF3-AS1	-1.03652	5.68069	-7.15103	4.59193e-10	2.97041e-09	12.3804
KLF4	-1.37459	8.13538	-6.44993	9.41718e-09	4.91481e-08	9.40199
KLF5	-1.83148	7.74209	-8.27814	3.267e-12	3.03611e-11	17.2738
KLHDC1	-1.02873	5.13694	-12.9726	6.0774e-21	3.83905e-19	37.2395
KLHDC8B	-1.70327	9.1175	-15.1637	1.13904e-24	2.39094e-22	45.7563
KLHDC9	-2.1791	8.67142	-13.0721	4.06127e-21	2.67786e-19	37.6399
KLHL14	-1.4055	5.87511	-14.4843	1.52737e-23	2.21179e-21	43.182
KLHL15	-1.01197	8.22641	-7.46406	1.17141e-10	8.28753e-10	13.7303
KLRC1	1.88564	5.16801	4.85572	6.28484e-06	2.12938e-05	3.04049
KLRG2	-1.22645	6.85704	-10.2497	5.71605e-16	1.07729e-14	25.8603
KMO	1.25046	4.43925	5.75921	1.7057e-07	7.36207e-07	6.55761
KNTC1	1.69395	5.38486	10.7673	6.12272e-17	1.40509e-15	28.08
KPNA2	2.04426	9.22649	12.8504	9.98148e-21	5.93185e-19	36.7467
KPNA5	-1.49105	7.30323	-13.8363	1.91854e-22	1.84438e-20	40.6708
KRT8	-1.20268	9.83641	-5.20402	1.6116e-06	6.00349e-06	4.3635
KRTCAP3	-1.47478	7.02148	-9.80855	3.90006e-15	6.21835e-14	23.9526
KYNU	1.05262	5.05291	5.86989	1.07962e-07	4.78992e-07	7.00578
LAIR1	1.3576	6.16089	7.85512	2.10572e-11	1.69049e-10	15.4282
LAMB3	2.21043	6.30355	9.8001	4.04669e-15	6.43421e-14	23.916
LAMTOR3	-1.18714	9.39577	-11.0755	1.63659e-17	4.22156e-16	29.3912
LAPTM5	1.78479	9.25435	5.70113	2.16579e-07	9.2158e-07	6.32376
LCP2	1.28374	4.94548	7.13803	4.85912e-10	3.12821e-09	12.3246
LDLRAD3	1.95773	6.73818	13.6402	4.17095e-22	3.65637e-20	39.8999
LDOC1	-1.09253	9.50616	-6.40554	1.13749e-08	5.86036e-08	9.21612
LECT1	-1.09556	6.85803	-5.41483	6.93953e-07	2.73093e-06	5.18527
LEPRE1	1.81242	7.52846	14.5866	1.02904e-23	1.58017e-21	43.5738
LGALS1	2.93213	10.7017	15.9789	5.46246e-26	1.66642e-23	48.7658
LGR6	-1.23446	6.47374	-9.90105	2.60459e-15	4.27252e-14	24.3537
LHFPL2	1.15569	8.44954	10.4327	2.58782e-16	5.23051e-15	26.6477
LHPP	-1.11517	6.91487	-10.1325	9.50845e-16	1.7063e-14	25.3547
LIFR	-1.76996	6.90568	-13.7787	2.40897e-22	2.26716e-20	40.4449
LILRB2	1.81671	4.91124	9.44196	1.94112e-14	2.68194e-13	22.3589
LIMCH1	-1.82213	7.76197	-9.67123	7.10848e-15	1.06861e-13	23.3564
LIMK2	-1.21005	7.51431	-10.5266	1.72547e-16	3.65884e-15	27.0504
LIMS3	1.0048	5.43758	4.69191	1.17449e-05	3.83615e-05	2.4347
LINC00086	-1.8746	6.92405	-9.31812	3.34325e-14	4.42159e-13	21.8191
LINC00152	1.16805	6.9777	10.5247	1.73988e-16	3.68256e-15	27.0422
LINC00271	-1.74633	5.65056	-14.372	2.3592e-23	3.194e-21	42.7507
LINC00310	-1.64484	5.17656	-10.2918	4.76175e-16	9.08991e-15	26.0418
LINC00472	-1.22556	5.31563	-7.10568	5.5927e-10	3.57433e-09	12.1857
LINC00511	1.29111	4.96837	14.2698	3.50851e-23	4.45971e-21	42.3569
LINC00597	1.37322	4.29341	8.69931	5.09801e-13	5.40011e-12	19.1155
LINC00839	1.44021	5.0094	9.48078	1.6372e-14	2.29388e-13	22.528
LINC00865	-1.78951	8.04943	-12.1618	1.69113e-19	7.24588e-18	33.9352
LINC00886	-1.29689	6.47067	-13.968	1.1421e-22	1.19321e-20	41.1857
LINC00938	-1.45033	6.5072	-14.558	1.14907e-23	1.69741e-21	43.4644
LINC00959	-1.84237	6.7138	-12.8318	1.07678e-20	6.31711e-19	36.6714
LINC00973	2.53136	3.44679	7.26592	2.784e-10	1.85654e-09	12.8747
LINC00992	-1.72804	6.04012	-11.561	2.08814e-18	6.64486e-17	31.4374
LINC01003	-1.61806	8.46004	-10.455	2.35059e-16	4.79764e-15	26.7432
LINC01023	-1.27262	5.91783	-9.12266	7.8954e-14	9.75414e-13	20.9661
LINC01094	2.09837	4.44482	10.6086	1.21176e-16	2.64299e-15	27.4016
LINC01116	2.38857	5.60011	10.7334	7.08182e-17	1.60269e-15	27.9354
LINC01279	-1.39681	8.44889	-6.45683	9.14428e-09	4.78001e-08	9.43093
LINC01296	1.48518	4.37351	9.73088	5.47616e-15	8.46013e-14	23.6155
LINC01315	-2.40387	9.46962	-12.3231	8.67379e-20	4.00114e-18	34.5986
LINGO2	-1.78232	6.47459	-9.2327	4.86626e-14	6.23404e-13	21.4465
LIPG	-3.98692	10.0404	-13.2131	2.29964e-21	1.65458e-19	38.2047
LIPT1	-1.38699	8.47626	-11.1822	1.03884e-17	2.81285e-16	29.8429
LIX1	-2.11175	5.32638	-8.39046	1.99076e-12	1.91381e-11	17.7648
LL22NC03-N14H11.1	1.98342	6.11946	12.2833	1.02246e-19	4.65089e-18	34.4352
LMNB1	1.79876	5.24868	8.346	2.42206e-12	2.28995e-11	17.5704
LMNB2	1.39124	6.82021	9.67955	6.85434e-15	1.03448e-13	23.3926
LMO3	-1.93588	6.31252	-8.48482	1.31298e-12	1.30273e-11	18.1774
LMOD1	-1.58711	6.65754	-11.4786	2.95692e-18	9.0568e-17	31.0917
LNX1	-1.82935	7.52174	-11.4235	3.73267e-18	1.11493e-16	30.8601
LOC100129129	-1.4986	6.76795	-11.5195	2.48754e-18	7.77845e-17	31.2635
LOC100129406	1.30076	4.10981	8.74582	4.15274e-13	4.46287e-12	19.319
LOC100129518	1.51087	6.84786	9.1273	7.73585e-14	9.56736e-13	20.9864
LOC100131262	1.18135	4.84072	9.42773	2.06616e-14	2.83585e-13	22.2969
LOC100132891	1.56208	5.50174	7.09193	5.93718e-10	3.76818e-09	12.1267
LOC100134317	-1.5203	6.70089	-9.17884	6.16651e-14	7.74367e-13	21.2114
LOC100271840	1.30456	3.25812	6.483	8.17897e-09	4.30988e-08	9.54074
LOC100287896	-1.33895	6.58882	-8.63955	6.63522e-13	6.88811e-12	18.8542
LOC100505592	1.46413	4.26599	7.83431	2.30755e-11	1.83964e-10	15.3376
LOC100505920	-1.91706	6.86676	-6.69252	3.33578e-09	1.86334e-08	10.4241
LOC100506098	-1.62778	6.94776	-9.22742	4.98053e-14	6.36974e-13	21.4234
LOC100506558	-2.09697	7.42523	-13.2033	2.39255e-21	1.67919e-19	38.1654
LOC100506990	-1.40424	8.10218	-7.64316	5.34362e-11	4.01518e-10	14.5066
LOC100507557	-1.87602	6.33409	-10.7587	6.35332e-17	1.45219e-15	28.0433
LOC100507564	-1.11688	5.41462	-9.60568	9.47084e-15	1.38373e-13	23.0715
LOC100996457	-1.27285	5.78094	-11.2171	8.95562e-18	2.45689e-16	29.9904
LOC100996579	-2.90818	6.9856	-12.3492	7.78678e-20	3.64339e-18	34.7058
LOC100996643	1.10504	6.78869	11.7872	8.06975e-19	2.84493e-17	32.3822
LOC100996732	1.26439	7.66531	8.78341	3.51858e-13	3.83358e-12	19.4833
LOC101927365	-1.82752	6.42069	-8.12678	6.36683e-12	5.59205e-11	16.6127
LOC101927482	1.11308	3.07897	4.96028	4.19516e-06	1.46028e-05	3.43283
LOC101928076	-1.04617	5.87196	-6.41357	1.09932e-08	5.67903e-08	9.24971
LOC101928173	1.1143	4.65957	5.1244	2.20756e-06	8.03261e-06	4.0571
LOC101928303	-2.20778	6.66762	-13.7666	2.52721e-22	2.35051e-20	40.3973
LOC101928429	1.06377	3.77418	8.35482	2.32967e-12	2.20807e-11	17.609
LOC101928605	-1.99908	5.80767	-9.93465	2.24965e-15	3.74886e-14	24.4992
LOC101928916	2.80147	8.53348	11.6838	1.2454e-18	4.17162e-17	31.951
LOC101929040	-1.17103	5.66685	-4.15656	8.40622e-05	0.000237479	0.538746
LOC101929122	-2.60945	6.79847	-12.0618	2.5632e-19	1.04538e-17	33.5219
LOC101929340	-2.38759	6.29718	-12.7397	1.56684e-20	8.68022e-19	36.2987
LOC101929480	-2.2262	6.42167	-11.4007	4.10982e-18	1.2212e-16	30.7645
LOC101929842	-1.33305	6.50466	-8.68918	5.3309e-13	5.63116e-12	19.0712
LOC101929880	1.02236	6.93978	7.43271	1.3436e-10	9.40109e-10	13.5948
LOC101930052	-1.05868	6.90287	-6.98581	9.40882e-10	5.76523e-09	11.6723
LOC101930415	-1.91369	8.9757	-9.94232	2.17558e-15	3.62809e-14	24.5324
LOC101930593	1.02349	4.42459	5.66914	2.46942e-07	1.04206e-06	6.19534
LOC102724517	-1.36152	6.76713	-11.8966	5.10312e-19	1.90783e-17	32.8377
LOC102724689	-1.69611	8.45189	-7.41477	1.4533e-10	1.00853e-09	13.5172
LOC102724927	-1.85567	5.2998	-9.66276	7.37697e-15	1.10461e-13	23.3196
LOC102725271	2.74319	5.67703	9.74896	5.05991e-15	7.87021e-14	23.6941
LOC153684	1.11891	5.04593	8.85911	2.52026e-13	2.81835e-12	19.8144
LOC257396	-1.15844	5.35161	-8.39636	1.93965e-12	1.86782e-11	17.7906
LOC283070	-1.51181	8.3597	-9.94447	2.15533e-15	3.60219e-14	24.5417
LOC283278	-1.04805	6.4074	-7.69228	4.30727e-11	3.2916e-10	14.7199
LOC283357	-1.32395	6.95957	-8.86733	2.43059e-13	2.72474e-12	19.8503
LOC283588	-1.05967	4.9398	-7.69456	4.26426e-11	3.26199e-10	14.7299
LOC285043	-1.1098	6.1209	-7.95879	1.3344e-11	1.10821e-10	15.8798
LOC285095	-1.06499	4.5598	-7.68998	4.35084e-11	3.32267e-10	14.71
LOC286161	-1.38167	7.03814	-12.2618	1.11761e-19	5.00408e-18	34.3467
LOC338620	1.41129	3.96601	9.20341	5.53513e-14	7.01627e-13	21.3186
LOC439911	-1.86102	7.13382	-11.7936	7.85379e-19	2.77735e-17	32.4092
LOC440934	-2.15674	6.09468	-9.24317	4.6473e-14	5.98707e-13	21.4922
LOC643072	-1.06552	6.08803	-9.15217	6.93432e-14	8.61799e-13	21.0949
LOC646736	-3.77277	8.18824	-16.0999	3.50512e-26	1.12954e-23	49.2051
LOH12CR2	-1.35108	5.93094	-9.55694	1.17247e-14	1.68405e-13	22.8595
LONRF2	-1.9546	6.54908	-6.67615	3.57868e-09	1.98835e-08	10.3548
LOX	2.26571	5.54553	12.3272	8.52615e-20	3.94098e-18	34.6157
LOXL1	2.54289	6.92803	11.9801	3.60135e-19	1.39659e-17	33.184
LOXL2	1.19257	5.26708	15.5107	3.0936e-25	7.69365e-23	47.0481
LOXL3	1.13281	5.85369	7.83219	2.32916e-11	1.85555e-10	15.3284
LPCAT1	1.42677	7.92698	11.4376	3.51668e-18	1.05731e-16	30.9194
LPCAT2	-2.11966	7.40379	-16.0686	3.9311e-26	1.24922e-23	49.0915
LPHN1	-1.07276	7.23663	-8.97628	1.50403e-13	1.75663e-12	20.3266
LPL	1.31139	6.91812	4.52257	2.21736e-05	6.92099e-05	1.82058
LRIG3	-2.0752	8.17026	-9.66002	7.46586e-15	1.11501e-13	23.3077
LRP1B	-3.85943	6.05471	-17.5114	2.26856e-28	1.7566e-25	54.1902
LRP2	-3.92212	8.96446	-13.8105	2.12471e-22	2.02556e-20	40.5695
LRP2BP	-1.27422	5.46859	-8.99803	1.36662e-13	1.60762e-12	20.4216
LRP8	-1.95135	7.97921	-9.18565	5.98457e-14	7.54419e-13	21.2411
LRRC2	-2.79093	7.57354	-12.8438	1.02536e-20	6.0621e-19	36.72
LRRN3	-2.61705	8.53646	-9.39272	2.40936e-14	3.28718e-13	22.1443
LRRN4CL	-1.06428	5.85403	-6.38916	1.21954e-08	6.25632e-08	9.14759
LSR	-1.28181	7.50077	-5.26794	1.25004e-06	4.73995e-06	4.61109
LST1	1.16479	6.60046	5.5625	3.81664e-07	1.56721e-06	5.76943
LTBP1	2.30208	7.38559	13.4243	9.85823e-22	7.97018e-20	39.0459
LTF	-2.1137	7.64732	-5.49671	4.98524e-07	2.01097e-06	5.50834
LUM	1.47269	8.25377	7.03819	7.49737e-10	4.67156e-09	11.8964
LURAP1L	1.12524	5.76847	7.45192	1.23533e-10	8.69404e-10	13.6778
LY6E	1.0533	7.38808	7.14954	4.62169e-10	2.98797e-09	12.3741
LY75	-1.99204	9.24033	-9.46101	1.78545e-14	2.48033e-13	22.4419
LY86	1.45604	7.00868	5.00878	3.47345e-06	1.22416e-05	3.61626
LY96	2.03515	7.46535	7.06782	6.59259e-10	4.14962e-09	12.0234
LYPD1	1.14117	4.56022	6.91525	1.27701e-09	7.66878e-09	11.3709
LYPLAL1	-1.20056	8.50206	-9.18352	6.04091e-14	7.60683e-13	21.2318
LYRM5	-1.34591	10.0138	-9.52735	1.3348e-14	1.90163e-13	22.7307
LYRM7	-1.03878	7.50989	-9.11047	8.33055e-14	1.0264e-12	20.9129
LYRM9	-1.29667	6.46988	-9.99013	1.7665e-15	3.00949e-14	24.7393
LYVE1	-1.94019	7.29102	-7.06871	6.56714e-10	4.13473e-09	12.0272
LYZ	1.9577	7.79547	4.5223	2.21957e-05	6.92632e-05	1.81962
MAD2L1	2.03637	5.58684	9.98284	1.82351e-15	3.0951e-14	24.7078
MAD2L2	1.24362	7.43325	9.06172	1.03242e-13	1.24719e-12	20.6999
MAGEA12	1.69164	3.61333	5.63023	2.89561e-07	1.20853e-06	6.03954
MAGEA3	2.62691	3.80911	6.72224	2.93565e-09	1.65723e-08	10.55
MAGEA6	2.61696	3.68506	6.70047	3.22371e-09	1.80648e-08	10.4578
MAL	-2.45786	8.44855	-14.0527	8.19158e-23	9.23268e-21	41.5155
MAL2	-3.80072	9.93327	-9.28156	3.92576e-14	5.12972e-13	21.6597
MAMDC2	-1.37852	6.93041	-4.90118	5.27453e-06	1.8104e-05	3.21053
MAMLD1	1.15692	5.77015	6.41271	1.10333e-08	5.69589e-08	9.24613
MAN1C1	-2.2129	7.91478	-13.2112	2.3177e-21	1.66235e-19	38.197
MAN2B2	-1.01345	8.65252	-9.92005	2.39747e-15	3.96059e-14	24.436
MANEAL	1.07336	5.59094	6.56032	5.87897e-09	3.16944e-08	9.86583
MANSC1	-1.21219	8.77334	-7.15293	4.55419e-10	2.94766e-09	12.3886
MAOA	-3.55221	9.09985	-13.6184	4.54701e-22	3.97082e-20	39.8142
MAP1B	1.56678	7.38115	10.4858	2.05716e-16	4.26543e-15	26.8757
MAP3K1	-1.26228	7.56242	-11.084	1.57876e-17	4.09548e-16	29.427
MAP4K3	-1.14173	8.61695	-7.22389	3.34366e-10	2.20342e-09	12.6938
MAP4K4	1.89782	6.7443	14.5578	1.1499e-23	1.69741e-21	43.4636
MAP7	-1.83319	7.43977	-12.8563	9.74242e-21	5.82001e-19	36.7708
MARC1	-3.14809	9.07447	-17.4476	2.83395e-28	1.96538e-25	53.9703
MARC2	-2.38463	8.06619	-14.1601	5.38181e-23	6.48084e-21	41.9324
MARCKS	1.1488	8.34743	10.8478	4.33409e-17	1.02442e-15	28.4233
MARCO	1.55011	5.8597	6.28408	1.90402e-08	9.49104e-08	8.70945
MARVELD2	-2.96086	8.12881	-14.7247	6.05469e-24	1.02264e-21	44.0998
MASTL	1.18444	5.95574	7.44863	1.25325e-10	8.80665e-10	13.6636
MATN3	1.26003	2.92298	7.84313	2.21972e-11	1.77724e-10	15.376
MBIP	-1.17259	8.70147	-6.35601	1.40388e-08	7.13797e-08	9.00912
MCAM	1.28911	7.23592	9.94818	2.12079e-15	3.55571e-14	24.5578
MCEMP1	2.03229	5.78471	9.30742	3.50405e-14	4.6209e-13	21.7725
MCM10	1.98724	4.18229	11.7332	1.01179e-18	3.44491e-17	32.1575
MCM2	1.04563	8.12164	7.83301	2.32075e-11	1.84949e-10	15.3319
MCM4	1.17814	5.6333	10.5247	1.73958e-16	3.68256e-15	27.0423
MCM6	1.03571	6.18454	9.72514	5.61527e-15	8.65231e-14	23.5906
MCTP1	1.16181	4.92144	7.51795	9.25204e-11	6.661e-10	13.9637
MDH1B	-2.16444	6.31052	-15.3448	5.75691e-25	1.29135e-22	46.4327
MDM1	-1.09535	6.63979	-10.3669	3.44099e-16	6.79877e-15	26.3646
MED29	-1.04663	8.32241	-8.72613	4.52948e-13	4.84273e-12	19.2328
MEGF10	1.59357	4.27941	6.49473	7.77997e-09	4.11514e-08	9.58997
MEIS3P1	-1.49546	8.71008	-9.35889	2.79513e-14	3.76414e-13	21.9969
MELK	3.93303	6.48128	14.2974	3.15186e-23	4.07427e-21	42.4633
MEPCE	-1.0449	9.31595	-8.72882	4.47597e-13	4.79e-12	19.2446
METTL25	-1.01947	8.24345	-10.6989	8.21385e-17	1.8461e-15	27.788
METTL7A	-1.08797	7.53011	-10.3589	3.56132e-16	7.0123e-15	26.3304
MFAP2	2.41439	7.4553	14.8119	4.33622e-24	7.69091e-22	44.4309
MFAP4	-1.27619	7.00845	-7.18446	3.97019e-10	2.59093e-09	12.5241
MFSD6	-1.74151	7.99104	-10.3289	4.05593e-16	7.85107e-15	26.2012
MGAT4C	-2.5587	5.87186	-14.2676	3.53938e-23	4.47409e-21	42.3483
MGC24103	1.40362	5.05818	5.75418	1.74139e-07	7.51329e-07	6.53732
MGC4294	1.15566	5.02989	8.07731	7.9178e-12	6.86469e-11	16.3968
MGMT	-1.02844	7.63576	-8.06219	8.46307e-12	7.29047e-11	16.3308
MGST1	-1.37996	8.27266	-8.93211	1.82707e-13	2.09071e-12	20.1335
MICAL1	1.39696	6.43666	8.14102	5.97971e-12	5.27229e-11	16.6749
MICAL2	1.40671	6.22593	12.7677	1.39814e-20	7.89865e-19	36.4119
MICB	2.15907	6.13117	7.34416	1.97864e-10	1.34736e-09	13.2122
MICU3	-1.0019	6.84351	-5.408	7.13296e-07	2.80079e-06	5.15843
MIEF2	-1.03804	6.77181	-10.4107	2.84633e-16	5.70262e-15	26.5531
MILR1	1.26799	4.94592	8.00755	1.07659e-11	9.08277e-11	16.0924
MINA	-1.59281	8.33081	-11.9359	4.33204e-19	1.65471e-17	33.0004
MIOX	-1.8194	7.11685	-11.1256	1.32221e-17	3.50142e-16	29.6032
MIR143HG	1.01511	4.90117	7.24081	3.10602e-10	2.05809e-09	12.7666
MIR155	1.72937	4.47471	4.15902	8.33273e-05	0.000235461	0.547162
MIR21	1.01171	9.97017	5.10322	2.39944e-06	8.67696e-06	3.97599
MIR22	-1.41499	9.73675	-7.16813	4.26263e-10	2.76678e-09	12.4539
MIR29B2	-2.5085	7.39098	-10.4801	2.10904e-16	4.35907e-15	26.851
MIR31HG	1.18211	5.92128	5.06033	2.8394e-06	1.01473e-05	3.81221
MIR3658	1.33145	6.16158	13.4328	9.53093e-22	7.7329e-20	39.0794
MIR3682	-1.346	6.62856	-9.88209	2.82918e-15	4.61052e-14	24.2715
MIR4458	-1.1827	6.62017	-8.14065	5.9894e-12	5.27879e-11	16.6733
MIR4680	-2.22609	9.31722	-15.1878	1.03962e-24	2.22304e-22	45.8469
MIR6778	-1.44904	8.56489	-11.8463	6.30004e-19	2.28439e-17	32.6283
MKI67	2.17472	5.21605	11.6835	1.24711e-18	4.17162e-17	31.9497
MKNK1	1.11972	5.9727	12.0562	2.6233e-19	1.06232e-17	33.4989
MLKL	1.43819	6.78938	8.60207	7.82801e-13	8.04243e-12	18.6902
MLLT11	1.9865	7.36931	8.55645	9.57301e-13	9.67022e-12	18.4907
MLLT3	-1.48985	6.68194	-10.2482	5.75336e-16	1.08343e-14	25.8538
MME	3.11804	5.64307	12.4192	5.83515e-20	2.78723e-18	34.9925
MMP1	5.47358	4.73773	17.9273	5.38358e-29	5.69433e-26	55.6107
MMP10	1.4241	3.77051	6.44813	9.48972e-09	4.94702e-08	9.39443
MMP12	3.85613	4.74427	10.0142	1.59057e-15	2.72805e-14	24.8436
MMP13	2.84187	4.44899	8.02887	9.80098e-12	8.34014e-11	16.1854
MMP14	1.03546	6.18063	10.0863	1.16239e-15	2.03954e-14	25.1551
MMP3	1.22176	3.26716	6.22769	2.41627e-08	1.18407e-07	8.47524
MMP7	1.28177	4.92493	4.70796	1.10519e-05	3.62118e-05	2.49356
MMP9	3.45368	7.86728	7.92503	1.54819e-11	1.27236e-10	15.7327
MMRN1	-3.38867	6.79086	-11.497	2.73614e-18	8.43704e-17	31.1688
MND1	2.0719	4.13426	8.72519	4.54833e-13	4.85834e-12	19.2287
MNDA	1.78452	7.06751	5.6463	2.71139e-07	1.13766e-06	6.10386
MOAP1	-1.15583	9.87174	-9.63109	8.47352e-15	1.25242e-13	23.182
MOCOS	1.57523	4.7243	14.0204	9.29973e-23	1.00367e-20	41.3896
MORN2	-1.36362	8.2013	-9.33522	3.10126e-14	4.1326e-13	21.8937
MPEG1	1.26094	7.48395	4.21174	6.90227e-05	0.000197925	0.727773
MPP5	-1.31656	8.53802	-11.1655	1.1156e-17	2.99941e-16	29.7721
MPP7	-1.27171	5.80924	-9.57357	1.0901e-14	1.5726e-13	22.9318
MPPED2	-3.68484	7.33748	-14.5769	1.0684e-23	1.61887e-21	43.5366
MRC1	1.95787	8.90042	8.86933	2.40932e-13	2.70412e-12	19.859
MRC2	1.23201	7.64066	11.8711	5.67834e-19	2.09212e-17	32.7315
MRO	-1.39377	6.0288	-10.4598	2.30246e-16	4.71622e-15	26.7638
MRPS6	-1.28795	11.0261	-9.75231	4.98642e-15	7.77175e-14	23.7086
MRTO4	1.26982	7.11823	10.1938	7.28692e-16	1.3338e-14	25.6191
MS4A14	1.09072	4.49356	11.1007	1.47028e-17	3.84898e-16	29.4977
MS4A4A	2.26126	6.37595	9.33457	3.11019e-14	4.14209e-13	21.8909
MS4A6A	1.59775	6.84895	7.58546	6.88242e-11	5.06497e-10	14.2563
MS4A7	1.62326	6.72569	8.02462	9.98636e-12	8.48766e-11	16.1669
MSR1	1.37713	4.50459	11.3271	5.61468e-18	1.59582e-16	30.4544
MSRB2	-1.10674	8.04589	-10.511	1.84512e-16	3.88376e-15	26.9838
MT1F	-1.91172	11.9517	-10.4873	2.04394e-16	4.24754e-15	26.8821
MT1M	-1.14934	7.42975	-5.01211	3.42865e-06	1.21005e-05	3.62887
MTCH1	-1.37737	12.7236	-13.612	4.66545e-22	4.05877e-20	39.7887
MTCL1	2.20074	4.78782	11.6391	1.50294e-18	4.9336e-17	31.7642
MTERF2	-1.81224	7.74628	-12.9248	7.37702e-21	4.50097e-19	37.047
MTFR2	1.36311	3.81092	11.0298	1.98939e-17	5.06309e-16	29.1972
MTHFD2	2.10545	6.01856	9.85895	3.12973e-15	5.05351e-14	24.1712
MTMR11	1.15505	5.32743	12.0934	2.24726e-19	9.29787e-18	33.6526
MTURN	-1.25723	6.16704	-12.6542	2.22249e-20	1.18533e-18	35.9515
MUC15	-3.5242	9.08214	-10.1995	7.10897e-16	1.30331e-14	25.6436
MUM1L1	-3.81353	8.3186	-14.6288	8.74901e-24	1.39849e-21	43.7347
MVP	1.35644	8.06165	8.60619	7.68713e-13	7.90834e-12	18.7082
MX2	1.44904	6.98543	7.34321	1.98684e-10	1.35254e-09	13.2081
MXRA5	1.4052	9.64395	6.9045	1.33776e-09	8.00625e-09	11.325
MYBL1	1.27122	4.83668	6.35689	1.39861e-08	7.11432e-08	9.01282
MYBL2	1.03642	5.9712	6.13206	3.61432e-08	1.72462e-07	8.07959
MYC	1.23923	8.3631	4.79807	7.84062e-06	2.62463e-05	2.82604
MYH9	1.09409	8.38501	7.89846	1.74021e-11	1.41593e-10	15.6169
MYLIP	-1.37546	8.70624	-10.6468	1.02774e-16	2.26975e-15	27.5653
MYO1B	1.31011	6.52176	10.4582	2.31811e-16	4.74404e-15	26.757
MYO1E	1.22108	6.25558	8.94877	1.69774e-13	1.95971e-12	20.2063
MYO1F	1.4441	6.78217	6.89376	1.40133e-09	8.35178e-09	11.2792
MYO1G	1.07019	5.54805	6.33321	1.54638e-08	7.8087e-08	8.91403
MYO5B	-1.5639	6.38366	-10.092	1.13372e-15	1.99768e-14	25.1799
MYO5C	-2.63629	9.25217	-11.2992	6.31858e-18	1.76519e-16	30.337
MYOC	-1.93553	6.74981	-10.3407	3.85381e-16	7.53232e-15	26.252
NABP1	2.03935	5.63766	10.1403	9.18961e-16	1.65297e-14	25.3886
NAMPT	1.44033	7.70294	9.9341	2.255e-15	3.75505e-14	24.4968
NANOS1	-2.5973	7.03356	-10.8137	5.01626e-17	1.16166e-15	28.2781
NAP1L2	-3.24214	7.54977	-16.6427	4.9017e-27	2.11606e-24	51.152
NAP1L3	-1.99905	7.43656	-7.71114	3.96479e-11	3.05127e-10	14.8019
NAP1L5	-2.44351	8.63487	-11.5522	2.16735e-18	6.87391e-17	31.4004
NBEA	-2.07859	7.52737	-10.6972	8.27231e-17	1.85712e-15	27.781
NCAPG	3.24865	4.88806	11.5153	2.53221e-18	7.83993e-17	31.2458
NCAPG2	1.27348	5.80455	8.65889	6.09283e-13	6.35676e-12	18.9387
NCAPH	1.86776	5.33094	11.0969	1.49383e-17	3.90614e-16	29.4819
NCF2	2.45977	6.04368	8.91609	1.9607e-13	2.22636e-12	20.0635
NCF4	1.41707	5.81974	6.15547	3.27559e-08	1.56987e-07	8.17626
NDC1	1.04809	7.31744	7.09131	5.95322e-10	3.77731e-09	12.1241
NDC80	3.38523	5.47859	10.3182	4.24827e-16	8.20563e-15	26.1551
NDFIP1	-1.05817	9.99515	-10.0069	1.64225e-15	2.81248e-14	24.8118
NDN	-1.49423	8.54405	-7.6946	4.26351e-11	3.26199e-10	14.73
NDNL2	-1.03732	7.50935	-8.38639	2.02682e-12	1.94602e-11	17.747
NDRG2	-1.06404	6.58345	-10.3662	3.4507e-16	6.80621e-15	26.3618
NDUFC1	-1.03996	9.04933	-11.361	4.86231e-18	1.40822e-16	30.5974
NEB	-1.19121	5.10978	-6.68706	3.41493e-09	1.9057e-08	10.401
NEBL	-2.39385	7.23892	-13.8152	2.0857e-22	1.99668e-20	40.5879
NEBL-AS1	-1.74028	5.8097	-13.0112	5.19685e-21	3.32134e-19	37.395
NEDD4L	-1.24016	7.26432	-8.53614	1.04701e-12	1.05069e-11	18.4018
NEIL3	1.7184	3.9663	8.78221	3.53723e-13	3.85023e-12	19.4781
NEK2	2.4311	4.2635	12.2791	1.04041e-19	4.71379e-18	34.4179
NELL2	-2.41413	8.3238	-10.1813	7.69139e-16	1.40446e-14	25.5654
NFE2L3	1.53284	4.60263	6.40873	1.1222e-08	5.7881e-08	9.22944
NFIA	-2.3907	7.85544	-15.7223	1.40808e-25	3.83533e-23	47.8279
NFIC	-1.04711	8.02011	-7.62305	5.83636e-11	4.3568e-10	14.4194
NFKBIE	1.04846	6.97646	6.50604	7.41338e-09	3.93272e-08	9.63749
NICN1	-1.11576	8.04392	-10.8705	3.93204e-17	9.4402e-16	28.5201
NID1	1.27979	6.29877	12.5118	3.98629e-20	1.97416e-18	35.371
NINL	-1.02619	7.59046	-7.34155	2.00134e-10	1.3616e-09	13.2009
NKX2-1	-2.4773	8.16295	-10.5977	1.26961e-16	2.75867e-15	27.3553
NMB	-1.04671	8.66408	-5.81257	1.36864e-07	5.98978e-07	6.77328
NME1	1.32295	9.85012	9.79313	4.17171e-15	6.60088e-14	23.8858
NME5	-2.4266	7.8038	-12.2267	1.29208e-19	5.68742e-18	34.2026
NME7	-1.05828	9.78137	-7.58276	6.96444e-11	5.12203e-10	14.2446
NOD2	1.2684	4.86297	7.7504	3.33678e-11	2.59855e-10	14.9726
NOL4	-1.23293	4.87443	-8.59249	8.16611e-13	8.35625e-12	18.6483
NOSTRIN	-1.01541	5.51412	-5.62923	2.90742e-07	1.2128e-06	6.03556
NOV	-1.09377	7.27236	-5.01707	3.36293e-06	1.18869e-05	3.64769
NOX4	1.60044	3.84415	12.5252	3.77161e-20	1.89658e-18	35.426
NPAS2	1.02161	4.85268	12.2403	1.2215e-19	5.4153e-18	34.2584
NPL	1.2716	5.727	10.1617	8.37424e-16	1.51584e-14	25.4809
NPNT	-2.38152	8.09527	-11.3066	6.12553e-18	1.71755e-16	30.3679
NPR3	-1.35796	6.71252	-6.4182	1.07787e-08	5.57577e-08	9.2691
NPTX2	2.43262	4.2947	11.5335	2.34541e-18	7.38144e-17	31.3219
NPY1R	-2.22031	6.11977	-11.2117	9.16433e-18	2.50514e-16	29.9675
NR1D2	-1.11548	9.25659	-5.87585	1.0533e-07	4.68589e-07	7.02997
NR2F1-AS1	1.03375	4.85811	6.54691	6.22573e-09	3.33985e-08	9.8094
NR3C2	-3.22096	8.68968	-11.7297	1.0271e-18	3.48665e-17	32.1425
NR4A3	-1.25261	5.93978	-4.24663	6.08909e-05	0.000176152	0.848089
NREP	1.13228	6.2035	11.9121	4.78332e-19	1.803e-17	32.902
NRIP3	1.52541	6.02515	8.72847	4.48306e-13	4.79535e-12	19.243
NT5C2	-1.32296	10.5699	-12.6516	2.24654e-20	1.19537e-18	35.9408
NT5C3B	-1.05275	9.86817	-9.04909	1.09146e-13	1.30678e-12	20.6447
NT5DC1	-1.39247	7.17471	-12.3277	8.50911e-20	3.94098e-18	34.6176
NT5E	1.06083	6.98568	5.5077	4.76806e-07	1.9297e-06	5.55186
NTAN1	1.09563	8.08836	11.6089	1.70661e-18	5.53079e-17	31.6379
NTNG1	1.30176	3.99708	6.69392	3.31565e-09	1.85391e-08	10.4301
NTRK2	-2.46583	7.16961	-12.7973	1.23926e-20	7.10633e-19	36.5317
NTS	-1.67503	5.44909	-6.4491	9.45037e-09	4.92875e-08	9.39852
NUDT1	1.39829	6.7375	8.45543	1.49476e-12	1.47174e-11	18.0489
NUDT16P1	-1.63412	6.6255	-11.4541	3.27873e-18	9.94924e-17	30.989
NUDT3	-1.02298	8.06733	-11.3603	4.87759e-18	1.41003e-16	30.5943
NUF2	3.63809	4.54641	12.0418	2.78525e-19	1.11801e-17	33.4394
NUP155	1.10138	7.36493	8.87755	2.3236e-13	2.61248e-12	19.895
NUP62CL	-1.38876	5.13796	-10.5159	1.80704e-16	3.81412e-15	27.0045
NUPR1	-1.63567	10.1373	-9.6973	6.34233e-15	9.64202e-14	23.4697
NUSAP1	3.01419	5.8985	9.61717	9.00612e-15	1.32344e-13	23.1215
OARD1	-1.22901	8.21332	-11.1133	1.39305e-17	3.67623e-16	29.5513
OASL	1.03591	5.77914	6.2023	2.68941e-08	1.30673e-07	8.36999
OCA2	-2.6201	7.1577	-15.3288	6.11446e-25	1.35824e-22	46.373
OCLN	-3.03431	8.10448	-13.0935	3.72512e-21	2.47764e-19	37.7257
ODAM	-1.53956	5.57581	-9.52266	1.36254e-14	1.93753e-13	22.7103
OGDHL	-2.4822	7.90289	-10.8458	4.37111e-17	1.0321e-15	28.4149
OGN	-2.10104	7.06618	-6.76816	2.4093e-09	1.37708e-08	10.7448
OIP5	2.13537	4.75331	9.04319	1.12018e-13	1.33558e-12	20.619
OLFML2A	-1.67037	9.08817	-8.96791	1.5605e-13	1.81702e-12	20.29
OLFML2B	1.79458	7.59142	9.27535	4.03441e-14	5.26267e-13	21.6326
OLFML3	1.14586	7.92864	5.25027	1.34116e-06	5.05781e-06	4.5425
OLR1	1.605	4.37962	5.39071	7.64699e-07	2.99133e-06	5.0905
OMD	-1.40866	6.07842	-5.202	1.62455e-06	6.04779e-06	4.3557
ORC6	2.33837	6.78642	13.344	1.35959e-21	1.04739e-19	38.7267
ORMDL3	-1.00283	7.43301	-9.01791	1.25206e-13	1.48277e-12	20.5085
OSCAR	1.3844	3.87472	10.8922	3.58247e-17	8.71989e-16	28.6126
OSCP1	-1.77372	7.46243	-13.5839	5.21579e-22	4.48637e-20	39.678
OSMR	1.85465	6.30837	13.4872	7.66732e-22	6.3561e-20	39.2954
OTOS	-3.20768	7.72382	-16.8794	2.10231e-27	1.0064e-24	51.9894
OXTR	1.50494	4.17529	7.41873	1.42832e-10	9.93013e-10	13.5343
P2RY13	1.02399	5.07002	3.89865	0.000207245	0.000544537	-0.32356
P2RY14	-1.27611	6.86092	-5.51851	4.56358e-07	1.85264e-06	5.5947
P2RY2	-1.04122	6.14709	-7.63451	5.55021e-11	4.15948e-10	14.4691
P2RY6	1.15135	5.6919	8.95255	1.66976e-13	1.93341e-12	20.2228
P4HTM	-1.1667	8.8576	-9.41413	2.19321e-14	3.00483e-13	22.2377
PAIP2B	-1.75452	6.80726	-10.7857	5.65761e-17	1.30359e-15	28.1585
PAK3	-1.95088	6.86164	-10.3745	3.32913e-16	6.60056e-15	26.3974
PAK6	-1.5161	6.62071	-10.1314	9.55347e-16	1.71122e-14	25.35
PALM3	-1.45149	7.08693	-8.09382	7.36206e-12	6.40715e-11	16.4689
PAN2	-1.00157	7.74757	-11.6875	1.22602e-18	4.12519e-17	31.9666
PANK1	-1.20246	7.98449	-7.30224	2.37598e-10	1.60266e-09	13.0313
PAQR4	1.13148	6.041	12.8622	9.51481e-21	5.71388e-19	36.7942
PARM1	-2.13038	8.83982	-9.51502	1.40895e-14	2.00105e-13	22.677
PARP8	-1.81136	8.43862	-15.8957	7.41962e-26	2.20469e-23	48.4625
PARPBP	1.09443	3.62545	9.38532	2.48883e-14	3.37949e-13	22.1121
PAX6	1.67845	4.40704	8.78184	3.54294e-13	3.85461e-12	19.4765
PAX8	-2.40337	9.14056	-12.1315	1.91833e-19	8.14312e-18	33.8099
PAXIP1-AS1	-1.11255	7.5749	-6.78549	2.23599e-09	1.28412e-08	10.8184
PBK	3.82323	5.17878	10.3406	3.85505e-16	7.53232e-15	26.2517
PBX1	-2.03978	8.73361	-11.4359	3.54207e-18	1.06216e-16	30.9122
PBX4	-1.80349	6.97434	-12.3669	7.2385e-20	3.41478e-18	34.7783
PBXIP1	-1.44815	8.35876	-12.0974	2.21018e-19	9.19434e-18	33.6692
PCBD1	-1.16445	8.39	-7.48145	1.08555e-10	7.72307e-10	13.8056
PCDH8	-1.70429	4.69831	-6.32598	1.59454e-08	8.03239e-08	8.88387
PCDHB14	1.05275	5.4173	5.16616	1.87217e-06	6.89446e-06	4.21753
PCDHB2	1.39356	4.68081	6.868	1.56633e-09	9.25079e-09	11.1694
PCED1B	1.05461	5.68589	3.99389	0.000149071	0.000402259	-0.0093036
PCOLCE	2.13126	8.42906	10.7727	5.98165e-17	1.3741e-15	28.1032
PCP4	-3.93863	9.59468	-12.5365	3.60084e-20	1.82273e-18	35.4721
PCYOX1	-1.8598	9.43858	-11.6147	1.66526e-18	5.41208e-17	31.6623
PDCD4-AS1	-1.5641	6.2235	-12.9452	6.78987e-21	4.21009e-19	37.1294
PDE1A	-2.22336	6.71915	-11.9636	3.85799e-19	1.48354e-17	33.1156
PDE8B	-4.09822	8.18337	-13.1331	3.17462e-21	2.14897e-19	37.8845
PDGFA	1.09854	5.84378	9.52663	1.33907e-14	1.90534e-13	22.7276
PDGFRB	1.26851	7.51103	7.27213	2.70956e-10	1.80954e-09	12.9015
PDGFRL	-2.43624	9.21674	-13.3152	1.52583e-21	1.15217e-19	38.6121
PDIA3	-1.22841	9.4674	-11.87	5.70357e-19	2.09803e-17	32.7271
PDIK1L	-1.65283	8.55379	-11.4426	3.44282e-18	1.03783e-16	30.9405
PDLIM4	1.13784	5.96132	11.1209	1.34902e-17	3.56416e-16	29.5832
PEBP1	-1.9566	11.8729	-15.8077	1.02654e-25	2.8643e-23	48.141
PEBP4	-2.94005	8.12955	-10.4958	1.97033e-16	4.12454e-15	26.9186
PEF1	-1.00431	9.96064	-11.1084	1.42238e-17	3.73639e-16	29.5306
PEG3	-2.13311	6.47268	-12.784	1.30828e-20	7.46469e-19	36.4779
PEG3-AS1	-1.09347	5.03194	-8.57915	8.66086e-13	8.79931e-12	18.59
PELI1	1.14599	6.27043	6.79521	2.14432e-09	1.23706e-08	10.8597
PER2	-1.14544	6.7157	-11.5774	1.94883e-18	6.25374e-17	31.506
PEX11A	-1.26749	7.27638	-10.0335	1.46253e-15	2.51978e-14	24.9269
PEX7	-1.10733	7.70986	-8.97809	1.49211e-13	1.74359e-12	20.3345
PFKFB2	-1.25441	6.23367	-12.2683	1.08769e-19	4.88928e-18	34.3737
PFKFB3	1.9488	7.21742	10.0442	1.39611e-15	2.41262e-14	24.9731
PGAP3	-1.09891	8.01053	-9.8648	3.05087e-15	4.94013e-14	24.1966
PGRMC2	-1.05236	9.13632	-9.55792	1.16744e-14	1.67994e-13	22.8638
PHF19	1.40003	6.53291	9.3135	3.41175e-14	4.50698e-13	21.799
PHOSPHO2	-2.04969	7.88008	-11.1799	1.04916e-17	2.8341e-16	29.8331
PHYHD1	-1.75753	7.75723	-12.019	3.06228e-19	1.2122e-17	33.3451
PI15	1.03087	4.5412	7.03723	7.52853e-10	4.6897e-09	11.8923
PIAS1	-1.10657	8.51224	-13.1696	2.74004e-21	1.88831e-19	38.0307
PIFO	-1.41293	7.23954	-9.05969	1.04172e-13	1.25643e-12	20.691
PIGP	-1.11912	9.94104	-10.3388	3.88458e-16	7.57064e-15	26.2441
PIGV	-1.06152	8.12216	-9.27386	4.06086e-14	5.29115e-13	21.6261
PIK3CB	-1.20441	7.53122	-11.6914	1.20592e-18	4.06952e-17	31.983
PJA1	-1.07033	9.71148	-9.69525	6.39943e-15	9.70947e-14	23.4608
PJA2	-1.11052	10.0773	-11.4709	3.05474e-18	9.31898e-17	31.0593
PKHD1L1	-4.64812	7.86095	-13.5841	5.21192e-22	4.48637e-20	39.6787
PKIA	-1.744	9.02993	-8.75551	3.97921e-13	4.29263e-12	19.3613
PKIB	1.60592	4.75931	8.47133	1.39348e-12	1.37842e-11	18.1184
PKM	1.29488	7.73934	13.9214	1.37186e-22	1.39503e-20	41.0037
PKNOX2	-1.31872	6.66897	-12.8372	1.05332e-20	6.21131e-19	36.6932
PLA2G7	-1.52468	8.77366	-8.54006	1.02907e-12	1.03358e-11	18.419
PLA2R1	-2.23914	6.15882	-13.9089	1.44093e-22	1.44599e-20	40.955
PLAT	1.02909	7.672	4.77553	8.54605e-06	2.84703e-05	2.74256
PLAU	3.06388	6.75651	12.122	1.99533e-19	8.43865e-18	33.7708
PLAUR	3.03895	6.75496	16.029	4.5445e-26	1.42436e-23	48.9479
PLCB4	-1.82225	7.4937	-7.14275	4.76026e-10	3.07062e-09	12.3449
PLCL1	-1.04175	5.02534	-7.85299	2.12557e-11	1.70463e-10	15.4189
PLEK	1.13365	6.8469	3.99759	0.000147162	0.000397293	0.00300838
PLEKHB1	-1.0349	5.36026	-13.4114	1.03783e-21	8.36114e-20	38.9948
PLEKHH1	-3.18715	8.58654	-12.1879	1.51803e-19	6.62835e-18	34.0425
PLEKHO1	1.29315	6.93641	6.11316	3.91301e-08	1.85631e-07	8.00161
PLK1	1.16066	4.89957	7.42335	1.39978e-10	9.74356e-10	13.5543
PLK2	1.85266	7.7089	11.4583	3.22095e-18	9.79992e-17	31.0067
PLK4	1.29432	4.20511	10.0864	1.162e-15	2.03954e-14	25.1554
PLLP	-2.30201	7.42092	-14.043	8.51027e-23	9.45219e-21	41.4776
PLOD1	1.19867	8.07655	9.8261	3.6123e-15	5.78777e-14	24.0288
PLP2	1.97214	8.88215	11.7594	9.06515e-19	3.12837e-17	32.2667
PLS1	-1.48618	7.37185	-6.64517	4.08752e-09	2.24976e-08	10.2238
PLSCR4	-1.73063	9.19814	-8.42483	1.71069e-12	1.66627e-11	17.9151
PLTP	2.30646	7.23523	10.8661	4.00709e-17	9.59018e-16	28.5013
PLXDC1	1.24731	5.34984	10.9465	2.84061e-17	7.01871e-16	28.8432
PMAIP1	3.73185	5.9071	11.3206	5.77172e-18	1.63033e-16	30.427
PMEPA1	1.5146	7.74067	10.0916	1.13598e-15	1.99933e-14	25.1779
PNMAL1	-2.63666	8.84748	-9.84994	3.25524e-15	5.24137e-14	24.1322
PNP	1.43214	8.19306	8.15344	5.66124e-12	5.01468e-11	16.7291
PNPLA4	-1.88239	7.92698	-11.8603	5.94023e-19	2.16768e-17	32.6867
PNRC2	-1.01442	10.2987	-9.28814	3.81394e-14	4.99502e-13	21.6884
POC1A	1.08021	4.95801	10.6706	9.27814e-17	2.06301e-15	27.6669
POLE2	1.92721	6.3372	10.4826	2.08585e-16	4.31894e-15	26.862
POLI	-1.994	7.84947	-12.0225	3.0186e-19	1.19906e-17	33.3594
POLQ	1.48735	4.93204	13.5055	7.12832e-22	5.97421e-20	39.3678
PON3	-1.77819	7.17694	-6.28051	1.93299e-08	9.6187e-08	8.6946
POPDC3	2.18837	4.14683	8.18219	4.98722e-12	4.47481e-11	16.8547
POR	-1.97122	9.05338	-12.1627	1.68515e-19	7.23381e-18	33.9387
POSTN	2.75136	5.49597	16.7013	3.97143e-27	1.78169e-24	51.3602
PP7080	-1.06806	6.49895	-9.11427	8.19239e-14	1.01047e-12	20.9295
PPAP2B	-3.46296	11.5043	-17.3424	4.09529e-28	2.56525e-25	53.6065
PPAPDC1A	1.96279	5.07784	8.63011	6.91743e-13	7.16158e-12	18.8128
PPAPDC2	-1.07136	7.5697	-10.7348	7.03856e-17	1.59448e-15	27.9415
PPARGC1A	-1.89217	5.74677	-11.3816	4.45602e-18	1.31215e-16	30.6841
PPEF1	1.30167	3.64976	6.27563	1.97336e-08	9.81318e-08	8.67428
PPFIBP2	-2.04887	8.87141	-12.5386	3.56954e-20	1.81491e-18	35.4808
PPL	-2.91941	8.24569	-11.4486	3.35602e-18	1.01568e-16	30.9659
PPM1L	-1.12195	5.6261	-9.84957	3.26046e-15	5.24609e-14	24.1306
PPP1R13B	-1.98517	7.60182	-12.2954	9.72383e-20	4.44075e-18	34.4851
PPP1R14B	1.4279	8.1859	12.5839	2.96436e-20	1.52758e-18	35.6653
PPP1R14C	-4.15328	9.8965	-14.2866	3.28697e-23	4.20144e-21	42.4217
PPP1R16A	-1.02032	6.8929	-8.83933	2.74988e-13	3.04684e-12	19.7279
PPP1R18	1.5501	8.16999	8.01997	1.01929e-11	8.64076e-11	16.1466
PPP1R9A	-1.45814	6.1377	-8.88023	2.29635e-13	2.58693e-12	19.9067
PRAME	1.1156	4.61242	4.87554	5.82313e-06	1.98737e-05	3.11451
PRC1	3.11661	6.32079	13.2067	2.36052e-21	1.67508e-19	38.1788
PRDM11	-1.01291	5.4789	-14.3972	2.13905e-23	2.96615e-21	42.8479
PRDM16	-2.47463	6.20214	-18.7776	3.03023e-30	5.3332e-27	58.4493
PRKCDBP	1.15519	7.13047	7.97655	1.23407e-11	1.03162e-10	15.9572
PRKCQ	-2.5704	8.16315	-19.8877	8.03066e-32	2.04157e-28	62.0245
PRKCQ-AS1	-1.06996	5.65164	-12.4286	5.61215e-20	2.69195e-18	35.0312
PRKCZ	-2.05227	8.29745	-10.3181	4.24986e-16	8.20563e-15	26.1548
PRKX	-2.18076	8.46568	-12.7768	1.34728e-20	7.66808e-19	36.4487
PRMT9	-1.11914	8.1984	-9.7384	5.29891e-15	8.20291e-14	23.6482
PROCR	1.32385	7.07293	9.14764	7.0737e-14	8.78168e-13	21.0752
PROM1	-3.39734	6.76995	-10.2104	6.77854e-16	1.24974e-14	25.6909
PROX1	-1.63597	6.41332	-11.1426	1.22954e-17	3.2826e-16	29.6754
PRR11	1.74287	8.25667	14.8656	3.53165e-24	6.51646e-22	44.6344
PRR15L	-3.49135	8.17611	-11.8678	5.75814e-19	2.10938e-17	32.7176
PRR16	1.78651	4.27802	10.6971	8.27912e-17	1.85712e-15	27.7802
PRSS16	-2.71521	7.12171	-13.7098	3.16479e-22	2.86207e-20	40.174
PRSS8	-2.39273	7.52242	-9.5085	1.4498e-14	2.05396e-13	22.6487
PRTG	-2.26277	6.6932	-14.1355	5.92366e-23	6.87987e-21	41.8372
PRUNE	-1.46014	7.32468	-14.0111	9.6439e-23	1.03593e-20	41.3535
PSMB9	1.19282	8.83207	3.73039	0.000366809	0.000922566	-0.866289
PSRC1	1.58233	5.94776	10.2831	4.94653e-16	9.43138e-15	26.004
PSTPIP2	1.46006	5.36216	8.98608	1.44046e-13	1.68841e-12	20.3694
PTCSC1	-3.57989	9.8188	-9.69307	6.46059e-15	9.78929e-14	23.4514
PTGER2	1.05152	4.48222	6.79368	2.15845e-09	1.24449e-08	10.8532
PTGFR	1.57818	3.65729	8.57726	8.7335e-13	8.86524e-12	18.5817
PTGS1	1.00168	6.08515	8.19976	4.61564e-12	4.18075e-11	16.9314
PTH2R	1.01369	3.67485	5.02223	3.29579e-06	1.16748e-05	3.66729
PTP4A3	1.12369	6.01083	9.90771	2.53003e-15	4.16455e-14	24.3825
PTPN22	1.1006	3.82407	5.47566	5.42875e-07	2.17568e-06	5.42507
PTPN3	-1.21959	6.98575	-9.08396	9.36143e-14	1.13932e-12	20.7971
PTPN4	-1.7454	6.52561	-14.1418	5.78104e-23	6.85338e-21	41.8614
PTPRM	-1.35169	9.85511	-8.87938	2.30498e-13	2.59409e-12	19.903
PTPRN2	-1.7922	7.24819	-15.8437	8.98882e-26	2.53906e-23	48.2725
PTX3	1.92921	6.54581	5.63798	2.80534e-07	1.1743e-06	6.07053
PVRL3	-1.14614	8.42415	-5.87241	1.06841e-07	4.74757e-07	7.01601
PWAR5	-1.65124	4.63625	-8.65965	6.07242e-13	6.33837e-12	18.9421
PWAR6	-3.38132	8.39156	-12.445	5.24501e-20	2.52644e-18	35.0984
PXDN	3.19057	7.37607	20.1971	2.99088e-32	9.77589e-29	62.9958
PXK	-1.20567	7.58378	-13.3467	1.34479e-21	1.03948e-19	38.7375
PYCARD	1.04074	7.59005	5.40185	7.31184e-07	2.86709e-06	5.13425
PYCR1	1.24625	6.48519	14.2454	3.85881e-23	4.77241e-21	42.2625
PYGL	1.44845	7.43183	10.8603	4.10849e-17	9.81234e-16	28.4765
QPCT	1.70678	7.00699	6.59356	5.09938e-09	2.76675e-08	10.0059
QPRT	1.83462	5.84386	9.1358	7.45212e-14	9.23143e-13	21.0235
RAB17	-1.41832	7.29861	-10.8244	4.79175e-17	1.11759e-15	28.3236
RAB23	-1.025	8.68936	-8.45926	1.46969e-12	1.4488e-11	18.0656
RAB25	-3.16417	8.58747	-9.88554	2.78687e-15	4.54481e-14	24.2865
RAB27B	1.15803	3.97623	11.2021	9.54627e-18	2.60022e-16	29.9269
RAB31	1.33267	9.88133	11.2394	8.14728e-18	2.2459e-16	30.0844
RAB39B	-1.20589	5.1808	-8.72552	4.54173e-13	4.85356e-12	19.2301
RAB3B	1.14024	4.05986	7.81435	2.51923e-11	1.99792e-10	15.2507
RAC2	1.75436	7.1714	4.77052	8.71099e-06	2.89775e-05	2.72404
RACGAP1	2.4121	7.3364	11.0943	1.51083e-17	3.94159e-16	29.4707
RAD51	1.12868	4.82854	10.9313	3.03148e-17	7.45808e-16	28.7786
RAD51AP1	2.09545	6.35748	9.17813	6.18591e-14	7.76378e-13	21.2083
RAD54B	1.4336	5.40357	9.01263	1.28155e-13	1.51534e-12	20.4854
RAD54L	1.60148	5.72738	12.1186	2.02376e-19	8.54311e-18	33.7567
RAI14	1.91155	8.39345	14.1133	6.46197e-23	7.42964e-21	41.7509
RAI2	-1.93164	6.97811	-12.2399	1.22365e-19	5.4153e-18	34.2567
RALA	1.1154	9.0968	10.9152	3.24757e-17	7.94699e-16	28.7102
RAMP3	-1.12978	7.8921	-9.29027	3.77834e-14	4.95406e-13	21.6977
RAP1GAP	-1.72648	7.20758	-14.6452	8.21332e-24	1.32339e-21	43.7974
RAPH1	-1.00907	7.96866	-7.3401	2.01403e-10	1.36861e-09	13.1946
RASAL2	1.02392	5.42194	14.8601	3.60615e-24	6.5853e-22	44.6137
RASEF	-1.52221	7.52897	-8.68428	5.44757e-13	5.73851e-12	19.0498
RASSF6	-1.56697	4.88973	-10.2505	5.69719e-16	1.07462e-14	25.8636
RASSF9	-1.87686	6.24044	-10.8655	4.01704e-17	9.60395e-16	28.4988
RBKS	-1.46387	8.10697	-13.7006	3.28211e-22	2.95648e-20	40.1378
RBM11	-1.20836	4.6485	-10.3324	3.99441e-16	7.75825e-15	26.2164
RBM26-AS1	-1.23944	5.59455	-8.84091	2.73078e-13	3.02862e-12	19.7348
RBM47	-1.5626	7.51238	-13.8803	1.61302e-22	1.59766e-20	40.843
RBMS3	-1.33907	7.08749	-12.8042	1.20484e-20	6.9789e-19	36.5597
RBP7	-1.65479	7.89214	-8.9717	1.53466e-13	1.78875e-12	20.3066
RBPMS-AS1	-1.91754	7.17332	-14.4022	2.09802e-23	2.927e-21	42.8671
RCAN2	-1.9572	8.63053	-11.2314	8.42673e-18	2.31735e-16	30.0509
RCC2	1.02736	9.18122	10.4565	2.33471e-16	4.76948e-15	26.75
RCHY1	-1.03465	7.73191	-9.78686	4.28764e-15	6.75368e-14	23.8585
RCN3	1.55338	6.46794	11.7819	8.25048e-19	2.88641e-17	32.3602
RDH12	-1.00756	5.57293	-6.28179	1.92258e-08	9.56897e-08	8.69991
RECQL	1.02476	8.27803	8.3938	1.96162e-12	1.88738e-11	17.7794
REEP1	-1.31775	6.57753	-7.801	2.67156e-11	2.11141e-10	15.1926
REEP5	-1.33406	11.219	-16.2278	2.19758e-26	7.61828e-24	49.6673
RELN	-2.04791	7.74365	-9.69971	6.27578e-15	9.55992e-14	23.4802
RERGL	-1.38146	5.0242	-6.43	1.02511e-08	5.32213e-08	9.31848
RFC4	1.2132	7.73517	7.79691	2.72001e-11	2.14525e-10	15.1748
RGN	-2.98216	7.50909	-13.6789	3.57667e-22	3.19664e-20	40.0525
RGS1	1.07563	5.94162	3.79499	0.000295116	0.000755201	-0.659852
RGS16	-1.44425	7.0093	-11.8455	6.31989e-19	2.28796e-17	32.6251
RGS18	1.29525	4.79418	4.91982	4.90761e-06	1.69156e-05	3.28052
RGS4	2.1932	5.96249	9.25213	4.46775e-14	5.78179e-13	21.5313
RGS8	-1.35555	5.76845	-11.9946	3.39074e-19	1.31939e-17	33.2439
RHBDD2	-1.0254	8.77893	-7.71629	3.87624e-11	2.99218e-10	14.8243
RHPN2	-1.16454	6.66116	-4.99888	3.61016e-06	1.26785e-05	3.57874
RILPL2	-1.24927	9.87083	-14.5927	1.00527e-23	1.56467e-21	43.597
RIPK4	-1.22963	6.87819	-8.61379	7.43356e-13	7.66125e-12	18.7415
RMI2	1.75327	6.91154	8.56128	9.37101e-13	9.47872e-12	18.5118
RMST	-2.24869	6.84733	-12.1056	2.13595e-19	8.90298e-18	33.7031
RNASE2	1.55864	4.20241	10.6054	1.22836e-16	2.67666e-15	27.3881
RNASE4	-1.27102	8.07108	-8.374	2.14062e-12	2.04584e-11	17.6929
RNASE6	2.1595	7.18751	6.47827	8.34594e-09	4.39179e-08	9.52085
RNASEH2A	1.04573	7.88678	6.76894	2.40122e-09	1.37315e-08	10.7481
RND3	1.89449	8.65101	8.53582	1.04849e-12	1.05171e-11	18.4004
RNF128	-2.60578	9.56817	-8.133	6.19491e-12	5.44942e-11	16.6398
RNF144B	-1.13219	7.72465	-8.78948	3.42565e-13	3.73945e-12	19.5099
RNF146	-1.1417	8.63313	-10.0741	1.22573e-15	2.14246e-14	25.1024
RNF150	-1.57215	6.75562	-10.2247	6.37212e-16	1.18339e-14	25.7523
RNF157-AS1	-2.38319	6.33912	-12.9472	6.73612e-21	4.19674e-19	37.1373
RNF170	-1.06506	7.44328	-12.5625	3.23701e-20	1.65689e-18	35.5779
RNF175	1.21745	4.60859	8.68242	5.49225e-13	5.7776e-12	19.0417
RNF180	-2.81172	6.58923	-14.963	2.43741e-24	4.68639e-22	45.0021
RNF24	1.16775	6.34664	10.6746	9.11939e-17	2.03364e-15	27.6841
ROR1	1.89819	5.05408	13.4328	9.53028e-22	7.7329e-20	39.0795
ROR2	-1.21496	6.2006	-5.93621	8.19709e-08	3.70358e-07	7.27584
RORC	-1.65398	7.10166	-13.7861	2.33923e-22	2.21164e-20	40.474
RP11-111M22.3	-1.29315	7.27259	-7.09777	5.78836e-10	3.68189e-09	12.1518
RP11-119F7.5	-1.29812	6.13247	-7.28954	2.51143e-10	1.68855e-09	12.9765
RP11-121C2.2	-1.12572	7.02498	-9.345	2.97095e-14	3.97052e-13	21.9363
RP11-127B20.2	-1.86734	6.16815	-12.354	7.63227e-20	3.57841e-18	34.7257
RP11-140I16.3	-1.37179	6.09985	-10.4437	2.46783e-16	5.01455e-15	26.6949
RP11-164P12.4	-1.37963	5.79262	-8.68411	5.45158e-13	5.74009e-12	19.049
RP11-16N11.2	-1.6349	5.35574	-13.398	1.09515e-21	8.73068e-20	38.9414
RP11-196G18.23	-1.17293	5.98953	-7.65467	5.08032e-11	3.82865e-10	14.5566
RP11-247L20.4	-1.17713	6.26414	-9.05334	1.07121e-13	1.28591e-12	20.6633
RP11-271C24.3	1.19283	5.5745	5.31138	1.05104e-06	4.03012e-06	4.78016
RP11-355B11.2	-2.06504	6.72278	-13.7196	3.04358e-22	2.76338e-20	40.2127
RP11-382B18.4	-1.29243	6.03745	-7.96239	1.31342e-11	1.09277e-10	15.8955
RP11-395B7.7	-1.02583	8.03877	-8.35468	2.33105e-12	2.20846e-11	17.6084
RP1-142L7.8	1.04288	4.50581	6.24376	2.25781e-08	1.11166e-07	8.54191
RP1-151F17.2	-1.77031	6.96134	-11.1685	1.10157e-17	2.96867e-16	29.7846
RP11-532F12.5	-2.93985	8.76142	-12.8568	9.72621e-21	5.82001e-19	36.7724
RP11-539I5.1	-2.25827	6.1346	-14.0043	9.90618e-23	1.05913e-20	41.3269
RP11-53O19.3	-1.07476	7.70584	-8.01639	1.03547e-11	8.77139e-11	16.131
RP11-5C23.1	-1.25695	7.14076	-12.4629	4.87291e-20	2.36212e-18	35.1715
RP11-672L10.6	-1.17473	6.02132	-7.72325	3.75945e-11	2.90693e-10	14.8545
RP11-710C12.1	-2.56087	6.40841	-11.2883	6.62011e-18	1.84717e-16	30.2907
RP11-747H7.3	-1.55006	5.52424	-10.6782	8.97901e-17	2.00625e-15	27.6995
RP11-757F18.5	-1.26569	5.40075	-5.73201	1.90774e-07	8.1801e-07	6.44798
RP11-774O3.3	-1.24447	5.67018	-11.5398	2.28373e-18	7.20713e-17	31.3484
RP11-792A8.4	-1.08387	5.09362	-8.84885	2.63684e-13	2.93295e-12	19.7695
RP11-819C21.1	-1.61664	5.76522	-12.9256	7.35176e-21	4.49755e-19	37.0504
RP11-96D1.11	-2.1053	6.27511	-11.3283	5.58522e-18	1.58942e-16	30.4596
RP1-93H18.6	1.33738	4.97183	4.24165	6.19902e-05	0.000179196	0.830911
RP3-406A7.7	-1.00563	5.2727	-8.37942	2.09008e-12	1.9992e-11	17.7165
RP4-813F11.4	-2.5562	6.0449	-17.0575	1.11698e-27	5.94335e-25	52.6147
RP6-24A23.7	-2.02196	6.0786	-8.93196	1.82828e-13	2.09071e-12	20.1328
RP6-99M1.2	1.74926	4.01829	6.0932	4.25479e-08	2.01032e-07	7.91937
RPA3OS	-1.0737	7.39672	-7.40107	1.54303e-10	1.06757e-09	13.4579
RPARP-AS1	-1.79762	5.94142	-10.6276	1.11646e-16	2.46094e-15	27.483
RPL17	1.60051	6.42276	7.542	8.32662e-11	6.03653e-10	14.0679
RPP40	1.0936	7.45062	9.53624	1.28384e-14	1.83245e-13	22.7694
RPS6KA6	-1.45181	5.22315	-13.036	4.70095e-21	3.05562e-19	37.4946
RRAGD	-1.15948	9.07711	-6.7993	2.10683e-09	1.21635e-08	10.8771
RRM2	4.30018	6.94085	10.2432	5.879e-16	1.10436e-14	25.8324
RSAD2	1.13629	6.53167	4.72964	1.01786e-05	3.3528e-05	2.57324
RSPH1	-2.84819	7.01111	-15.139	1.25013e-24	2.57685e-22	45.6641
RSPO3	-1.13469	5.93568	-5.3458	9.15783e-07	3.54837e-06	4.91454
RTN4IP1	-1.04253	7.22692	-10.2645	5.36183e-16	1.01893e-14	25.9239
RUNX1-IT1	1.40903	5.36722	8.55581	9.59978e-13	9.68871e-12	18.4879
RUNX2	1.07065	4.96825	9.66892	7.18057e-15	1.07738e-13	23.3464
RUNX3	1.02337	5.57782	4.40861	3.3786e-05	0.000102211	1.41455
RWDD4	-1.15526	9.15137	-11.9508	4.07023e-19	1.5573e-17	33.0624
RYR2	-2.14505	6.15094	-13.803	2.18868e-22	2.07788e-20	40.5401
S100A11	1.42904	9.42792	11.2782	6.90832e-18	1.9229e-16	30.2483
S100A11P1	1.2052	8.65105	10.6642	9.53737e-17	2.11244e-15	27.6396
S100A14	-2.0799	7.98893	-8.9411	1.7561e-13	2.01603e-12	20.1728
S100A16	1.23846	9.94127	8.78373	3.51369e-13	3.83008e-12	19.4847
S100A2	1.09825	7.57785	3.73667	0.000359166	0.000905235	-0.84632
S100A3	1.10148	5.47145	9.25706	4.37212e-14	5.66444e-13	21.5528
S100A4	1.12976	10.2632	5.81285	1.36709e-07	5.98411e-07	6.7744
S100A8	1.86027	5.55892	7.171	4.20964e-10	2.73471e-09	12.4663
S100A9	2.14271	6.49674	9.05811	1.04898e-13	1.26385e-12	20.6841
S1PR3	1.24566	6.22272	8.23065	4.02792e-12	3.69226e-11	17.0664
SAC3D1	1.02049	6.89505	7.71679	3.86768e-11	2.98759e-10	14.8264
SACS	1.72824	7.19087	10.0538	1.33871e-15	2.32572e-14	25.0148
SALL1	-3.91081	8.12308	-11.1717	1.08634e-17	2.93106e-16	29.7985
SALL2	-2.36851	8.63804	-13.3647	1.25159e-21	9.77352e-20	38.8088
SAMD12	-1.64932	5.78521	-10.233	6.14691e-16	1.14809e-14	25.7881
SAMD13	-2.38706	6.98681	-12.1744	1.60495e-19	6.91547e-18	33.9871
SAMD9	1.09246	5.81425	6.27924	1.94347e-08	9.66874e-08	8.68929
SAMHD1	1.17073	7.20049	6.88118	1.47963e-09	8.79093e-09	11.2256
SAMSN1	1.45523	4.66487	5.84522	1.19578e-07	5.28073e-07	6.9056
SAP18	-1.19346	9.52332	-14.1753	5.07225e-23	6.14038e-21	41.9912
SASH1	-1.4398	10.1494	-10.0963	1.11289e-15	1.97082e-14	25.1984
SATB2	1.58595	4.20605	10.9226	3.14523e-17	7.72963e-16	28.742
SBSPON	-1.07821	4.83799	-9.67373	7.03113e-15	1.05907e-13	23.3673
SCAMP1-AS1	-1.46879	8.07291	-10.2815	4.98015e-16	9.48758e-15	25.9972
SCARA5	-1.64088	6.51246	-11.3142	5.93022e-18	1.66834e-16	30.4001
SCD	1.51709	5.98477	11.3358	5.41098e-18	1.54948e-16	30.4911
SCG5	1.27629	7.63656	4.35482	4.11377e-05	0.00012262	1.22503
SCGB2A1	-2.11619	6.03049	-7.56432	7.55069e-11	5.51243e-10	14.1646
SCN3A	-1.93471	5.77699	-9.35353	2.86162e-14	3.84237e-13	21.9735
SCN3B	-1.45849	5.79244	-9.75868	4.84953e-15	7.57387e-14	23.7362
SCN4B	-2.1434	6.59237	-9.86297	3.07524e-15	4.97606e-14	24.1887
SCNN1B	-1.44591	5.94857	-11.0236	2.04283e-17	5.19333e-16	29.1709
SCNN1G	-1.32493	5.14756	-12.0938	2.24298e-19	9.29701e-18	33.6545
SCO2	1.29056	7.80527	8.18298	4.96992e-12	4.46278e-11	16.8581
SCUBE2	-1.08749	5.93558	-7.02428	7.96363e-10	4.93922e-09	11.8368
SCUBE3	-1.6656	7.06125	-12.7354	1.59467e-20	8.79182e-19	36.2813
SDC2	-2.06196	10.9442	-11.7356	1.00184e-18	3.41612e-17	32.1673
SDF2L1	-1.24007	9.5012	-7.08656	6.07727e-10	3.85174e-09	12.1037
SDPR	-3.2443	8.26582	-15.1071	1.41042e-24	2.8558e-22	45.5445
SDSL	-1.63647	8.06724	-11.6816	1.25701e-18	4.19859e-17	31.9418
SEC11C	-1.20548	7.92159	-11.601	1.76438e-18	5.70184e-17	31.6048
SEC62	-1.47849	9.62663	-14.7733	5.02523e-24	8.77688e-22	44.2847
SEC63	-1.15018	7.64224	-12.2622	1.11575e-19	5.00408e-18	34.3484
SECISBP2	-1.11522	8.56806	-12.7057	1.80043e-20	9.78477e-19	36.1607
SECTM1	1.12383	5.92784	7.25502	2.91944e-10	1.94176e-09	12.8278
SELENBP1	-3.76352	9.84318	-15.4877	3.37201e-25	8.13069e-23	46.9627
SELM	-1.19369	9.84383	-8.15133	5.71398e-12	5.05748e-11	16.7199
SEMA3C	1.66464	5.10084	7.35946	1.85076e-10	1.2682e-09	13.2782
SEMA3D	-1.30312	4.98955	-9.62263	8.7933e-15	1.29383e-13	23.1452
SENP8	-1.54011	6.25345	-11.9985	3.33509e-19	1.30216e-17	33.2603
SEPP1	-1.32431	9.19835	-8.84787	2.64829e-13	2.94426e-12	19.7652
SEPT11	1.04509	6.33295	8.42174	1.73423e-12	1.6856e-11	17.9015
SERPINE1	2.91131	6.20468	10.8577	4.15429e-17	9.91139e-16	28.4654
SERPINH1	1.82996	8.83765	13.7546	2.65039e-22	2.4551e-20	40.3501
SERTM1	-2.95053	5.99431	-8.56165	9.35582e-13	9.46755e-12	18.5134
SESN1	-1.02234	8.66014	-7.99274	1.14916e-11	9.64958e-11	16.0278
SETBP1	-1.17995	7.863	-9.15889	6.73225e-14	8.39421e-13	21.1243
SFN	1.4528	6.80836	5.84364	1.20366e-07	5.31346e-07	6.89917
SFTA3	-4.63729	9.56008	-10.3311	4.01766e-16	7.79017e-15	26.2106
SFTPD	-1.57422	6.5777	-13.0243	4.92844e-21	3.18538e-19	37.4477
SFXN3	1.05742	6.4295	13.9524	1.21427e-22	1.25146e-20	41.1249
SGCD	-1.15735	6.76281	-6.91626	1.27145e-09	7.63739e-09	11.3752
SGK223	-2.14592	9.95351	-11.7763	8.44436e-19	2.94523e-17	32.3371
SGMS1	-1.00503	8.70925	-5.96097	7.39436e-08	3.36683e-07	7.37694
SGOL2	1.3912	5.4728	7.78231	2.90027e-11	2.278e-10	15.1113
SGPP2	-1.95768	7.11409	-7.24872	3.00072e-10	1.99293e-09	12.8007
SH2B3	1.15355	7.49259	7.35642	1.87547e-10	1.28321e-09	13.2651
SH3BGR	-1.85821	7.22223	-12.5149	3.93475e-20	1.95286e-18	35.384
SH3BGRL2	-2.92241	9.89927	-15.0991	1.45409e-24	2.91838e-22	45.5143
SH3BGRL3	1.60595	9.13457	9.63248	8.4222e-15	1.24564e-13	23.188
SH3RF1	-1.2436	8.27167	-10.4709	2.19413e-16	4.51453e-15	26.8117
SH3RF3	1.20092	6.41952	8.19535	4.7062e-12	4.25773e-11	16.9121
SH3YL1	-1.10734	7.86752	-10.2238	6.39526e-16	1.18673e-14	25.7487
SHANK2	-1.53602	5.6404	-12.1071	2.12228e-19	8.88659e-18	33.7095
SHC2	-1.10271	6.89626	-9.49731	1.52273e-14	2.14665e-13	22.5999
SHCBP1	3.36697	4.93428	10.394	3.05984e-16	6.09305e-15	26.4812
SHE	-1.10292	7.3737	-10.2641	5.3708e-16	1.01894e-14	25.9222
SHISA2	-3.01974	9.39108	-10.1213	9.9832e-16	1.78171e-14	25.3063
SHMT2	1.45364	7.52952	10.4289	2.63072e-16	5.30784e-15	26.6313
SHOX2	1.68048	4.43918	10.7081	7.89376e-17	1.77765e-15	27.8275
SHPRH	-1.26074	7.92963	-10.0932	1.12788e-15	1.99041e-14	25.1851
SIGLEC1	1.50266	6.03598	9.25773	4.35913e-14	5.65402e-13	21.5557
SIGLEC10	1.23292	5.28448	6.09807	4.16873e-08	1.97108e-07	7.93944
SIGLEC15	2.03435	6.65244	8.45687	1.48529e-12	1.46354e-11	18.0552
SIX1	1.30025	5.54126	12.6241	2.51433e-20	1.32248e-18	35.8289
SKA1	1.13523	3.34551	7.71485	3.90082e-11	3.00913e-10	14.818
SKA3	1.42515	5.27985	10.364	3.4832e-16	6.86439e-15	26.3524
SKIDA1	-1.25469	5.03825	-9.06979	9.96395e-14	1.20686e-12	20.7352
SLA	1.43481	7.11362	5.33578	9.53297e-07	3.68192e-06	4.87537
SLAIN1	-1.76902	6.29697	-9.02655	1.20531e-13	1.43112e-12	20.5463
SLAMF8	2.34859	5.98385	7.70615	4.0527e-11	3.10952e-10	14.7802
SLC12A8	-1.54506	8.18259	-7.76523	3.12633e-11	2.44048e-10	15.037
SLC16A1	2.17758	5.13419	13.3857	1.15068e-21	9.08606e-20	38.8923
SLC16A2	-1.49796	8.01717	-10.3562	3.60263e-16	7.08755e-15	26.3189
SLC16A4	-1.05352	7.40427	-4.41481	3.30251e-05	0.000100098	1.43649
SLC16A5	-1.10433	6.65373	-11.2603	7.45429e-18	2.06732e-16	30.1728
SLC16A9	-2.61331	8.1603	-9.61365	9.14599e-15	1.34167e-13	23.1062
SLC18B1	-1.01983	8.30019	-7.57768	7.12143e-11	5.22741e-10	14.2225
SLC1A1	-2.25187	8.00847	-11.778	8.38489e-19	2.92895e-17	32.3442
SLC1A3	1.57182	5.0143	9.86898	2.99567e-15	4.8645e-14	24.2147
SLC1A5	1.43798	6.03995	12.5151	3.93126e-20	1.95286e-18	35.3849
SLC20A1	2.35498	7.65932	11.3955	4.20135e-18	1.24195e-16	30.7426
SLC20A2	-2.05755	8.34941	-16.67	4.444e-27	1.95536e-24	51.249
SLC22A4	1.34521	4.58487	9.51009	1.43971e-14	2.04093e-13	22.6556
SLC24A3	-1.10249	6.77273	-6.76192	2.4749e-09	1.41246e-08	10.7183
SLC25A15	-2.49857	8.08496	-9.44804	1.89004e-14	2.6161e-13	22.3854
SLC25A21-AS1	-1.16131	5.93495	-8.34109	2.47509e-12	2.33912e-11	17.549
SLC25A23	-1.49043	7.09591	-10.8695	3.949e-17	9.47098e-16	28.5158
SLC25A29	-1.56988	7.59563	-8.93726	1.78604e-13	2.04938e-12	20.156
SLC25A43	1.49567	6.44078	7.85342	2.12158e-11	1.70202e-10	15.4208
SLC25A45	-1.12751	5.9051	-10.4706	2.19742e-16	4.51725e-15	26.8102
SLC26A4	-5.55654	9.98393	-15.1493	1.20276e-24	2.50173e-22	45.7024
SLC26A4-AS1	-5.16585	8.74652	-16.4432	1.00569e-26	3.90004e-24	50.4409
SLC26A7	-3.65425	8.29121	-15.3751	5.13815e-25	1.18748e-22	46.5454
SLC27A2	-1.5044	6.48039	-7.83081	2.34329e-11	1.86615e-10	15.3224
SLC2A10	-1.09111	8.87917	-6.06332	4.82222e-08	2.25859e-07	7.79646
SLC2A14	1.39602	7.12595	6.19525	2.77057e-08	1.34302e-07	8.34077
SLC2A3	1.4231	7.65785	6.59548	5.05764e-09	2.74671e-08	10.014
SLC2A6	1.05731	4.8938	7.368	1.78296e-10	1.22321e-09	13.3151
SLC31A2	1.4199	7.37753	8.28771	3.13204e-12	2.92018e-11	17.3156
SLC35A3	-1.03834	8.59726	-7.59158	6.7003e-11	4.93888e-10	14.2828
SLC35F2	1.17708	6.83124	9.98297	1.82248e-15	3.0951e-14	24.7084
SLC37A2	1.0288	5.23858	7.29191	2.48561e-10	1.67218e-09	12.9867
SLC41A1	-1.11164	8.67331	-9.9457	2.14378e-15	3.58812e-14	24.5471
SLC43A3	-1.29431	8.72002	-8.21742	4.26982e-12	3.89683e-11	17.0086
SLC45A4	-1.06374	7.51933	-6.15629	3.26431e-08	1.56544e-07	8.17965
SLC47A1	-1.29013	6.64211	-6.10906	3.98082e-08	1.88613e-07	7.98473
SLC48A1	-1.36631	7.23095	-12.1823	1.55314e-19	6.75588e-18	34.0197
SLC4A11	-1.5415	6.67082	-8.84678	2.66105e-13	2.95557e-12	19.7604
SLC4A4	-2.20006	6.57179	-13.2727	1.80964e-21	1.33996e-19	38.4427
SLC4A7	1.13883	5.18538	10.5347	1.66586e-16	3.53899e-15	27.0854
SLC5A3	-1.5501	9.01335	-8.87432	2.35695e-13	2.64868e-12	19.8808
SLC6A13	-2.25458	6.73729	-18.6231	5.08044e-30	7.74936e-27	57.9398
SLC6A8	1.15988	5.75086	8.67508	5.6731e-13	5.95142e-12	19.0095
SLC7A5	2.23529	6.57659	8.67781	5.60507e-13	5.88815e-12	19.0215
SLC7A7	1.60867	7.94939	8.35235	2.35516e-12	2.22946e-11	17.5982
SLC9B2	1.38179	5.13602	5.60645	3.19088e-07	1.32524e-06	5.94456
SLCO2A1	-1.95676	8.55751	-10.964	2.63501e-17	6.53185e-16	28.9179
SLCO2B1	1.01217	6.45132	7.34851	1.94138e-10	1.32475e-09	13.231
SLCO4A1	1.20394	5.21606	10.3134	4.33735e-16	8.36046e-15	26.1345
SLIT3	-1.14579	6.42665	-12.8852	8.66441e-21	5.22179e-19	36.8872
SLITRK5	-1.14742	5.23791	-5.63611	2.82684e-07	1.18241e-06	6.06306
SMAD9	-2.62888	7.81111	-16.4834	8.69642e-27	3.49077e-24	50.5848
SMAGP	1.07484	6.62045	6.46009	9.01811e-09	4.71729e-08	9.4446
SMC4	1.26191	6.77103	10.6787	8.95726e-17	2.00334e-15	27.7019
SMCO4	-1.05026	9.80371	-10.4175	2.76425e-16	5.54859e-15	26.5821
SMIM19	-1.55274	10.4459	-11.5171	2.51326e-18	7.80237e-17	31.2532
SMIM3	1.22618	8.13405	9.21196	5.33083e-14	6.77985e-13	21.356
SMIM5	-2.18872	7.80093	-14.6522	7.99635e-24	1.29756e-21	43.824
SMOC2	-1.91333	7.29529	-9.08561	9.29386e-14	1.13289e-12	20.8043
SNAI2	2.69393	7.81287	10.9679	2.59156e-17	6.44509e-16	28.9344
SNHG19	-1.67694	10.3484	-8.01364	1.04811e-11	8.86531e-11	16.119
SNHG3	1.30705	4.83434	7.89877	1.73784e-11	1.4145e-10	15.6183
SNHG5	-1.08044	12.3506	-7.60321	6.36698e-11	4.7114e-10	14.3333
SNHG8	-1.3477	10.9919	-9.56507	1.13143e-14	1.6301e-13	22.8949
SNHG9	-1.26406	6.3113	-7.6097	6.1883e-11	4.59404e-10	14.3614
SNORA72	1.0026	4.07186	7.61139	6.14268e-11	4.56461e-10	14.3688
SNORD116-17	-1.16357	5.91078	-6.89409	1.39933e-09	8.34202e-09	11.2806
SNORD3A	-1.9295	6.53651	-4.54169	2.06503e-05	6.47854e-05	1.88927
SNORD50A	-1.7703	8.90318	-11.2666	7.25616e-18	2.01482e-16	30.1995
SNORD89	1.32013	6.06436	11.1318	1.28751e-17	3.42141e-16	29.6296
SNRPN	-1.42886	8.06343	-11.2308	8.44823e-18	2.32047e-16	30.0484
SNTA1	-1.46152	7.8667	-11.1395	1.24626e-17	3.3195e-16	29.662
SNX1	-1.00136	8.15318	-11.6299	1.56207e-18	5.11306e-17	31.7259
SNX10	1.85026	7.26006	6.26219	2.08869e-08	1.03395e-07	8.61844
SNX2	-1.00292	8.19775	-13.3558	1.29683e-21	1.00581e-19	38.7736
SNX4	-1.06662	8.90401	-10.993	2.32758e-17	5.8522e-16	29.0412
SOD3	-1.74479	7.695	-10.0661	1.26923e-15	2.21342e-14	25.0678
SORBS2	-1.78371	7.09529	-10.7035	8.05269e-17	1.81166e-15	27.8077
SORD	-3.81196	9.90993	-20.7777	4.82165e-33	2.20639e-29	64.7888
SORL1	-1.01032	8.005	-7.89294	1.78302e-11	1.44819e-10	15.5929
SOSTDC1	-1.49146	5.48832	-8.47236	1.38715e-12	1.37335e-11	18.1229
SOWAHA	-1.82789	6.22703	-12.9562	6.49523e-21	4.06041e-19	37.1735
SOX11	1.32445	3.91549	8.36355	2.24163e-12	2.13169e-11	17.6472
SOX9	-1.1265	9.15047	-5.94412	7.93169e-08	3.59147e-07	7.30812
SPAG4	1.14055	5.935	5.82365	1.30739e-07	5.73926e-07	6.81815
SPATA17	-1.37196	5.3282	-11.3365	5.39538e-18	1.54695e-16	30.494
SPATA20	-1.06383	9.16189	-8.9658	1.57504e-13	1.83301e-12	20.2808
SPC25	2.41267	3.86108	10.0603	1.30153e-15	2.26802e-14	25.0428
SPDL1	1.22213	6.68242	7.94755	1.40211e-11	1.16023e-10	15.8308
SPHK1	2.32568	6.90547	13.1434	3.04526e-21	2.07368e-19	37.9258
SPINT2	-2.69912	10.8309	-11.7578	9.12588e-19	3.13985e-17	32.26
SPOCD1	1.35144	4.79673	9.95026	2.10159e-15	3.53042e-14	24.5668
SPOCK1	2.20664	7.1141	8.75159	4.04849e-13	4.36109e-12	19.3442
SPP1	2.77263	5.46839	7.96939	1.27357e-11	1.06231e-10	15.926
SPRY4	1.37821	7.34464	9.21794	5.19244e-14	6.60751e-13	21.3821
SPRY4-IT1	1.53642	5.91248	9.09299	8.99661e-14	1.10135e-12	20.8365
SPTLC3	-1.1611	6.22189	-9.90517	2.55813e-15	4.20776e-14	24.3715
SPX	-2.90745	6.87995	-17.1199	8.95819e-28	5.25547e-25	52.8328
SRD5A1	1.79115	6.0675	12.1275	1.95001e-19	8.26227e-18	33.7936
SRGAP2	1.11592	5.41563	14.6957	6.76571e-24	1.12174e-21	43.9897
SRGAP2C	1.14686	7.05776	6.86228	1.60553e-09	9.458e-09	11.145
SRGN	1.52668	8.06586	6.41281	1.10288e-08	5.69589e-08	9.24653
SRM	1.38569	7.94776	9.01755	1.25409e-13	1.48441e-12	20.5069
SRPX2	1.95243	4.12924	19.8884	8.01097e-32	2.04157e-28	62.0269
SSBP2	-1.25734	6.46638	-9.967	1.95375e-15	3.30391e-14	24.6393
SSPN	-1.02092	6.9236	-10.3664	3.44815e-16	6.80621e-15	26.3625
ST3GAL1	-1.21401	8.19265	-9.58031	1.05837e-14	1.52972e-13	22.9612
ST3GAL5	-1.63711	9.54034	-9.02169	1.23142e-13	1.45984e-12	20.525
ST6GAL2	-3.3435	7.39234	-12.8344	1.06515e-20	6.26497e-19	36.6821
ST6GALNAC2	-2.22974	7.62623	-11.4371	3.52413e-18	1.05817e-16	30.9173
ST6GALNAC3	-2.49426	7.62273	-11.8185	7.07554e-19	2.52123e-17	32.5129
ST7-AS1	-1.6078	5.54638	-10.9065	3.37091e-17	8.22244e-16	28.6731
ST8SIA4	1.1086	4.92311	5.7358	1.87824e-07	8.05666e-07	6.46323
STAC	1.42638	6.11244	9.30949	3.47235e-14	4.58174e-13	21.7815
STC2	1.13662	5.91512	7.88755	1.82582e-11	1.48085e-10	15.5694
STEAP1	3.32426	5.85606	13.8816	1.60493e-22	1.59656e-20	40.848
STEAP1B	1.19359	4.67788	7.27414	2.68594e-10	1.79586e-09	12.9102
STEAP3	1.5561	5.70044	12.226	1.29629e-19	5.68742e-18	34.1994
STIL	2.17505	5.95215	12.8539	9.83976e-21	5.86286e-19	36.7609
STK10	1.12679	6.46036	6.82333	1.89941e-09	1.10553e-08	10.9793
STK17A	1.05649	6.40304	5.42025	6.7896e-07	2.677e-06	5.2066
STK17B	1.17455	5.46223	4.86315	6.10766e-06	2.07457e-05	3.06823
STK33	-1.00567	5.65681	-9.39114	2.4261e-14	3.30412e-13	22.1375
STON2	-1.2595	5.52676	-11.3214	5.75065e-18	1.62639e-16	30.4306
STOX2	-1.45142	6.52098	-11.7142	1.0959e-18	3.71468e-17	32.0781
STRBP	-1.13739	6.95137	-11.314	5.93544e-18	1.66834e-16	30.3992
STRIP2	1.65849	3.81961	10.5417	1.6164e-16	3.45638e-15	27.1153
STXBP5L	-1.65002	4.93949	-12.7273	1.64883e-20	9.02515e-19	36.2481
STXBP6	-1.8252	6.52533	-9.71916	5.76392e-15	8.83904e-14	23.5647
SUCNR1	-1.34085	7.83041	-7.02735	7.85816e-10	4.88042e-09	11.85
SUGT1P3	-1.16602	4.1035	-11.2534	7.67684e-18	2.1239e-16	30.1435
SULT1A2	-1.02774	8.52124	-8.18269	4.97631e-12	4.46677e-11	16.8569
SULT1C2	-2.18547	6.70011	-11.6081	1.71202e-18	5.54044e-17	31.6348
SUSD1	1.08626	6.02944	8.3998	1.91044e-12	1.84201e-11	17.8056
SUV420H1	-1.14509	8.86742	-13.2839	1.73014e-21	1.28943e-19	38.4873
SVIP	-2.05502	8.36184	-13.1251	3.27889e-21	2.2065e-19	37.8524
SYBU	-1.97137	6.85532	-10.9551	2.73789e-17	6.77221e-16	28.8798
SYNDIG1	-1.70591	6.87142	-11.3601	4.88088e-18	1.41003e-16	30.5936
SYNE4	-1.41526	6.82281	-9.13746	7.39769e-14	9.16897e-13	21.0307
SYNM	-1.21695	8.4328	-10.4481	2.42172e-16	4.92963e-15	26.7136
SYT11	1.04638	4.83769	8.05547	8.7174e-12	7.48983e-11	16.3015
SYT13	-1.06057	5.99253	-6.91163	1.29718e-09	7.78378e-09	11.3554
SYT17	-1.58909	7.02337	-8.7077	4.91286e-13	5.22576e-12	19.1522
SYTL2	1.32195	5.78623	8.46719	1.41917e-12	1.40201e-11	18.1003
TACC3	1.33322	6.5664	7.63118	5.6319e-11	4.21242e-10	14.4546
TAF1A-AS1	-1.0901	5.90235	-8.69738	5.14166e-13	5.44132e-12	19.1071
TAF1D	1.37628	6.83442	7.90127	1.71882e-11	1.40002e-10	15.6292
TAGLN2	1.1011	9.11406	8.37168	2.16269e-12	2.0652e-11	17.6827
TAP1	1.28557	8.11313	4.85854	6.21696e-06	2.10763e-05	3.05102
TAPBPL	-1.26702	8.12956	-9.71285	5.9253e-15	9.06223e-14	23.5372
TBC1D4	-1.44834	8.85557	-12.8449	1.02062e-20	6.04971e-19	36.7246
TBX22	-2.05147	4.42139	-9.21953	5.15622e-14	6.57605e-13	21.389
TBXAS1	1.14567	4.8984	9.35016	2.90434e-14	3.88831e-13	21.9588
TC2N	-1.35683	5.46622	-12.026	2.97432e-19	1.18558e-17	33.3741
TCEA3	-1.22142	7.31415	-9.08396	9.36152e-14	1.13932e-12	20.7971
TCEAL1	-1.13503	8.98421	-8.03253	9.64429e-12	8.21524e-11	16.2014
TCEAL2	-4.77659	9.06358	-17.8021	8.28131e-29	7.89484e-26	55.1855
TCEAL3	-1.10264	9.99174	-8.85764	2.53666e-13	2.83353e-12	19.8079
TCEAL7	-1.76085	5.88592	-7.36075	1.8403e-10	1.26179e-09	13.2838
TCERG1L	-3.59253	7.63987	-9.9426	2.173e-15	3.62643e-14	24.5336
TCF19	1.54455	5.7988	9.63024	8.50532e-15	1.25631e-13	23.1783
TCF7L1	-1.24517	7.72937	-7.85247	2.13044e-11	1.70794e-10	15.4166
TCIRG1	1.55181	7.49261	8.29498	3.03313e-12	2.83142e-11	17.3474
TCTA	-1.16778	9.0893	-13.0456	4.52098e-21	2.95056e-19	37.5334
TDO2	1.67252	3.97799	9.3223	3.28238e-14	4.35194e-13	21.8374
TDRD9	-2.69286	7.5276	-8.44716	1.55023e-12	1.52098e-11	18.0127
TDRP	-1.50665	7.19428	-10.4087	2.87062e-16	5.74626e-15	26.5446
TEX2	-1.33371	8.93959	-11.0587	1.75827e-17	4.49991e-16	29.3199
TFCP2L1	-2.53752	7.47846	-14.4213	1.94876e-23	2.73544e-21	42.9403
TFEC	1.16295	4.02928	5.13597	2.10918e-06	7.71019e-06	4.10148
TFF3	-5.39598	10.7417	-22.8025	1.08961e-35	1.85631e-31	70.7574
TFPI2	3.98573	4.84564	10.9212	3.16472e-17	7.76918e-16	28.7358
TG	-5.69919	12.8972	-12.7624	1.42849e-20	8.01072e-19	36.3906
TGFB1	1.12393	5.57889	9.41019	2.23146e-14	3.0554e-13	22.2205
TGFB1I1	1.3969	8.53327	7.91866	1.59217e-11	1.30447e-10	15.705
TGFBI	3.19367	9.34506	13.4975	7.35938e-22	6.123e-20	39.3361
TGFBR1	1.07742	6.79607	10.8157	4.97249e-17	1.15386e-15	28.2868
TGFBR3	-1.3874	8.39488	-8.51334	1.15777e-12	1.15464e-11	18.3021
TGM2	1.44615	5.81207	10.0572	1.319e-15	2.29495e-14	25.0296
THAP9	-1.37504	5.55445	-12.5966	2.81439e-20	1.45357e-18	35.7169
THBS1	1.77133	5.03703	12.4768	4.60306e-20	2.24081e-18	35.2281
THBS2	2.5274	7.99067	12.9307	7.20075e-21	4.42885e-19	37.071
THNSL1	-1.63578	6.74498	-10.8503	4.28756e-17	1.01763e-15	28.4341
TIFA	-1.12496	7.02637	-12.2508	1.16955e-19	5.20608e-18	34.3016
TIGD7	-1.14179	6.93496	-8.14489	5.87843e-12	5.18499e-11	16.6918
TIMP1	2.50355	10.7254	12.5257	3.76369e-20	1.89658e-18	35.4281
TIMP2	1.12352	9.38366	9.16587	6.52877e-14	8.15829e-13	21.1548
TK1	2.20808	6.2213	11.1874	1.01642e-17	2.75868e-16	29.8646
TLE2	-1.52948	7.91913	-9.98168	1.8327e-15	3.10839e-14	24.7028
TLR1	1.92487	4.89907	7.19537	3.78604e-10	2.47924e-09	12.571
TLR2	2.36221	7.16101	12.2729	1.06726e-19	4.80687e-18	34.3925
TLR8	1.33265	4.7623	5.82825	1.28275e-07	5.63651e-07	6.8368
TM7SF2	-2.06877	7.95459	-13.3945	1.11072e-21	8.82403e-20	38.9274
TMC4	-2.70737	8.71441	-11.5453	2.23118e-18	7.06078e-17	31.3716
TMED4	-1.09118	7.64157	-13.468	8.27793e-22	6.81292e-20	39.2193
TMEM125	-2.56999	8.4816	-12.6166	2.59224e-20	1.35412e-18	35.7986
TMEM132B	-1.02519	4.75528	-11.5746	1.97182e-18	6.30982e-17	31.4944
TMEM139	-2.7709	6.59633	-17.6702	1.30684e-28	1.19602e-25	54.735
TMEM150C	-1.18523	6.8801	-8.59715	7.9997e-13	8.20409e-12	18.6687
TMEM154	1.19138	4.83221	5.61699	3.05653e-07	1.27198e-06	5.98663
TMEM158	4.59605	6.7246	14.0501	8.27591e-23	9.23672e-21	41.5054
TMEM170B	-1.72297	6.1207	-10.4503	2.39877e-16	4.89161e-15	26.7231
TMEM171	-1.61271	6.83882	-9.9288	2.30775e-15	3.83173e-14	24.4738
TMEM176A	1.46195	7.31957	6.72271	2.92983e-09	1.65461e-08	10.552
TMEM178A	-2.72027	7.24714	-12.5011	4.1648e-20	2.04926e-18	35.3275
TMEM178B	-1.14251	6.30044	-10.2416	5.92117e-16	1.11137e-14	25.8253
TMEM192	-1.46971	8.53236	-11.8388	6.49942e-19	2.33816e-17	32.5973
TMEM2	1.31679	6.99497	9.96302	1.98798e-15	3.35188e-14	24.622
TMEM200A	2.51673	6.42479	8.54019	1.02846e-12	1.03343e-11	18.4196
TMEM220	-1.3949	7.26763	-10.2124	6.72191e-16	1.2403e-14	25.6992
TMEM243	-1.57214	10.2017	-12.8283	1.09225e-20	6.39149e-19	36.6572
TMEM245	-1.32585	9.01484	-12.7555	1.46957e-20	8.22095e-19	36.3624
TMEM246	-1.03858	6.2715	-5.88048	1.03325e-07	4.60474e-07	7.04881
TMEM27	-2.13257	5.4236	-11.8803	5.46395e-19	2.03608e-17	32.7698
TMEM30B	-2.17531	7.31647	-13.3256	1.46377e-21	1.11266e-19	38.6533
TMEM37	-1.17168	7.60502	-11.3729	4.62287e-18	1.35257e-16	30.6476
TMEM45A	1.72677	8.0111	8.91838	1.94099e-13	2.20725e-12	20.0735
TMEM47	-1.68664	8.79875	-9.55694	1.17251e-14	1.68405e-13	22.8595
TMEM50B	-1.24623	8.54515	-13.0329	4.75895e-21	3.08456e-19	37.4824
TMEM51	1.29878	6.91612	10.6875	8.62799e-17	1.93348e-15	27.7391
TMEM56	-1.60233	6.27805	-6.89348	1.40306e-09	8.35988e-09	11.278
TMEM64	-1.11857	7.97799	-10.0522	1.3481e-15	2.33848e-14	25.0079
TMOD1	-1.36011	7.91487	-13.5149	6.86562e-22	5.7752e-20	39.4051
TMSB10	1.1161	12.8369	10.2006	7.07498e-16	1.29916e-14	25.6484
TNC	1.85327	4.85915	8.83576	2.79351e-13	3.09219e-12	19.7122
[truncated: 196 more rows]
