# Supplementary material for: DEPDC1 Promotes Thyroid Cancer Migration, Invasion, and Proliferation, and Correlates with Poor Prognosis
Source: Preprints.org preprint supplement (doi:10.20944/preprints202311.1621.v1), 2023-11-28
Supplement: Supplementary file 2 [file Supplementary Material 2.xlsx]

## Sheet: Sheet1
Query	Gene	cor	pvalue
DEPDC1	EFCAB13	-0.832156	5.36626e-06
DEPDC1	GPLD1	-0.824418	7.81299e-06
DEPDC1	CACFD1	-0.824036	7.95564e-06
DEPDC1	ZNF483	-0.823699	8.08321e-06
DEPDC1	CRY2	-0.817582	1.07291e-05
DEPDC1	ZMIZ1-AS1	-0.814059	1.25709e-05
DEPDC1	LINC00086	-0.810609	1.46346e-05
DEPDC1	FMOD	-0.808405	1.61015e-05
DEPDC1	LMO3	-0.807008	1.70961e-05
DEPDC1	CELF4	-0.801741	2.13392e-05
DEPDC1	ZNF540	-0.801202	2.18205e-05
DEPDC1	AFF1	-0.79945	2.34524e-05
DEPDC1	TPTE2P5	-0.798224	2.46555e-05
DEPDC1	STK32A	-0.796495	2.64429e-05
DEPDC1	PEBP4	-0.792184	3.13967e-05
DEPDC1	VSTM4	-0.792019	3.16014e-05
DEPDC1	ATP13A4	-0.79118	3.2659e-05
DEPDC1	DAPK2	-0.789138	3.53626e-05
DEPDC1	COLCA1	-0.785723	4.03169e-05
DEPDC1	SNX22	-0.783737	4.34646e-05
DEPDC1	RAI2	-0.783694	4.35352e-05
DEPDC1	SPATA6L	-0.780797	4.85132e-05
DEPDC1	SYNDIG1	-0.777572	5.46272e-05
DEPDC1	CTC-523E23.1	-0.773136	6.4113e-05
DEPDC1	CACNA1D	-0.771084	6.89589e-05
DEPDC1	LOC101926996	-0.768896	7.4472e-05
DEPDC1	WBSCR17	-0.766048	8.22153e-05
DEPDC1	LECT1	-0.765694	8.32244e-05
DEPDC1	PLCD1	-0.76307	9.10386e-05
DEPDC1	CMYA5	-0.760738	9.85072e-05
DEPDC1	KCNJ15	-0.758054	0.00010775
DEPDC1	MGAT4C	-0.757807	0.000108636
DEPDC1	LRIG3	-0.755105	0.000118755
DEPDC1	SOX6	-0.754645	0.000120552
DEPDC1	SCUBE3	-0.754278	0.000122006
DEPDC1	ZNF626	-0.754258	0.000122088
DEPDC1	ST5	-0.75206	0.000131112
DEPDC1	DUOX1	-0.751161	0.000134966
DEPDC1	PACRG	-0.750244	0.000139
DEPDC1	CHDH	-0.749698	0.000141447
DEPDC1	ST3GAL5	-0.749092	0.000144207
DEPDC1	ACOT11	-0.747297	0.00015266
DEPDC1	XKRX	-0.747281	0.000152735
DEPDC1	C1orf116	-0.747078	0.000153716
DEPDC1	DUOXA1	-0.746485	0.000156618
DEPDC1	CCDC158	-0.744286	0.000167785
DEPDC1	AMIGO1	-0.743152	0.00017381
DEPDC1	FAM63A	-0.743147	0.000173836
DEPDC1	MYO15B	-0.74246	0.000177572
DEPDC1	MLLT4-AS1	-0.739626	0.000193727
DEPDC1	MMP28	-0.735854	0.000217172
DEPDC1	LCN10	-0.735302	0.000220798
DEPDC1	ZNF563	-0.733631	0.000232088
DEPDC1	EPHA4	-0.732306	0.000241397
DEPDC1	AF086288	-0.732054	0.000243198
DEPDC1	KIAA1456	-0.731236	0.000249134
DEPDC1	SLC22A31	-0.730521	0.000254428
DEPDC1	CYP1A2	-0.730495	0.000254619
DEPDC1	DNAJB2	-0.729572	0.000261597
DEPDC1	DCAF8	-0.729211	0.000264372
DEPDC1	KANK1	-0.728401	0.000270684
DEPDC1	CLUL1	-0.72805	0.000273463
DEPDC1	COL4A3	-0.727709	0.000276181
DEPDC1	ADORA1	-0.727213	0.000280174
DEPDC1	FAXDC2	-0.727212	0.000280189
DEPDC1	RNF180	-0.726381	0.000286989
DEPDC1	NDRG2	-0.726182	0.000288642
DEPDC1	CBX7	-0.725943	0.000290639
DEPDC1	SFTPD	-0.725231	0.000296648
DEPDC1	CITED1	-0.724812	0.000300231
DEPDC1	GPRIN2	-0.724156	0.000305916
DEPDC1	WDR86	-0.723772	0.000309291
DEPDC1	EFCAB6	-0.722709	0.000318788
DEPDC1	LOC101928424	-0.72032	0.000341049
DEPDC1	SH2B1	-0.719252	0.000351421
DEPDC1	ADCY9	-0.718767	0.000356222
DEPDC1	DTX4	-0.717358	0.000370478
DEPDC1	TBC1D22B	-0.715525	0.000389749
DEPDC1	NEK8	-0.715084	0.000394503
DEPDC1	CYP27B1	-0.715015	0.000395261
DEPDC1	RASEF	-0.714892	0.000396594
DEPDC1	WSCD2	-0.714187	0.000404345
DEPDC1	RORC	-0.713157	0.000415898
DEPDC1	LYRM9	-0.712318	0.000425512
DEPDC1	ATP1A1-AS1	-0.712219	0.000426661
DEPDC1	CD83	-0.712092	0.000428143
DEPDC1	ABLIM1	-0.711149	0.000439233
DEPDC1	ABCC6P1	-0.710823	0.000443124
DEPDC1	SLC26A4-AS1	-0.708871	0.000467041
DEPDC1	PGAP3	-0.708493	0.0004718
DEPDC1	GRHL3	-0.707932	0.000478935
DEPDC1	SYT13	-0.707799	0.000480634
DEPDC1	SBSPON	-0.707467	0.000484916
DEPDC1	RP11-774O3.3	-0.70739	0.000485917
DEPDC1	MZF1	-0.707017	0.000490762
DEPDC1	LOC91548	-0.706858	0.000492851
DEPDC1	CNTN4	-0.705084	0.000516591
DEPDC1	AOC1	-0.704479	0.000524895
DEPDC1	DQ597730	-0.704249	0.000528083
DEPDC1	HYDIN	-0.704107	0.000530061
DEPDC1	RP11-506O24.2	-0.702818	0.000548315
DEPDC1	PPP1R14C	-0.702602	0.000551425
DEPDC1	FHDC1	-0.701411	0.000568823
DEPDC1	FARP1	-0.701272	0.000570894
DEPDC1	SULT1C2	-0.700287	0.000585692
DEPDC1	INPP5J	-0.699238	0.000601795
DEPDC1	HLF	-0.6991	0.000603951
DEPDC1	RALGPS1	-0.698682	0.000610496
DEPDC1	FBF1	-0.698407	0.000614826
DEPDC1	PHF21B	-0.697711	0.000625918
DEPDC1	UBE2QL1	-0.697363	0.000631541
DEPDC1	ZNF641	-0.696815	0.000640461
DEPDC1	ZC2HC1C	-0.696692	0.00064247
DEPDC1	ERBB4	-0.696522	0.000645267
DEPDC1	TCERG1L	-0.696106	0.000652162
DEPDC1	GALNT18	-0.695245	0.000666614
DEPDC1	PPAP2B	-0.69467	0.00067641
DEPDC1	MYO3B	-0.694634	0.000677039
DEPDC1	MPV17L	-0.69279	0.000709334
DEPDC1	VSIG2	-0.692681	0.000711272
DEPDC1	LDLRAD4	-0.691574	0.000731323
DEPDC1	ZNF44	-0.690584	0.000749666
DEPDC1	C2orf40	-0.690432	0.000752507
DEPDC1	C11orf52	-0.689917	0.000762237
DEPDC1	LRRC48	-0.689821	0.000764058
DEPDC1	MPZL3	-0.689771	0.000765004
DEPDC1	ZNF135	-0.689357	0.000772924
DEPDC1	D2HGDH	-0.688091	0.000797558
DEPDC1	C21orf88	-0.687998	0.000799389
DEPDC1	PLEKHB1	-0.686355	0.000832434
DEPDC1	PNMAL2	-0.685984	0.000840045
DEPDC1	LRRC56	-0.685713	0.000845648
DEPDC1	SLC26A3	-0.685072	0.000859012
DEPDC1	DIO2	-0.684894	0.000862749
DEPDC1	RGL3	-0.684678	0.000867312
DEPDC1	ITGB6	-0.684528	0.000870495
DEPDC1	PPIEL	-0.684465	0.00087184
DEPDC1	DOCK9-AS2	-0.684155	0.000878463
DEPDC1	ALOX15B	-0.683249	0.000898022
DEPDC1	INADL	-0.683187	0.000899379
DEPDC1	POU2F3	-0.682472	0.000915101
DEPDC1	AX746755	-0.681479	0.000937324
DEPDC1	LONRF2	-0.681343	0.000940404
DEPDC1	VANGL2	-0.680151	0.000967744
DEPDC1	CD9	-0.679876	0.000974141
DEPDC1	IQCA1	-0.679813	0.000975616
DEPDC1	SFTPB	-0.679024	0.000994211
DEPDC1	XKR4	-0.678941	0.000996196
DEPDC1	RRP1B	0.679103	0.000992337
DEPDC1	C2orf44	0.679311	0.000987417
DEPDC1	FABP5	0.679979	0.000971749
DEPDC1	TUBA3C	0.679996	0.000971341
DEPDC1	VTA1	0.680404	0.000961878
DEPDC1	EIF2B3	0.680808	0.000952596
DEPDC1	KDELC1	0.681017	0.000947798
DEPDC1	NUDT1	0.681484	0.000937202
DEPDC1	OXSR1	0.681692	0.000932509
DEPDC1	HMGB3	0.682072	0.000924
DEPDC1	PPP5C	0.682137	0.000922551
DEPDC1	HSPA14	0.682422	0.000916205
DEPDC1	SAC3D1	0.682494	0.000914599
DEPDC1	ARPC5L	0.683051	0.000902344
DEPDC1	IKBIP	0.683253	0.000897924
DEPDC1	C12orf75	0.683715	0.000887919
DEPDC1	COPS3	0.684014	0.000881475
DEPDC1	AP1AR	0.684019	0.000881359
DEPDC1	HIST1H3C	0.684251	0.000876391
DEPDC1	MSH2	0.68438	0.000873646
DEPDC1	FOXJ3	0.684537	0.000870317
DEPDC1	CCDC86	0.684854	0.000863591
DEPDC1	PSMB7	0.684896	0.00086271
DEPDC1	EXOSC2	0.685467	0.000850762
DEPDC1	PWP1	0.685514	0.000849782
DEPDC1	SPTLC2	0.685686	0.000846197
DEPDC1	SMIM13	0.685817	0.000843494
DEPDC1	UBE2G1	0.686433	0.000830837
DEPDC1	RBM34	0.686724	0.000824901
DEPDC1	SLC25A14	0.686866	0.000822036
DEPDC1	KPNA4	0.687062	0.00081808
DEPDC1	RP3-406P24.1	0.687154	0.000816219
DEPDC1	MAPKAPK5	0.68738	0.000811686
DEPDC1	PRKCA	0.687922	0.000800904
DEPDC1	QSER1	0.688024	0.00079888
DEPDC1	TROAP	0.688318	0.000793091
DEPDC1	SLC2A4RG	0.688432	0.000790867
DEPDC1	METAP1	0.688596	0.000787664
DEPDC1	ROR1	0.689407	0.000771955
DEPDC1	PSMB2	0.690371	0.000753664
DEPDC1	MCM8	0.69044	0.000752355
DEPDC1	CDCA7	0.691387	0.000734766
DEPDC1	REXO2	0.69156	0.000731587
DEPDC1	SPAG5	0.691751	0.000728097
DEPDC1	TUBB4B	0.693039	0.000704884
DEPDC1	BZW1	0.693175	0.000702487
DEPDC1	UMPS	0.693409	0.000698345
DEPDC1	TPM4	0.693639	0.000694297
DEPDC1	WWP1	0.693876	0.000690162
DEPDC1	ARHGAP11B	0.693978	0.000688378
DEPDC1	NIN	0.694087	0.000686475
DEPDC1	DAPK3	0.695109	0.000668915
DEPDC1	HSPA13	0.695146	0.000668293
DEPDC1	DKC1	0.695261	0.000666341
DEPDC1	RANGAP1	0.695918	0.000655289
DEPDC1	MSH6	0.696313	0.000648721
DEPDC1	C10orf88	0.696408	0.00064715
DEPDC1	HPRT1	0.696617	0.000643707
DEPDC1	BRIX1	0.696656	0.000643071
DEPDC1	CACYBP	0.696656	0.000643063
DEPDC1	MCM7	0.697189	0.00063435
DEPDC1	NKAP	0.697732	0.000625579
DEPDC1	TAF5	0.697939	0.000622263
DEPDC1	RSRC1	0.698131	0.000619205
DEPDC1	RAN	0.698285	0.000616757
DEPDC1	TTF2	0.698547	0.000612616
DEPDC1	ARF4	0.698791	0.000608772
DEPDC1	AUNIP	0.699489	0.000597911
DEPDC1	DOCK7	0.699769	0.000593591
DEPDC1	WDR36	0.70007	0.000588989
DEPDC1	SLC7A1	0.700111	0.000588367
DEPDC1	PFN2	0.70028	0.000585799
DEPDC1	WRAP73	0.700385	0.000584205
DEPDC1	TTC39C	0.700838	0.000577368
DEPDC1	SEC61A1	0.7013	0.000570481
DEPDC1	MSANTD3	0.70163	0.000565592
DEPDC1	ELF4	0.701873	0.00056202
DEPDC1	DDX10	0.702069	0.000559148
DEPDC1	ARL4A	0.702337	0.000555254
DEPDC1	NME1	0.702549	0.000552181
DEPDC1	PSAT1	0.702853	0.000547808
DEPDC1	CALML4	0.702945	0.000546492
DEPDC1	DSN1	0.703214	0.000542651
DEPDC1	C1orf112	0.703497	0.000538632
DEPDC1	SIAH2	0.7035	0.000538597
DEPDC1	SMNDC1	0.703722	0.000535465
DEPDC1	LINC01116	0.703722	0.000535458
DEPDC1	PRPF4	0.703746	0.000535125
DEPDC1	CMSS1	0.703763	0.00053489
DEPDC1	CHAF1B	0.704291	0.000527504
DEPDC1	WDR4	0.704746	0.00052122
DEPDC1	MRE11A	0.704876	0.000519435
DEPDC1	CDK17	0.705699	0.00050825
DEPDC1	PTPN11	0.705737	0.000507737
DEPDC1	RANBP1	0.70598	0.000504476
DEPDC1	DOLPP1	0.706052	0.000503511
DEPDC1	HCCS	0.706333	0.000499771
DEPDC1	MIR6824	0.706501	0.000497547
DEPDC1	HYLS1	0.706898	0.000492321
DEPDC1	PRKDC	0.70694	0.000491774
DEPDC1	ORC1	0.707493	0.000484584
DEPDC1	LYPLA1	0.707869	0.000479745
DEPDC1	DNMT1	0.708216	0.000475315
DEPDC1	SGOL1	0.708387	0.000473145
DEPDC1	MRPL37	0.709402	0.000460424
DEPDC1	ADORA2B	0.709635	0.000457551
DEPDC1	DNM1L	0.709688	0.000456902
DEPDC1	TTC4	0.70972	0.000456504
DEPDC1	SHQ1	0.709836	0.000455088
DEPDC1	ZBED4	0.710017	0.000452874
DEPDC1	CREM	0.710024	0.000452787
DEPDC1	UGCG	0.710325	0.000449121
DEPDC1	PSMA7	0.710531	0.000446631
DEPDC1	IMPAD1	0.710689	0.00044473
DEPDC1	IARS	0.71072	0.000444365
DEPDC1	NUDT2	0.710797	0.000443441
DEPDC1	DNA2	0.71096	0.000441487
DEPDC1	TPD52L2	0.71109	0.000439939
DEPDC1	MYBL2	0.711798	0.000431576
DEPDC1	PGBD1	0.711995	0.000429267
DEPDC1	MTERF3	0.712019	0.000428993
DEPDC1	SRPK1	0.712218	0.000426677
DEPDC1	EBNA1BP2	0.7125	0.000423414
DEPDC1	SNRPB	0.71255	0.000422835
DEPDC1	MCTS1	0.713025	0.000417395
DEPDC1	MROH7-TTC4	0.713282	0.000414485
DEPDC1	ASF1B	0.713316	0.000414102
DEPDC1	C1orf159	0.713465	0.000412419
DEPDC1	SENP5	0.714237	0.000403796
DEPDC1	PRIM2	0.714572	0.000400097
DEPDC1	RASSF1	0.71475	0.000398149
DEPDC1	SMCHD1	0.715164	0.000393638
DEPDC1	TCEB1	0.715566	0.000389302
DEPDC1	RBL1	0.715572	0.000389245
DEPDC1	RABEPK	0.716006	0.000384612
DEPDC1	ZNHIT6	0.716463	0.000379784
DEPDC1	ERCC6L	0.716577	0.000378582
DEPDC1	MCM3	0.717407	0.00036997
DEPDC1	CDT1	0.717473	0.000369296
DEPDC1	UBE2C	0.717625	0.000367741
DEPDC1	CNEP1R1	0.717738	0.000366584
DEPDC1	ARNTL2	0.718488	0.000359
DEPDC1	UTP11L	0.719416	0.000349813
DEPDC1	EXOSC8	0.719468	0.000349297
DEPDC1	SRM	0.719505	0.000348935
DEPDC1	MPHOSPH9	0.719983	0.00034429
DEPDC1	RCOR1	0.720926	0.000335281
DEPDC1	CCNF	0.720971	0.00033486
DEPDC1	CASP7	0.721194	0.000332756
DEPDC1	LOC100289092	0.721569	0.000329247
DEPDC1	HMGB2	0.721615	0.000328822
DEPDC1	NEIL3	0.721723	0.000327818
DEPDC1	TMEM194A	0.72193	0.000325906
DEPDC1	FAM24B	0.723346	0.000313069
DEPDC1	MAD2L2	0.723421	0.000312395
DEPDC1	SNRPF	0.723546	0.000311285
DEPDC1	GEMIN2	0.723789	0.000309142
DEPDC1	KIF18B	0.72425	0.000305099
DEPDC1	PPIH	0.724553	0.000302466
DEPDC1	PTX3	0.724761	0.000300669
DEPDC1	TMX1	0.725004	0.000298584
DEPDC1	UAP1	0.725062	0.000298084
DEPDC1	CEP76	0.725489	0.000294458
DEPDC1	NUDT21	0.727014	0.000281791
DEPDC1	ACOT7	0.727086	0.000281205
DEPDC1	SMC3	0.72716	0.000280604
DEPDC1	GNPNAT1	0.727587	0.000277156
DEPDC1	TDP1	0.728291	0.000271552
DEPDC1	ZFP69B	0.728541	0.000269582
DEPDC1	SRGAP2	0.729696	0.000260656
DEPDC1	GOLT1B	0.731046	0.000250537
DEPDC1	LOC285812	0.731252	0.000249019
DEPDC1	PHF19	0.731555	0.000246809
DEPDC1	RAD18	0.731658	0.000246058
DEPDC1	THOC5	0.73243	0.000240511
DEPDC1	SACS	0.732776	0.00023806
DEPDC1	CSE1L	0.734042	0.000229269
DEPDC1	MTHFD2	0.73471	0.000224742
DEPDC1	YBX1	0.735562	0.00021908
DEPDC1	TTL	0.735601	0.00021883
DEPDC1	EXOSC3	0.735903	0.00021685
DEPDC1	GAS2L1	0.736078	0.000215716
DEPDC1	TMSB10	0.736414	0.000213548
DEPDC1	RSU1	0.736578	0.00021249
DEPDC1	TAF1A	0.736752	0.000211383
DEPDC1	L3HYPDH	0.736951	0.000210115
DEPDC1	RCN1	0.737162	0.000208783
DEPDC1	KIAA1432	0.737247	0.000208249
DEPDC1	ARMC1	0.738088	0.000203011
DEPDC1	MIS18A	0.738377	0.000201241
DEPDC1	BVES	0.738406	0.000201059
DEPDC1	TMPO-AS1	0.738454	0.000200767
DEPDC1	CDK2	0.738541	0.000200238
DEPDC1	NMD3	0.73864	0.000199636
DEPDC1	CALU	0.738916	0.000197971
DEPDC1	CKAP5	0.739168	0.000196457
DEPDC1	SLC25A43	0.739364	0.000195286
DEPDC1	KCTD5	0.740064	0.000191153
DEPDC1	NRAS	0.740176	0.000190502
DEPDC1	NUP85	0.740446	0.000188932
DEPDC1	TUBB6	0.740826	0.00018674
DEPDC1	SNX6	0.741053	0.000185445
DEPDC1	PSMD2	0.74202	0.000180004
DEPDC1	ATP2C1	0.742339	0.000178237
DEPDC1	DDX55	0.743344	0.000172774
DEPDC1	BUB1	0.743681	0.000170975
DEPDC1	CORO1C	0.743718	0.000170779
DEPDC1	FOXD1	0.743932	0.000169647
DEPDC1	PPP1R14B	0.744239	0.000168034
DEPDC1	EIF2S1	0.744658	0.000165849
DEPDC1	KNTC1	0.744667	0.000165803
DEPDC1	ANKRD32	0.745347	0.000162317
DEPDC1	ARL6IP6	0.746455	0.000156765
DEPDC1	TUBB2A	0.747233	0.000152968
DEPDC1	BCAR3	0.74747	0.000151826
DEPDC1	BUB3	0.747874	0.000149897
DEPDC1	MRPL3	0.747992	0.000149339
DEPDC1	UBASH3B	0.748533	0.000146793
DEPDC1	NAA50	0.748742	0.000145825
DEPDC1	MRPL13	0.749567	0.000142041
DEPDC1	C4orf46	0.749816	0.000140916
DEPDC1	CMC2	0.74986	0.000140716
DEPDC1	MAGOHB	0.749992	0.000140122
DEPDC1	GABPB1	0.750035	0.000139932
DEPDC1	RNF168	0.750503	0.000137847
DEPDC1	ATP11C	0.750817	0.000136468
DEPDC1	PSRC1	0.751951	0.000131576
DEPDC1	MCM5	0.752922	0.000127509
DEPDC1	CDCA4	0.753259	0.000126121
DEPDC1	RAD21	0.75353	0.000125017
DEPDC1	SRD5A1	0.753864	0.000123666
DEPDC1	CCT2	0.754125	0.000122618
DEPDC1	TIPIN	0.754911	0.000119509
DEPDC1	TK1	0.754973	0.000119267
DEPDC1	EXO1	0.755229	0.000118273
DEPDC1	PCNA	0.755409	0.000117577
DEPDC1	DR1	0.756327	0.00011408
DEPDC1	ABCE1	0.756938	0.000111806
DEPDC1	NUP50	0.757015	0.000111522
DEPDC1	BRIP1	0.757428	0.00011001
DEPDC1	FAM64A	0.75887	0.000104866
DEPDC1	HN1	0.75923	0.000103612
DEPDC1	CPOX	0.759504	0.000102668
DEPDC1	ERI1	0.760033	0.000100867
DEPDC1	TOPBP1	0.761224	9.69096e-05
DEPDC1	NUP37	0.761956	9.45458e-05
DEPDC1	RECQL	0.762191	9.37968e-05
DEPDC1	CENPM	0.762501	9.28158e-05
DEPDC1	ASPM	0.762519	9.27584e-05
DEPDC1	UBE3C	0.76401	8.8171e-05
DEPDC1	MRTO4	0.764113	8.78619e-05
DEPDC1	NUP107	0.764178	8.76645e-05
DEPDC1	DCLRE1B	0.766681	8.04366e-05
DEPDC1	FAM216A	0.766866	7.99236e-05
DEPDC1	LRR1	0.767767	7.74627e-05
DEPDC1	AURKB	0.768065	7.66652e-05
DEPDC1	CENPI	0.768158	7.64173e-05
DEPDC1	MTFR1	0.768387	7.58094e-05
DEPDC1	ATP2B1	0.768812	7.46915e-05
DEPDC1	NCBP1	0.769323	7.33696e-05
DEPDC1	POLQ	0.770169	7.12224e-05
DEPDC1	SPC24	0.770241	7.10407e-05
DEPDC1	DONSON	0.770606	7.01323e-05
DEPDC1	TFDP1	0.770991	6.91859e-05
DEPDC1	LOC101927137	0.771091	6.89428e-05
DEPDC1	LBR	0.771335	6.8351e-05
DEPDC1	TIMELESS	0.77168	6.75195e-05
DEPDC1	KATNAL1	0.77187	6.70662e-05
DEPDC1	TUBB3	0.772169	6.6358e-05
DEPDC1	ORC6	0.772643	6.52502e-05
DEPDC1	CENPU	0.773971	6.22255e-05
DEPDC1	E2F7	0.774206	6.17037e-05
DEPDC1	TUBA1B	0.774586	6.08666e-05
DEPDC1	CENPQ	0.774833	6.03278e-05
DEPDC1	KIF2A	0.775545	5.8799e-05
DEPDC1	RUVBL1	0.775728	5.84121e-05
DEPDC1	G2E3	0.776813	5.61581e-05
DEPDC1	PPAT	0.776954	5.58714e-05
DEPDC1	TMCO3	0.777247	5.52772e-05
DEPDC1	SLC16A1	0.777264	5.52427e-05
DEPDC1	HAUS6	0.777567	5.46356e-05
DEPDC1	DTYMK	0.777915	5.39458e-05
DEPDC1	SEH1L	0.778311	5.31696e-05
DEPDC1	E2F8	0.778751	5.23188e-05
DEPDC1	DNAJC9	0.779525	5.08504e-05
DEPDC1	EZH2	0.779593	5.07224e-05
DEPDC1	SLC25A32	0.78153	4.72103e-05
DEPDC1	NOL11	0.782909	4.48384e-05
DEPDC1	XRCC4	0.783348	4.41053e-05
DEPDC1	CDC25A	0.784791	4.17686e-05
DEPDC1	MCM6	0.785152	4.12004e-05
DEPDC1	CENPW	0.785563	4.05633e-05
DEPDC1	NUDCD1	0.786926	3.85067e-05
DEPDC1	RNASEH2A	0.787009	3.83846e-05
DEPDC1	VRK1	0.787244	3.804e-05
DEPDC1	UCHL5	0.78757	3.75672e-05
DEPDC1	ITGB3BP	0.787682	3.74059e-05
DEPDC1	CDC45	0.787889	3.71089e-05
DEPDC1	DSCC1	0.78825	3.65964e-05
DEPDC1	RFC3	0.789646	3.46718e-05
DEPDC1	BLM	0.790355	3.3729e-05
DEPDC1	TBC1D31	0.790658	3.33317e-05
DEPDC1	ZMYND19	0.791022	3.28616e-05
DEPDC1	HAUS8	0.791353	3.24388e-05
DEPDC1	GLRX2	0.791455	3.23088e-05
DEPDC1	TUBA1C	0.794166	2.90275e-05
DEPDC1	EIF4EBP1	0.795235	2.78157e-05
DEPDC1	BUB1B	0.795416	2.7614e-05
DEPDC1	PAICS	0.795961	2.70174e-05
DEPDC1	MOSPD1	0.796209	2.67492e-05
DEPDC1	GPSM2	0.796575	2.63583e-05
DEPDC1	ARHGAP11A	0.797294	2.56037e-05
DEPDC1	POLE2	0.797339	2.55569e-05
DEPDC1	MASTL	0.797555	2.53339e-05
DEPDC1	TEX30	0.798436	2.44435e-05
DEPDC1	LYAR	0.798538	2.4342e-05
DEPDC1	TCF19	0.798567	2.4313e-05
DEPDC1	TYMS	0.799899	2.3024e-05
DEPDC1	SKA3	0.800326	2.26233e-05
DEPDC1	MIS18BP1	0.800552	2.24138e-05
DEPDC1	MRPL15	0.801535	2.15219e-05
DEPDC1	YRDC	0.802391	2.07703e-05
DEPDC1	GINS4	0.802792	2.0426e-05
DEPDC1	RAD54L	0.803061	2.01979e-05
DEPDC1	EXOSC9	0.804177	1.92751e-05
DEPDC1	SUV39H2	0.804258	1.92094e-05
DEPDC1	CKS1B	0.804807	1.87703e-05
DEPDC1	MTFR2	0.80513	1.85164e-05
DEPDC1	LMNB2	0.807459	1.6769e-05
DEPDC1	SNRPD1	0.807601	1.66677e-05
DEPDC1	RAD51	0.807665	1.66218e-05
DEPDC1	CCT5	0.808531	1.60145e-05
DEPDC1	SMC4	0.809385	1.54346e-05
DEPDC1	PRIM1	0.809428	1.54054e-05
DEPDC1	CHAF1A	0.809947	1.50623e-05
DEPDC1	CASC5	0.809961	1.50536e-05
DEPDC1	NUP155	0.811219	1.42495e-05
DEPDC1	IQCJ-SCHIP1	0.811521	1.40625e-05
DEPDC1	APOBEC3B	0.811919	1.3819e-05
DEPDC1	SGOL2	0.812242	1.36239e-05
DEPDC1	KIAA1524	0.812674	1.3367e-05
DEPDC1	CHAC2	0.812729	1.33347e-05
DEPDC1	SPDL1	0.81276	1.33162e-05
DEPDC1	BRCA2	0.812902	1.32333e-05
DEPDC1	RAD54B	0.813337	1.29805e-05
DEPDC1	POC1A	0.814918	1.20987e-05
DEPDC1	ACTL6A	0.815587	1.17414e-05
DEPDC1	CCNB2	0.81675	1.11418e-05
DEPDC1	LMNB1	0.816936	1.10481e-05
DEPDC1	GNL2	0.818966	1.00724e-05
DEPDC1	CDC25C	0.819317	9.91183e-06
DEPDC1	DHFR	0.819411	9.86893e-06
DEPDC1	BORA	0.821104	9.1269e-06
DEPDC1	HELLS	0.821382	9.00971e-06
DEPDC1	SKP2	0.823813	8.03973e-06
DEPDC1	FAM72A	0.824013	7.96425e-06
DEPDC1	DDIAS	0.825517	7.41531e-06
DEPDC1	TOP2A	0.826005	7.24457e-06
DEPDC1	MCM2	0.827536	6.73055e-06
DEPDC1	MCMBP	0.828255	6.50026e-06
DEPDC1	PLK4	0.829184	6.21287e-06
DEPDC1	C18orf54	0.82959	6.09081e-06
DEPDC1	KCTD9	0.829936	5.98842e-06
DEPDC1	CENPL	0.830537	5.81415e-06
DEPDC1	CENPO	0.831283	5.604e-06
DEPDC1	CKAP2L	0.83181	5.45954e-06
DEPDC1	GMNN	0.83346	5.02797e-06
DEPDC1	NDC1	0.833816	4.93865e-06
DEPDC1	DIAPH3	0.834056	4.87936e-06
DEPDC1	DBF4	0.835104	4.62779e-06
DEPDC1	ICMT	0.837074	4.18494e-06
DEPDC1	FANCI	0.837975	3.99519e-06
DEPDC1	NEDD1	0.838288	3.93096e-06
DEPDC1	USP1	0.838392	3.90977e-06
DEPDC1	SCML1	0.83859	3.86992e-06
DEPDC1	C9orf40	0.840491	3.5041e-06
DEPDC1	UBE2S	0.841234	3.36944e-06
DEPDC1	GNB4	0.841862	3.2593e-06
DEPDC1	CLIC4	0.844383	2.84798e-06
DEPDC1	MAGOH	0.845744	2.64522e-06
DEPDC1	CDC7	0.847459	2.40782e-06
DEPDC1	UBE2T	0.848323	2.2955e-06
DEPDC1	CDCA3	0.848967	2.21469e-06
DEPDC1	CENPH	0.850035	2.08618e-06
DEPDC1	GAS2L3	0.853378	1.72511e-06
DEPDC1	CENPF	0.856046	1.47732e-06
DEPDC1	CTPS1	0.856695	1.42193e-06
DEPDC1	MRPL16	0.856751	1.41725e-06
DEPDC1	GGH	0.857869	1.32647e-06
DEPDC1	FOXM1	0.85866	1.26527e-06
DEPDC1	SPC25	0.859068	1.23474e-06
DEPDC1	CDCA5	0.860368	1.14159e-06
DEPDC1	KIAA0101	0.863512	9.41255e-07
DEPDC1	TRIP13	0.863827	9.22971e-07
DEPDC1	NCAPG2	0.863846	9.21902e-07
DEPDC1	GINS3	0.865691	8.21146e-07
DEPDC1	DTL	0.866703	7.70076e-07
DEPDC1	CENPK	0.867711	7.21964e-07
DEPDC1	TMPO	0.867876	7.14374e-07
DEPDC1	KIF18A	0.868565	6.83309e-07
DEPDC1	SMC2	0.868743	6.75493e-07
DEPDC1	CDC6	0.868889	6.69132e-07
DEPDC1	ATAD2	0.869037	6.62751e-07
DEPDC1	ZWILCH	0.870162	6.15845e-07
DEPDC1	OIP5	0.872166	5.39478e-07
DEPDC1	KIF4A	0.872374	5.32069e-07
DEPDC1	MCM10	0.87261	5.23756e-07
DEPDC1	CDCA2	0.873512	4.92994e-07
DEPDC1	NCAPH	0.873937	4.79043e-07
DEPDC1	ZNF367	0.874156	4.72012e-07
DEPDC1	TACC3	0.875201	4.39617e-07
DEPDC1	RRM1	0.875615	4.27329e-07
DEPDC1	KIF15	0.875695	4.24998e-07
DEPDC1	SKA1	0.876489	4.02379e-07
DEPDC1	HJURP	0.877495	3.75265e-07
DEPDC1	MND1	0.878264	3.55619e-07
DEPDC1	KIF14	0.880354	3.0672e-07
DEPDC1	CENPE	0.882022	2.72026e-07
DEPDC1	HEATR3	0.882715	2.58669e-07
DEPDC1	RMI2	0.882902	2.55158e-07
DEPDC1	CCNE2	0.883237	2.48977e-07
DEPDC1	GINS1	0.884775	2.22249e-07
DEPDC1	NDC80	0.88564	2.08368e-07
DEPDC1	CDKN3	0.88667	1.92823e-07
DEPDC1	FBXO5	0.888472	1.6805e-07
DEPDC1	CKS2	0.8897	1.52827e-07
DEPDC1	KIF20A	0.890297	1.45869e-07
DEPDC1	ZWINT	0.890429	1.44365e-07
DEPDC1	RAD51AP1	0.890739	1.40899e-07
DEPDC1	H2AFZ	0.891848	1.29077e-07
DEPDC1	CHEK1	0.893509	1.12999e-07
DEPDC1	WDHD1	0.896312	8.98236e-08
DEPDC1	GTSE1	0.89634	8.96135e-08
DEPDC1	KIF23	0.896384	8.92902e-08
DEPDC1	STMN1	0.896937	8.52653e-08
DEPDC1	CDK1	0.89899	7.16952e-08
DEPDC1	BIRC5	0.899024	7.14858e-08
DEPDC1	NEK2	0.899985	6.58305e-08
DEPDC1	UHRF1	0.900155	6.48695e-08
DEPDC1	KPNA2	0.901987	5.52893e-08
DEPDC1	FEN1	0.903904	4.66178e-08
DEPDC1	TTK	0.904755	4.31714e-08
DEPDC1	NUF2	0.906839	3.56521e-08
DEPDC1	RFC4	0.907538	3.34051e-08
DEPDC1	CDCA8	0.912346	2.10318e-08
DEPDC1	MKI67	0.912583	2.05435e-08
DEPDC1	ECT2	0.91272	2.02653e-08
DEPDC1	MCM4	0.91393	1.79545e-08
DEPDC1	RRM2	0.915403	1.54553e-08
DEPDC1	C5orf34	0.915554	1.52182e-08
DEPDC1	MAD2L1	0.915752	1.49107e-08
DEPDC1	PRC1	0.91625	1.41624e-08
DEPDC1	HMMR	0.917249	1.27598e-08
DEPDC1	KIF11	0.918054	1.17202e-08
DEPDC1	CDC20	0.921529	8.03902e-09
DEPDC1	NUSAP1	0.922183	7.4739e-09
DEPDC1	TPX2	0.926031	4.80327e-09
DEPDC1	ANLN	0.931709	2.39039e-09
DEPDC1	MELK	0.932574	2.13819e-09
DEPDC1	FAM83D	0.933608	1.86767e-09
DEPDC1	PARPBP	0.933659	1.85519e-09
DEPDC1	PBK	0.937997	1.02571e-09
DEPDC1	AURKA	0.943333	4.65463e-10
DEPDC1	SHCBP1	0.944267	4.02141e-10
DEPDC1	CEP55	0.944981	3.59029e-10
DEPDC1	RACGAP1	0.945446	3.33226e-10
DEPDC1	CCNB1	0.946378	2.86317e-10
DEPDC1	CENPA	0.946961	2.60063e-10
DEPDC1	DLGAP5	0.94717	2.51146e-10
DEPDC1	CENPN	0.94935	1.73273e-10
DEPDC1	CCNA2	0.951032	1.28638e-10
DEPDC1	STIL	0.955079	6.00723e-11
DEPDC1	KIF2C	0.956095	4.90795e-11
DEPDC1	NCAPG	0.957468	3.70609e-11
